# Supplementary material for: Viromes of one year old infants reveal the impact of birth mode on microbiome diversity
Source: PubMed Central journal article supplement (PMC5944432; doi:10.7717/peerj.4694), 2018-05-07
Supplement: peerj-06-4694-s007.pdf [file peerj-06-4694-s007.pdf]

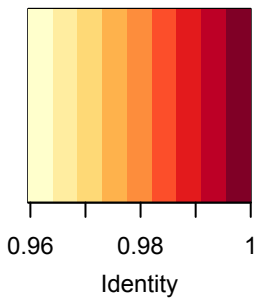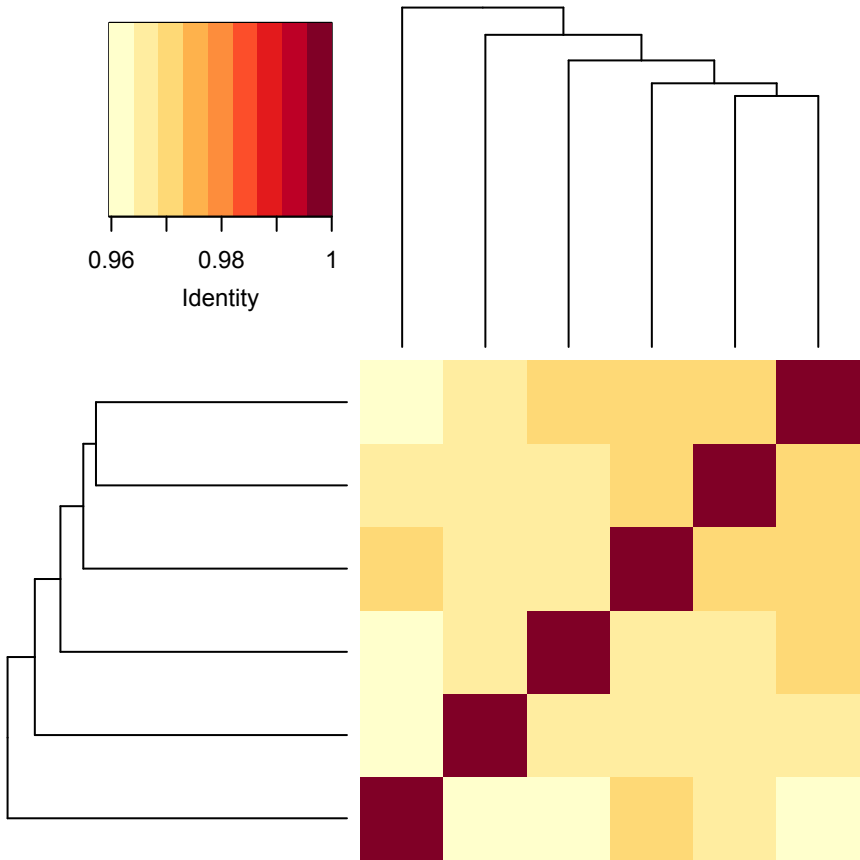

IM008 CrAssphage  
 Reyes et al. CrAssphage  
 IM107 CrAssphage  
 Dutilh et al. CrAssphage  
 IM058 CrAssphage  
 IM117 CrAssphage

IM117 CrAssphage  
 IM058 CrAssphage  
 Dutilh et al. CrAssphage  
 IM107 CrAssphage  
 Reyes et al. CrAssphage  
 IM008 CrAssphage
