# Supplementary material for: Viromes of one year old infants reveal the impact of birth mode on microbiome diversity
Source: PubMed Central journal article supplement (PMC5944432; doi:10.7717/peerj.4694), 2018-05-07

study HMP Infant

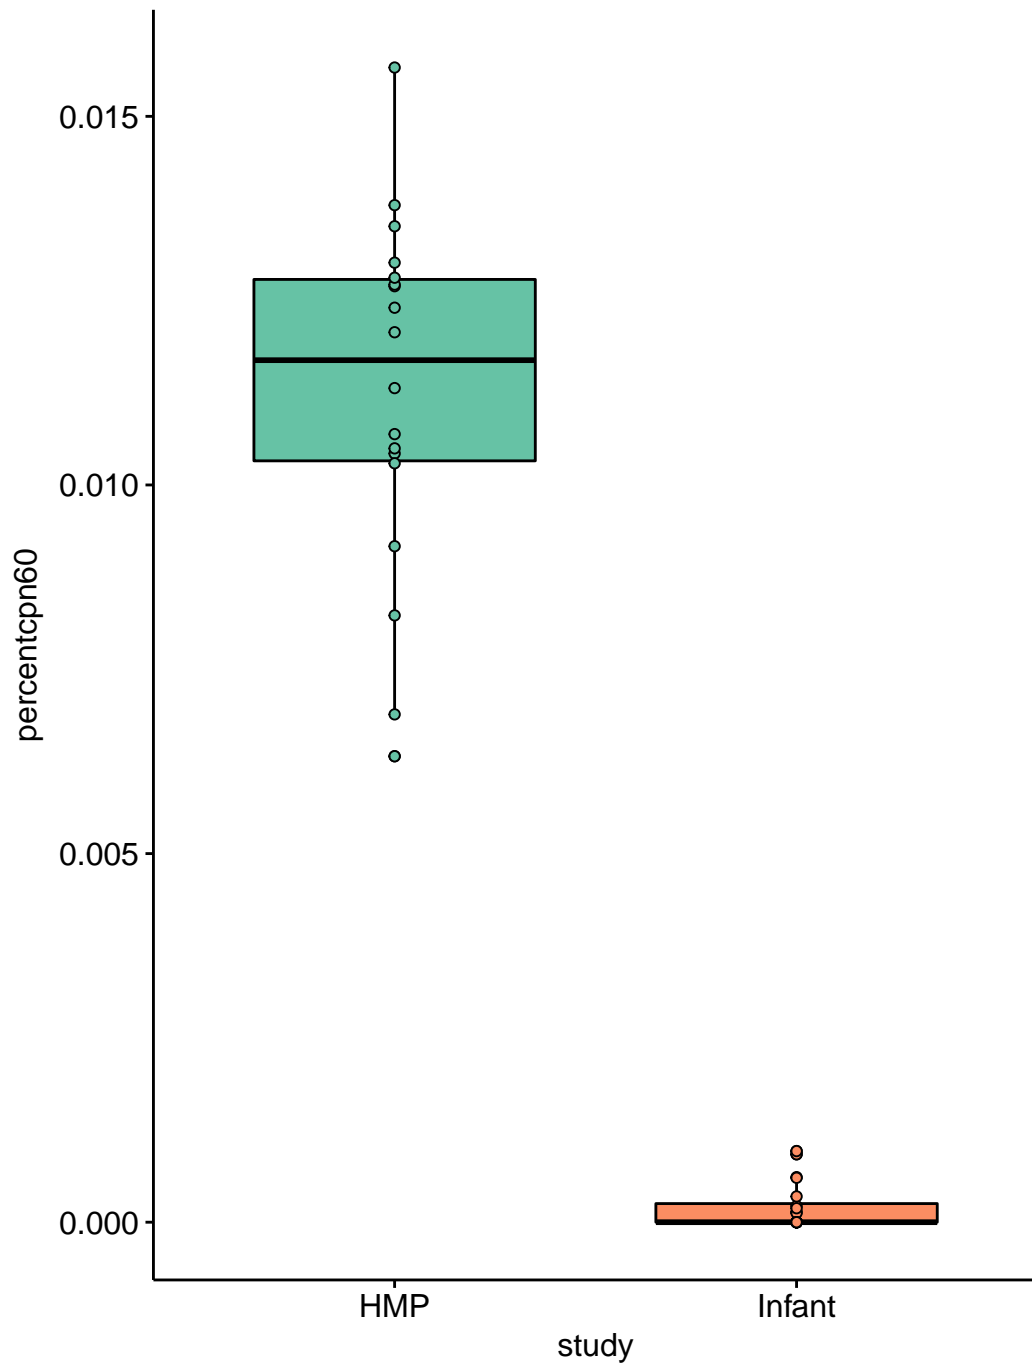

study HMP Infant

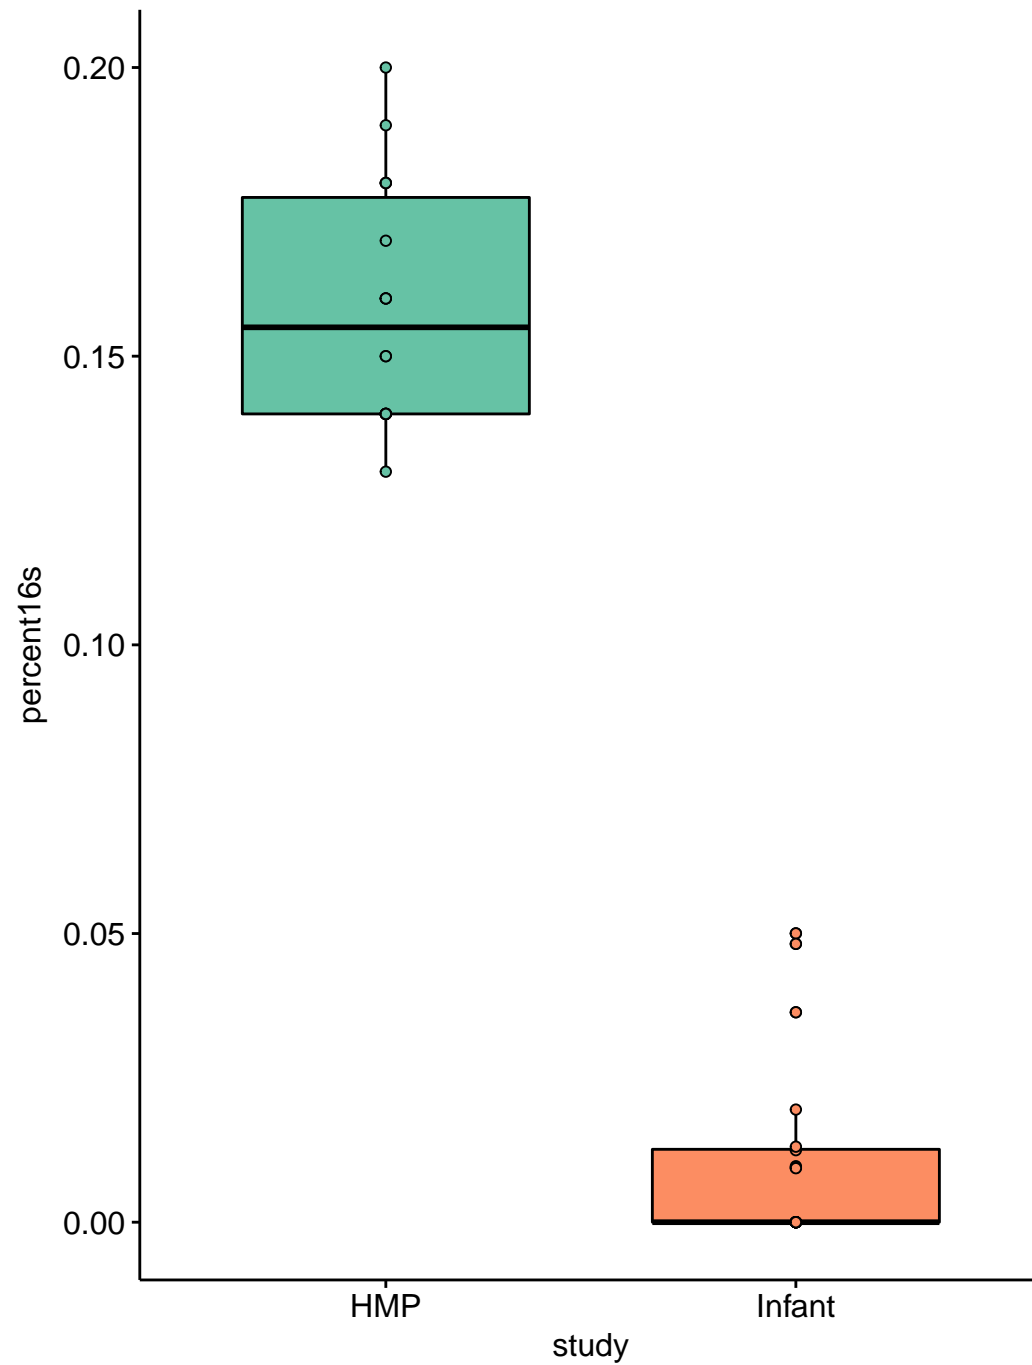

Supplement: peerj-06-4694-s008.pdf [file peerj-06-4694-s008.pdf]
