# Supplementary material for: Viromes of one year old infants reveal the impact of birth mode on microbiome diversity
Source: PubMed Central journal article supplement (PMC5944432; doi:10.7717/peerj.4694), 2018-05-07

# DNA Virome

**a**

Wilcoxon,  $p = 0.00077$

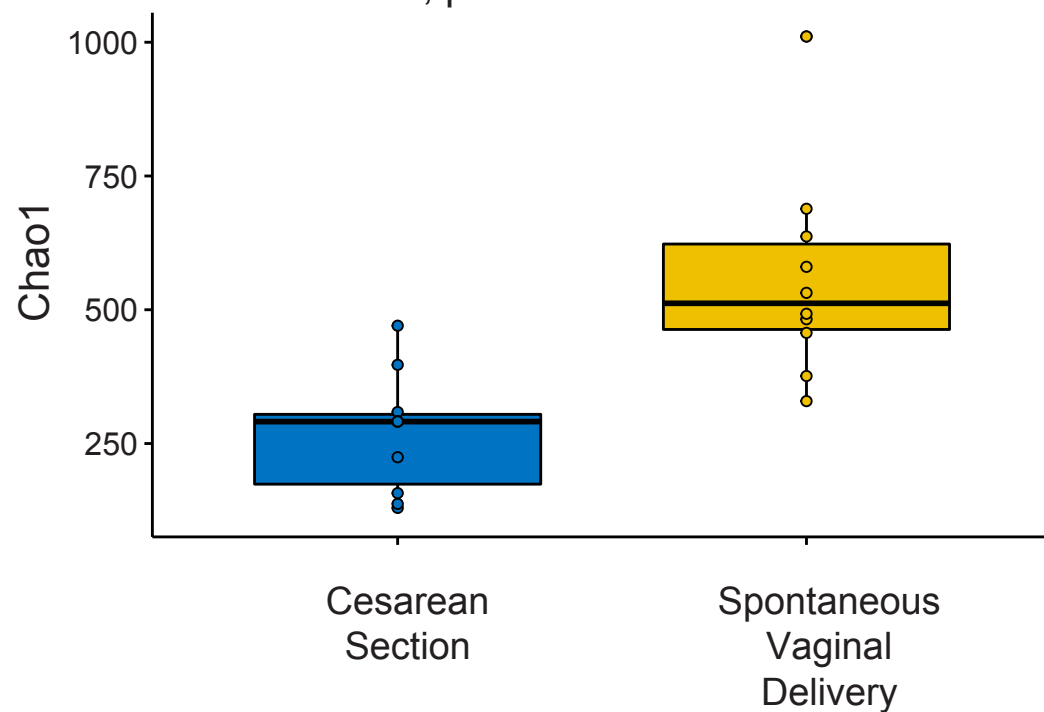

# 16S rRNA

**b**

Wilcoxon,  $p = 0.89$

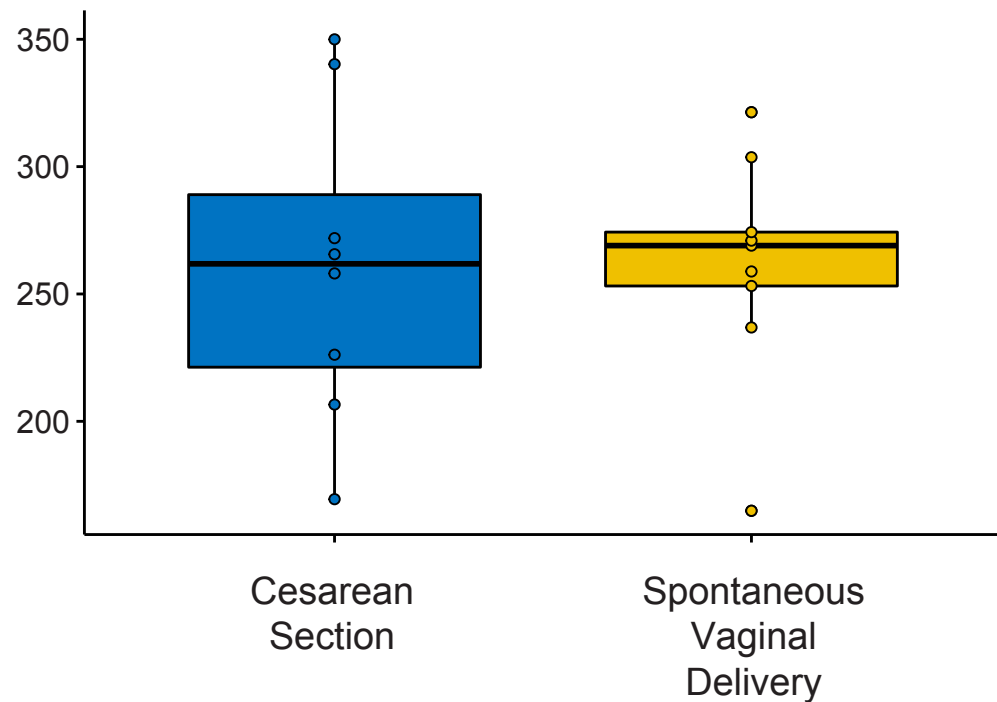

Supplement: peerj-06-4694-s009.pdf [file peerj-06-4694-s009.pdf]
