# Supplementary material for: Viromes of one year old infants reveal the impact of birth mode on microbiome diversity
Source: PeerJ. 2018 May 7;6:e4694. doi: 10.7717/peerj.4694 (PMC5944432; doi:10.7717/peerj.4694)
Supplement: Table S2 [file peerj-06-4694-s002.xlsx]

## Sheet: SupplementaryTable2
Sample ID	Raw read pairs	Percentage Human reads	Chao1	Shannon	TTV qPCR DNA conc
IM003	163695	0.158541	120	1.38285	#N/A
IM006	909184	0.00914229	476.438	0.817486	3.56744e-08
IM008	623956	0.00346444	127.69	1.06813	#N/A
IM011	829877	0.143785	450.692	2.42002	2.5903e-08
IM015	1222757	0.329361	486.769	2.61691	2.49022e-09
IM018	1258706	0.0145355	575.471	4.14686	1.42672e-08
IM057	1103358	0.00345804	301.182	1.30497	#N/A
IM058	2041773	0.0695283	632.882	3.30369	#N/A
IM061	108538	0.00594679	215.732	1.48771	#N/A
IM064	927599	0.00301835	283.636	0.453546	3.02614e-09
IM074	1430548	0.0394683	526.333	2.15463	#N/A
IM075	1423429	0.0333248	1010.61	4.54518	#N/A
IM082	403357	0.0191911	282.778	1.816	#N/A
IM104	1281983	0.00614042	283.265	1.60892	#N/A
IM107	803525	0.00224177	147.927	1.3845	6.00843e-10
IM113	1157705	0.0222771	464.243	1.08371	1.78261e-09
IM115	1036607	0.0086383	685.131	2.44269	#N/A
IM117	763737	0.0226727	390.346	1.43458	7.62396e-10
IM118	526738	0.0206613	369.154	2.581	2.86523e-09
IM125	481272	0.00691513	321.739	2.05563	3.99808e-09
