# Supplementary material for: Viromes of one year old infants reveal the impact of birth mode on microbiome diversity
Source: PeerJ. 2018 May 7;6:e4694. doi: 10.7717/peerj.4694 (PMC5944432; doi:10.7717/peerj.4694)
Supplement: Table S3 [file peerj-06-4694-s003.xlsx]

## Sheet: Sheet1
Sample ID	study	reads	percent16s	cpn60	percentcpn60
SRS012902	HMP	50986836	0.19	6888	0.0135094
SRS013158	HMP	55463878	0.14	6880	0.0124045
SRS013215	HMP	50233735	0.14	6064	0.0120716
SRS014613	HMP	52872663	0.14	5513	0.0104269
SRS014923	HMP	50229494	0.17	3460	0.00688838
SRS015854	HMP	46873931	0.13	4298	0.00916928
SRS016095	HMP	53428995	0.16	3377	0.00632054
SRS016753	HMP	51135345	0.2	8009	0.0156624
SRS017521	HMP	51185423	0.18	6662	0.0130154
SRS018575	HMP	46551042	0.14	4792	0.0102941
SRS018656	HMP	24360079	0.14	2557	0.0104967
SRS019601	HMP	51550684	0.14	6545	0.0126962
SRS020328	HMP	47128039	0.16	3879	0.00823077
SRS022137	HMP	45070299	0.15	4818	0.01069
SRS024549	HMP	44998224	0.15	5723	0.0127183
SRS045645	HMP	53212622	0.18	7341	0.0137956
SRS053398	HMP	49720886	0.18	6370	0.0128115
SRS054956	HMP	46031612	0.16	5208	0.011314
IM003	Infant	163695	0.0363626	1	0.000610892
IM006	Infant	909184	0	2	0.000219977
IM008	Infant	623956	0	0	0
IM011	Infant	829877	0	5	0.000602499
IM015	Infant	1222757	0	0	0
IM018	Infant	1258706	0.0124745	0	0
IM057	Infant	1103358	0	0	0
IM058	Infant	2041773	0.00969385	0	0
IM061	Infant	108538	0.0130829	1	0.000921336
IM064	Infant	927599	0	0	0
IM074	Infant	1430548	0.0195052	5	0.000349516
IM075	Infant	1423429	0.00941379	2	0.000140506
IM082	Infant	403357	0	0	0
IM104	Infant	1281983	0	0	0
IM107	Infant	803525	0	1	0.000124452
IM113	Infant	1157705	0.0093564	0	0
IM115	Infant	1036607	0.0500248	10	0.000964686
IM117	Infant	763737	0	0	0
IM118	Infant	526738	0.0482096	1	0.000189848
IM125	Infant	481272	0	0	0
