# Supplementary material for: Viromes of one year old infants reveal the impact of birth mode on microbiome diversity
Source: PeerJ. 2018 May 7;6:e4694. doi: 10.7717/peerj.4694 (PMC5944432; doi:10.7717/peerj.4694)
Supplement: Table S4 — Table containing annotation for each assembled sequence used in this study - ID, top BLASTn hit in the nt database, circular, size, coverage. [file peerj-06-4694-s004.xlsx]

## Sheet: SupplementaryTable4
Contig	Length	Top hit nt	E value	Percent ID	Length of alignment (bases)	Circular	Coverage
APC_IM_vircontig_1	146589	Lachnoclostridium sp. YL32, complete genome	2e-27	88.1	126	No	160.278
APC_IM_vircontig_10	69343	No hit	No hit	No hit	No hit	No	104.476
APC_IM_vircontig_100	26982	Bacteroides dorei isolate HS1_L_1_B_010, complete genome	0	96.29	6389	No	102.158
APC_IM_vircontig_1000	2388	Unidentified phage clone 2210_scaffold709 genomic sequence	0	99.32	2339	No	57.6488
APC_IM_vircontig_1001	2388	Torque teno virus isolate P19-3 ORF1 gene, complete cds	0	85.12	2352	No	50.7688
APC_IM_vircontig_1002	2381	Enterococcus faecium strain E232 chromosome, complete genome	2e-20	98.44	64	No	173.874
APC_IM_vircontig_1003	2375	No hit	No hit	No hit	No hit	No	66.0157
APC_IM_vircontig_1004	2374	Bacteroides vulgatus strain mpk genome	5e-17	100	55	No	17.0046
APC_IM_vircontig_1005	2373	Escherichia coli strain C7, complete genome	0	100	2373	No	37.0842
APC_IM_vircontig_1006	2371	Lactococcus phage 936 group phage PhiS0139, complete genome	0	92.35	1333	No	24.6658
APC_IM_vircontig_1007	2364	Enterobacter hormaechei subsp. oharae strain 34978, complete genome	0	94.88	2365	No	27.4964
APC_IM_vircontig_1008	2363	Bacteroides caccae strain ATCC 43185, complete genome	3e-93	95.5	222	No	205.167
APC_IM_vircontig_1009	2347	Lactococcus phage 936 group phage Phi129, complete genome	0	99.19	2347	No	38.0145
APC_IM_vircontig_101	26816	Morganella morganii strain FDAARGOS_365 chromosome, complete genome	0	94.3	10816	No	65.458
APC_IM_vircontig_1010	2344	No hit	No hit	No hit	No hit	No	86.8571
APC_IM_vircontig_1011	2343	Lactococcus phage R31, complete genome	0	94.97	1293	No	113.38
APC_IM_vircontig_1012	2341	No hit	No hit	No hit	No hit	No	36.2755
APC_IM_vircontig_1013	2340	No hit	No hit	No hit	No hit	No	26.5871
APC_IM_vircontig_1014	2334	Torque teno mini virus 7 DNA, complete genome, isolate: TLMV-CLC156	2e-75	85.32	293	No	93.2027
APC_IM_vircontig_1015	2328	Torque teno midi virus 2 DNA, complete genome, isolate: MD2-013	4e-152	75.91	1158	No	17.5933
APC_IM_vircontig_1016	2327	No hit	No hit	No hit	No hit	No	135.994
APC_IM_vircontig_1017	2319	No hit	No hit	No hit	No hit	No	30.4298
APC_IM_vircontig_1018	2317	No hit	No hit	No hit	No hit	No	481.209
APC_IM_vircontig_1019	2315	Faecalibacterium prausnitzii L2/6 draft genome	0	97.62	2269	No	18.7325
APC_IM_vircontig_102	26777	Bifidobacterium longum subsp. infantis genome assembly Bifidobacterium longum subsp. infantis CECT7210, chromosome : I	0	96.07	5726	No	257.956
APC_IM_vircontig_1020	2313	Sewage-associated gemycircularvirus-10b isolate BS3849, complete sequence	0	83.46	1747	No	149.231
APC_IM_vircontig_1021	2309	Sewage-associated gemycircularvirus-10b isolate BS3849, complete sequence	0	98.35	2188	No	54.2113
APC_IM_vircontig_1022	2306	No hit	No hit	No hit	No hit	No	19.2292
APC_IM_vircontig_1023	2305	No hit	No hit	No hit	No hit	No	66.1583
APC_IM_vircontig_1024	2303	No hit	No hit	No hit	No hit	No	92.0751
APC_IM_vircontig_1025	2294	Escherichia coli strain ECONIH2, complete genome	0	97.09	1583	No	185.462
APC_IM_vircontig_1026	2292	Lactococcus phage 936 group phage PhiF0139, complete genome	0	91.62	2292	No	123.205
APC_IM_vircontig_1027	2288	No hit	No hit	No hit	No hit	No	45.1944
APC_IM_vircontig_1028	2287	No hit	No hit	No hit	No hit	No	21.6164
APC_IM_vircontig_1029	2283	No hit	No hit	No hit	No hit	No	12.9637
APC_IM_vircontig_103	26731	No hit	No hit	No hit	No hit	No	249.271
APC_IM_vircontig_1030	2280	Enterococcus faecium strain E1, complete genome	0	98.77	2280	No	40.3965
APC_IM_vircontig_1031	2278	Lactococcus phage P680, complete genome	0	94.69	2280	No	28.1796
APC_IM_vircontig_1032	2276	Lactococcus phage bIBB29, complete genome	0	94.07	2276	No	86.8339
APC_IM_vircontig_1033	2275	No hit	No hit	No hit	No hit	No	415.023
APC_IM_vircontig_1034	2275	No hit	No hit	No hit	No hit	No	19.5239
APC_IM_vircontig_1035	2269	Lactococcus phage bIBB29, complete genome	0	93.74	1710	No	1911.24
APC_IM_vircontig_1036	2267	No hit	No hit	No hit	No hit	No	48.0301
APC_IM_vircontig_1037	2265	Streptococcus suis strain AH681 chromosome, complete genome	7e-20	73.21	336	No	388.078
APC_IM_vircontig_1038	2255	No hit	No hit	No hit	No hit	No	12.6872
APC_IM_vircontig_1039	2254	Lactococcus phage 936 group phage PhiF.17, complete genome	0	96.18	2254	No	469.987
APC_IM_vircontig_104	26676	Enterococcus durans strain BDGP3, complete genome	0	77.22	5176	No	190.061
APC_IM_vircontig_1040	2254	No hit	No hit	No hit	No hit	No	9.51759
APC_IM_vircontig_1041	2243	Bifidobacterium breve strain 180W83 chromosome, complete genome	0	83.5	709	No	367.254
APC_IM_vircontig_1042	2237	Lactococcus phage 936 group phage PhiLj, complete genome	0	96.64	2232	No	99.4139
APC_IM_vircontig_1043	2232	No hit	No hit	No hit	No hit	No	53.3807
APC_IM_vircontig_1044	2229	Faecalibacterium prausnitzii L2/6 draft genome	0	96.86	2200	No	11.5581
APC_IM_vircontig_1045	2224	No hit	No hit	No hit	No hit	No	80.0989
APC_IM_vircontig_1046	2224	No hit	No hit	No hit	No hit	No	97.0153
APC_IM_vircontig_1047	2221	Candidatus Saccharibacteria oral taxon TM7x, complete genome	1e-87	81.25	416	No	22.5414
APC_IM_vircontig_1048	2216	No hit	No hit	No hit	No hit	No	9.40718
APC_IM_vircontig_1049	2213	Leuconostoc phage phiLN12, complete genome	0	99.1	2213	No	25.354
APC_IM_vircontig_105	26314	Candidatus Saccharibacteria oral taxon TM7x, complete genome	0	80.73	11548	No	21.1273
APC_IM_vircontig_1050	2211	No hit	No hit	No hit	No hit	No	15.9019
APC_IM_vircontig_1051	2211	No hit	No hit	No hit	No hit	No	10.8799
APC_IM_vircontig_1052	2203	Giant panda associated gemycircularvirus strain gpge002, complete genome	0	87.98	749	No	23.1345
APC_IM_vircontig_1053	2198	Faecalibacterium prausnitzii L2/6 draft genome	0	93.81	970	No	8.31169
APC_IM_vircontig_1054	2196	Bifidobacterium longum subsp. longum GT15, complete genome	0	99.4	2178	No	13.6417
APC_IM_vircontig_1055	2192	Escherichia coli strain E62, complete genome	0	98.61	1871	No	265.527
APC_IM_vircontig_1056	2188	No hit	No hit	No hit	No hit	No	53.8115
APC_IM_vircontig_1057	2185	Bifidobacterium breve strain NRBB09 chromosome, complete genome	0	96.02	2138	No	23.1262
APC_IM_vircontig_1058	2184	No hit	No hit	No hit	No hit	No	18.8213
APC_IM_vircontig_1059	2183	Lactococcus phage 712, complete genome	0	91.04	1384	No	12.3001
APC_IM_vircontig_106	25939	Bifidobacterium breve strain 082W48 chromosome, complete genome	0	92.33	5555	No	19.7102
APC_IM_vircontig_1060	2182	No hit	No hit	No hit	No hit	No	350.135
APC_IM_vircontig_1061	2182	Chicken stool-associated gemycircularvirus strain RS/BR/2015, complete genome	0	86.31	2009	No	52.5512
APC_IM_vircontig_1062	2180	No hit	No hit	No hit	No hit	No	30.2516
APC_IM_vircontig_1063	2177	Chicken stool-associated gemycircularvirus strain RS/BR/2015, complete genome	0	94.68	2163	No	16.6834
APC_IM_vircontig_1064	2176	Faecalibacterium prausnitzii L2/6 draft genome	0	95.98	2163	No	18.5929
APC_IM_vircontig_1065	2175	No hit	No hit	No hit	No hit	No	10.8174
APC_IM_vircontig_1066	2168	No hit	No hit	No hit	No hit	No	205.617
APC_IM_vircontig_1067	2160	Lactococcus phage M6654, complete genome	0	94.11	2003	No	11.3931
APC_IM_vircontig_1068	2158	No hit	No hit	No hit	No hit	No	10.593
APC_IM_vircontig_1069	2156	No hit	No hit	No hit	No hit	No	54.7688
APC_IM_vircontig_107	25676	Bifidobacterium longum subsp. longum strain AH1206, complete genome	0	99.31	8402	No	263.077
APC_IM_vircontig_1070	2153	Bifidobacterium kashiwanohense PV20-2, complete genome	0	79.71	2149	No	18.0465
APC_IM_vircontig_1071	2152	Lactococcus Phage ASCC191, complete genome	0	92.07	1085	No	63.8578
APC_IM_vircontig_1072	2150	No hit	No hit	No hit	No hit	No	11.7172
APC_IM_vircontig_1073	2149	Human gut gokushovirus isolate SH-CHD14, complete genome	2e-145	75.1	1253	No	32.4022
APC_IM_vircontig_1074	2139	No hit	No hit	No hit	No hit	No	10.5506
APC_IM_vircontig_1075	2138	Gemycircularvirus HV-GcV1, complete genome	0	99.9	2086	No	9.22731
APC_IM_vircontig_1076	2130	Candidatus Saccharibacteria bacterium RAAC3_TM7_1, complete genome	1e-37	74.46	415	No	31.5212
APC_IM_vircontig_1077	2129	No hit	No hit	No hit	No hit	No	202.278
APC_IM_vircontig_1078	2127	No hit	No hit	No hit	No hit	No	64.7656
APC_IM_vircontig_1079	2125	Lactococcus phage 340, complete genome	0	98.82	2125	No	78.5192
APC_IM_vircontig_108	25554	No hit	No hit	No hit	No hit	No	12.2917
APC_IM_vircontig_1080	2122	No hit	No hit	No hit	No hit	No	285.335
APC_IM_vircontig_1081	2122	No hit	No hit	No hit	No hit	No	12.9556
APC_IM_vircontig_1082	2117	No hit	No hit	No hit	No hit	No	66.3202
APC_IM_vircontig_1083	2114	No hit	No hit	No hit	No hit	No	81.4467
APC_IM_vircontig_1084	2109	No hit	No hit	No hit	No hit	No	32.3771
APC_IM_vircontig_1085	2108	No hit	No hit	No hit	No hit	No	18.5497
APC_IM_vircontig_1086	2107	No hit	No hit	No hit	No hit	No	16.7897
APC_IM_vircontig_1087	2105	No hit	No hit	No hit	No hit	No	8.86415
APC_IM_vircontig_1088	2100	No hit	No hit	No hit	No hit	No	73.9896
APC_IM_vircontig_1089	2098	No hit	No hit	No hit	No hit	No	22.5153
APC_IM_vircontig_109	25492	Klebsiella pneumoniae strain UCLAOXA232KP, complete genome	0	92.33	10141	No	27.6579
APC_IM_vircontig_1090	2096	Escherichia phage HK639, complete genome	0	92.59	1012	No	24.2655
APC_IM_vircontig_1091	2091	Escherichia coli strain Ecol_542, complete genome	0	98.1	896	No	45.3955
APC_IM_vircontig_1092	2086	Brevibacillus laterosporus DSM 25, complete genome	2e-55	78.2	367	No	8.42991
APC_IM_vircontig_1093	2083	TTV-like mini virus DNA, complete genome, isolate: TLMV-CBD231	5e-26	86.4	125	No	188.401
APC_IM_vircontig_1094	2082	No hit	No hit	No hit	No hit	No	18.767
APC_IM_vircontig_1095	2081	No hit	No hit	No hit	No hit	No	16.1537
APC_IM_vircontig_1096	2080	Torque teno virus isolate P1-2 ORF1 gene, complete cds	1e-71	86.87	259	No	8.93336
APC_IM_vircontig_1097	2076	Lactococcus phage 936 group phage PhiL.6, complete genome	0	97.83	1845	No	10.554
APC_IM_vircontig_1098	2073	Bacteroides caccae strain ATCC 43185, complete genome	3e-158	82.42	654	No	11.7783
APC_IM_vircontig_1099	2073	Escherichia coli strain M9, complete genome	0	98.11	2066	No	52.653
APC_IM_vircontig_11	69142	Enterococcus faecium strain E1, complete genome	0	98.55	1652	No	38.142
APC_IM_vircontig_110	25009	No hit	No hit	No hit	No hit	No	14.0416
APC_IM_vircontig_1100	2064	Odonata-associated circular virus-17 isolate OdasCV-17-US-1619LM1-12, complete genome	0	88.13	935	No	33.1456
APC_IM_vircontig_1101	2061	Bacteroides dorei isolate HS2_L_2_B_045b, complete genome	0	97.48	1070	No	11.6386
APC_IM_vircontig_1102	2057	Torque teno mini virus 2 DNA, complete genome, isolate: TLMV-NLC023	0	81.23	2073	No	13.1373
APC_IM_vircontig_1103	2054	No hit	No hit	No hit	No hit	No	14.2352
APC_IM_vircontig_1104	2051	Klebsiella phage KPP5665-2, complete genome	0	99.76	2051	No	25.1752
APC_IM_vircontig_1105	2047	Microcella alkaliphila DNA, complete genome, strain: JAM AC0309	5e-06	87.93	58	No	6.24725
APC_IM_vircontig_1106	2044	No hit	No hit	No hit	No hit	No	11.0661
APC_IM_vircontig_1107	2037	Lactococcus phage 936 group phage PhiA1127, complete genome	0	95.39	867	No	29.525
APC_IM_vircontig_1108	2035	No hit	No hit	No hit	No hit	No	149.023
APC_IM_vircontig_1109	2034	No hit	No hit	No hit	No hit	No	56.4889
APC_IM_vircontig_111	24749	Staphylococcus aureus subsp. aureus ED133, complete genome	3e-53	81.1	291	No	15.4059
APC_IM_vircontig_1110	2030	No hit	No hit	No hit	No hit	No	328.936
APC_IM_vircontig_1111	2030	Lactococcus phage bIL67, complete genome	0	88.95	1918	No	6.74394
APC_IM_vircontig_1112	2028	No hit	No hit	No hit	No hit	No	11.5105
APC_IM_vircontig_1113	2028	No hit	No hit	No hit	No hit	No	89.8215
APC_IM_vircontig_1114	2025	Klebsiella pneumoniae strain Kp_Goe_822579 plasmid pKp_Goe_579-5, complete sequence	0	99.55	1988	No	55.3402
APC_IM_vircontig_1115	2024	No hit	No hit	No hit	No hit	No	17.1554
APC_IM_vircontig_1116	2023	Human adenovirus C strain human/USA/Pitts_00109/1992/2[P2H2F2], complete genome	0	99.95	2010	No	10.4964
APC_IM_vircontig_1117	2022	No hit	No hit	No hit	No hit	No	14.5509
APC_IM_vircontig_1118	2021	Lactococcus phage 936 group phage PhiS0139, complete genome	0	88.88	1421	No	12.5113
APC_IM_vircontig_1119	2018	No hit	No hit	No hit	No hit	No	17.0776
APC_IM_vircontig_112	24690	Veillonella parvula strain UTDB1-3, complete genome	0	90.39	17749	No	13.6403
APC_IM_vircontig_1120	2015	Flavonifractor plautii strain YL31, complete genome	2e-19	86.36	110	No	28.426
APC_IM_vircontig_1121	2012	Clostridium phage phiCT9441A, complete genome	1e-06	87.72	57	No	20.3919
APC_IM_vircontig_1122	2011	Uncultured prokaryote from Rat gut metagenome metamobilome, isolate RGRH0163	3e-177	86.4	581	No	28.8988
APC_IM_vircontig_1123	2009	No hit	No hit	No hit	No hit	No	30.3399
APC_IM_vircontig_1124	2008	No hit	No hit	No hit	No hit	No	11.8614
APC_IM_vircontig_1125	2008	Faecalibacterium prausnitzii strain Indica chromosome, complete genome	0	93.48	844	No	22.5969
APC_IM_vircontig_1126	2001	No hit	No hit	No hit	No hit	No	9.92235
APC_IM_vircontig_1127	1998	Candidatus Saccharibacteria oral taxon TM7x, complete genome	4e-42	89.4	151	No	18.0705
APC_IM_vircontig_1128	1997	Unidentified phage clone 2020_scaffold1264 genomic sequence	0	91.09	1627	No	9.43773
APC_IM_vircontig_1129	1997	No hit	No hit	No hit	No hit	No	12.393
APC_IM_vircontig_113	24641	Enterococcus faecalis ATCC 29212, complete genome	0	94.79	12823	No	7.25068
APC_IM_vircontig_1130	1995	Torque teno midi virus 1 DNA, complete genome, isolate: MD1-073	0	80.51	867	No	13.1899
APC_IM_vircontig_1131	1992	No hit	No hit	No hit	No hit	No	14.8722
APC_IM_vircontig_1132	1992	Lactococcus phage M6654, complete genome	0	90.4	1229	No	31.1436
APC_IM_vircontig_1133	1984	Citrobacter freundii strain B38, complete genome	0	92.26	1472	No	36.6186
APC_IM_vircontig_1134	1983	Enterobacter cloacae strain AR_0136, complete genome	0	99.46	1113	No	43.0647
APC_IM_vircontig_1135	1982	Enterococcus durans strain KLDS 6.0930, complete genome	0	84.57	1789	No	17.362
APC_IM_vircontig_1136	1979	Enterococcus faecium strain E232 chromosome, complete genome	1e-32	88.28	128	No	328.051
APC_IM_vircontig_1137	1977	Bacteroides caccae strain ATCC 43185, complete genome	0	83.65	1957	No	9.27611
APC_IM_vircontig_1138	1976	Faecalibacterium prausnitzii L2/6 draft genome	0	99.85	1976	No	14.4311
APC_IM_vircontig_1139	1975	Lactococcus phage SL4, complete genome	0	92	1974	No	46.3293
APC_IM_vircontig_114	24639	Enterococcus faecium strain ISMMS_VRE_4, complete genome	0	97.87	1552	No	272.295
APC_IM_vircontig_1140	1973	Citrobacter freundii CFNIH1, complete genome	0	95.77	1726	No	128.789
APC_IM_vircontig_1141	1973	Candidatus Saccharimonas aalborgensis, complete genome	0	81.09	878	No	10.075
APC_IM_vircontig_1142	1972	No hit	No hit	No hit	No hit	No	12.2272
APC_IM_vircontig_1143	1971	Lactococcus phage P008, complete genome	0	92.15	1885	No	6.01477
APC_IM_vircontig_1144	1970	No hit	No hit	No hit	No hit	No	120.369
APC_IM_vircontig_1145	1965	No hit	No hit	No hit	No hit	No	2048.77
APC_IM_vircontig_1146	1963	No hit	No hit	No hit	No hit	No	11.051
APC_IM_vircontig_1147	1962	No hit	No hit	No hit	No hit	No	22.3642
APC_IM_vircontig_1148	1959	Bifidobacterium bifidum DNA, complete genome, strain: JCM 7004	0	99.95	1958	No	10.5644
APC_IM_vircontig_1149	1958	No hit	No hit	No hit	No hit	No	7.06644
APC_IM_vircontig_115	23985	No hit	No hit	No hit	No hit	No	7.50691
APC_IM_vircontig_1150	1955	No hit	No hit	No hit	No hit	No	19.2644
APC_IM_vircontig_1151	1954	Faecalibacterium prausnitzii strain A2165 chromosome, complete genome	0	95.02	1947	No	18.246
APC_IM_vircontig_1152	1954	No hit	No hit	No hit	No hit	No	253.801
APC_IM_vircontig_1153	1953	Lactobacillus ruminis ATCC 27782, complete genome	0	78.69	1980	No	1015.91
APC_IM_vircontig_1154	1952	No hit	No hit	No hit	No hit	No	117.549
APC_IM_vircontig_1155	1951	No hit	No hit	No hit	No hit	No	21.8981
APC_IM_vircontig_1156	1948	No hit	No hit	No hit	No hit	No	8.49122
APC_IM_vircontig_1157	1948	No hit	No hit	No hit	No hit	No	10.4948
APC_IM_vircontig_1158	1948	Enterobacter hormaechei strain CAV1176, complete genome	0	97.59	1578	No	9.12517
APC_IM_vircontig_1159	1947	No hit	No hit	No hit	No hit	No	145.879
APC_IM_vircontig_116	23640	Clostridium saccharolyticum-like K10 draft genome	4e-22	86.32	117	No	25.1165
APC_IM_vircontig_1160	1945	Clostridium botulinum Ba4 str. 657, complete genome	1e-52	80.39	306	No	5058.48
APC_IM_vircontig_1161	1942	Enterococcus faecium T110, complete genome	0	98.26	1894	No	575.157
APC_IM_vircontig_1162	1942	Bifidobacterium longum strain Su859 genome assembly, chromosome: I	0	93.77	674	No	7.162
APC_IM_vircontig_1163	1938	Human adenovirus C strain human/ARG/A8649/2005/2[P2H2F2], complete genome	0	99.95	1935	No	10.6468
APC_IM_vircontig_1164	1934	Lactobacillus oris strain J-1, complete genome	9e-168	81.29	775	No	6.61713
APC_IM_vircontig_1165	1934	Clostridium butyricum strain JKY6D1 chromosome 1, complete sequence	0	91.95	671	No	2008.71
APC_IM_vircontig_1166	1932	Clostridioides difficile strain Z31 chromosome, complete genome	0	96.57	1340	No	8.26085
APC_IM_vircontig_1167	1930	Lactococcus phage CB14b, complete genome	0	91.9	1493	No	9.45953
APC_IM_vircontig_1168	1928	No hit	No hit	No hit	No hit	No	129.441
APC_IM_vircontig_1169	1923	No hit	No hit	No hit	No hit	No	8.09059
APC_IM_vircontig_117	23621	No hit	No hit	No hit	No hit	No	164.294
APC_IM_vircontig_1170	1920	No hit	No hit	No hit	No hit	No	31.3214
APC_IM_vircontig_1171	1919	No hit	No hit	No hit	No hit	No	20.3704
APC_IM_vircontig_1172	1918	Faecalibacterium prausnitzii strain Indica chromosome, complete genome	0	99.48	1918	No	15.6144
APC_IM_vircontig_1173	1914	Bacteroides vulgatus ATCC 8482, complete genome	2e-158	96.78	342	No	24.8754
APC_IM_vircontig_1174	1908	Lactococcus phage 936 group phage Phi44, complete genome	0	92.06	1549	No	13.2193
APC_IM_vircontig_1175	1907	No hit	No hit	No hit	No hit	No	26.4987
APC_IM_vircontig_1176	1901	No hit	No hit	No hit	No hit	No	7.99461
APC_IM_vircontig_1177	1898	[Clostridium] innocuum strain I46 genome	0	93.65	1702	No	16.3454
APC_IM_vircontig_1178	1896	Faecalibacterium prausnitzii strain A2165 chromosome, complete genome	7e-89	96.15	208	No	21.5239
APC_IM_vircontig_1179	1895	No hit	No hit	No hit	No hit	No	12.0936
APC_IM_vircontig_118	23484	Lactobacillus rhamnosus LOCK900, complete genome	0	95.63	10973	No	804.301
APC_IM_vircontig_1180	1890	No hit	No hit	No hit	No hit	No	8.82314
APC_IM_vircontig_1181	1890	No hit	No hit	No hit	No hit	No	14.5807
APC_IM_vircontig_1182	1889	No hit	No hit	No hit	No hit	No	11.6119
APC_IM_vircontig_1183	1887	Bacteroides dorei CL03T12C01, complete genome	0	98.01	1605	No	8.76882
APC_IM_vircontig_1184	1887	Torque teno mini virus 5 DNA, complete genome, isolate: TGP96	3e-43	79.08	282	No	9.43316
APC_IM_vircontig_1185	1886	No hit	No hit	No hit	No hit	No	7.99691
APC_IM_vircontig_1186	1884	Blautia hansenii DSM 20583, complete genome	0	98.14	1884	No	664.889
APC_IM_vircontig_1187	1882	Lactococcus phage P008, complete genome	0	89.34	1886	No	11.307
APC_IM_vircontig_1188	1881	No hit	No hit	No hit	No hit	No	468.101
APC_IM_vircontig_1189	1879	Aeromonas phage 65.2, complete genome	3e-08	84.93	73	No	7.54039
APC_IM_vircontig_119	22655	Uncultured bacterium clone AmoxDisc_TwinB_Time3_PI_203 genomic sequence	0	99.86	723	No	11.4002
APC_IM_vircontig_1190	1878	Torque teno mini virus 7 DNA, complete genome, isolate: TLMV-CLC156	3e-58	80.3	335	No	82.0831
APC_IM_vircontig_1191	1878	Enterococcus faecium strain 16-346 chromosome, complete genome	0	99.04	1878	No	12.3067
APC_IM_vircontig_1192	1876	No hit	No hit	No hit	No hit	No	6.81452
APC_IM_vircontig_1193	1876	Uncultured prokaryote from Rat gut metagenome metamobilome, isolate RGRH0126	3e-08	92.31	52	No	17.2082
APC_IM_vircontig_1194	1875	No hit	No hit	No hit	No hit	No	6.3977
APC_IM_vircontig_1195	1875	No hit	No hit	No hit	No hit	No	6.65707
APC_IM_vircontig_1196	1873	Uncultured bacterium clone CH_03A_000_Contig_22 genomic sequence	0	95.24	778	No	8.94626
APC_IM_vircontig_1197	1869	Escherichia coli strain 144 chromosome, complete genome	0	99.95	1829	No	81.5041
APC_IM_vircontig_1198	1866	No hit	No hit	No hit	No hit	No	9.24111
APC_IM_vircontig_1199	1866	Lactococcus Phage ASCC191, complete genome	0	85.09	1845	No	62.1539
APC_IM_vircontig_12	68349	Anaerostipes hadrus draft genome	6e-104	81.23	506	No	70.8793
APC_IM_vircontig_120	22526	No hit	No hit	No hit	No hit	No	12.2005
APC_IM_vircontig_1200	1865	Lactococcus Phage ASCC191, complete genome	0	86.26	1871	No	13.6581
APC_IM_vircontig_1201	1864	No hit	No hit	No hit	No hit	No	11.2918
APC_IM_vircontig_1202	1864	Enterococcus faecalis V583, complete genome	0	100	1817	No	24.076
APC_IM_vircontig_1203	1854	Lactococcus phage 936 group phage PhiM.5, complete genome	0	89.04	1442	No	25.7136
APC_IM_vircontig_1204	1852	Escherichia coli strain FORC_043, complete genome	0	99.94	1802	No	25.7691
APC_IM_vircontig_1205	1848	Lactococcus phage 936 group phage PhiA.16, complete genome	0	88.01	1852	No	144.949
APC_IM_vircontig_1206	1844	No hit	No hit	No hit	No hit	No	8.87834
APC_IM_vircontig_1207	1843	No hit	No hit	No hit	No hit	No	11.9654
APC_IM_vircontig_1208	1841	No hit	No hit	No hit	No hit	No	8.86738
APC_IM_vircontig_1209	1839	No hit	No hit	No hit	No hit	No	8.36504
APC_IM_vircontig_121	22368	Enterococcus sp. MN05 sequence complete genome	0	77.81	1460	No	54.8714
APC_IM_vircontig_1210	1838	Bacteroides fragilis 638R genome	0	99.94	1682	No	6.66107
APC_IM_vircontig_1211	1836	No hit	No hit	No hit	No hit	No	16.1696
APC_IM_vircontig_1212	1835	No hit	No hit	No hit	No hit	No	23.4197
APC_IM_vircontig_1213	1825	Uncultured organism clone 1041059766334 genomic sequence	3e-78	73.64	861	No	7.24171
APC_IM_vircontig_1214	1823	SEN virus strain D isolate BJ-2 ORF1 gene, complete cds	0	93.56	1802	No	9.50104
APC_IM_vircontig_1215	1822	No hit	No hit	No hit	No hit	No	7.88654
APC_IM_vircontig_1216	1817	Lactococcus phage D4412, complete genome	0	95.82	1819	No	9.29233
APC_IM_vircontig_1217	1816	Bifidobacterium kashiwanohense PV20-2, complete genome	0	76.07	1676	No	44.2789
APC_IM_vircontig_1218	1815	No hit	No hit	No hit	No hit	No	8.49205
APC_IM_vircontig_1219	1810	Small anellovirus KR-EB-0162 ORF1 gene, partial cds	0	99.21	379	No	6.58928
APC_IM_vircontig_122	22337	Candidatus Saccharibacteria oral taxon TM7x, complete genome	0	78.06	5005	No	8.60456
APC_IM_vircontig_1220	1809	Bacteroides dorei isolate HS2_L_2_B_045b, complete genome	0	99.3	571	No	14.2984
APC_IM_vircontig_1221	1808	No hit	No hit	No hit	No hit	No	283.659
APC_IM_vircontig_1222	1808	Escherichia coli strain 13E0780, complete genome	0	97.9	1808	No	57.7533
APC_IM_vircontig_1223	1803	TPA_exp: Clostridium difficile strain QCD-23M63 transposon Tn6073, complete sequence	0	95.28	1397	No	14.3954
APC_IM_vircontig_1224	1800	No hit	No hit	No hit	No hit	No	9.03408
APC_IM_vircontig_1225	1797	Faecalibacterium prausnitzii L2/6 draft genome	0	91.76	1784	No	337.789
APC_IM_vircontig_1226	1797	No hit	No hit	No hit	No hit	No	24.3412
APC_IM_vircontig_1227	1791	Escherichia coli UMNK88, complete genome	0	98.66	1793	No	6.3466
APC_IM_vircontig_1228	1790	Faecalibacterium prausnitzii L2/6 draft genome	0	98.12	1751	No	23.1215
APC_IM_vircontig_1229	1788	Prevotella enoeca strain F0113, complete genome	4e-31	100	80	No	8.9535
APC_IM_vircontig_123	22254	Lactococcus Phage ASCC273, complete genome	0	90.68	4476	No	12.9487
APC_IM_vircontig_1230	1787	Uncultured bacterium extrachromosomal DNA RGI01768	0	99.14	817	No	20.7823
APC_IM_vircontig_1231	1785	Lactococcus Phage ASCC191, complete genome	0	93.39	1619	No	15.4058
APC_IM_vircontig_1232	1778	Runella slithyformis DSM 19594, complete genome	1e-06	86.67	60	No	5.50288
APC_IM_vircontig_1233	1777	No hit	No hit	No hit	No hit	No	21.3459
APC_IM_vircontig_1234	1777	No hit	No hit	No hit	No hit	No	7.53843
APC_IM_vircontig_1235	1775	Bacteroides fragilis genome assembly BFBE1.1, chromosome : scaffold1	0	99.77	1773	No	6.45729
APC_IM_vircontig_1236	1774	No hit	No hit	No hit	No hit	No	6.03573
APC_IM_vircontig_1237	1771	No hit	No hit	No hit	No hit	No	8.4493
APC_IM_vircontig_1238	1768	No hit	No hit	No hit	No hit	No	4.51505
APC_IM_vircontig_1239	1767	No hit	No hit	No hit	No hit	No	10.0573
APC_IM_vircontig_124	22002	Uncultured bacterium clone HA0AAA13ZE02FM1 genomic sequence	0	97.41	696	No	51.3983
APC_IM_vircontig_1240	1766	Bifidobacterium longum subsp. longum strain CCUG30698, complete genome	0	92.34	1671	No	6.41029
APC_IM_vircontig_1241	1765	Unidentified phage clone 2210_scaffold709 genomic sequence	0	96.94	1766	No	11.9947
APC_IM_vircontig_1242	1765	Faecalibacterium prausnitzii L2/6 draft genome	0	98.92	1765	No	13.7732
APC_IM_vircontig_1243	1765	Bacteriophage bIL170, complete genome	0	91.36	926	No	26.4
APC_IM_vircontig_1244	1759	Bifidobacterium adolescentis strain BBMN23, complete genome	0	97.7	521	No	10.0023
APC_IM_vircontig_1245	1758	No hit	No hit	No hit	No hit	No	5.36609
APC_IM_vircontig_1246	1757	No hit	No hit	No hit	No hit	No	5.89375
APC_IM_vircontig_1247	1757	Bacteroides fragilis YCH46 DNA, complete genome	0	99.83	1723	No	10.4143
APC_IM_vircontig_1248	1754	No hit	No hit	No hit	No hit	No	5.98259
APC_IM_vircontig_1249	1752	Lactococcus lactis phage P475, complete genome	0	93.62	1771	No	7.57435
APC_IM_vircontig_125	21736	Clostridiales sp. SM4/1 draft genome	0	75.75	1592	No	6.59683
APC_IM_vircontig_1250	1752	Veillonella parvula strain UTDB1-3, complete genome	2e-24	84.73	131	No	6.80961
APC_IM_vircontig_1251	1750	Lactococcus phage SL4, complete genome	0	86.14	1414	No	25.7661
APC_IM_vircontig_1252	1750	Faecalibacterium prausnitzii L2/6 draft genome	0	93.77	1751	No	285.268
APC_IM_vircontig_1253	1748	No hit	No hit	No hit	No hit	No	10.3278
APC_IM_vircontig_1254	1747	No hit	No hit	No hit	No hit	No	265.508
APC_IM_vircontig_1255	1746	No hit	No hit	No hit	No hit	No	7.86832
APC_IM_vircontig_1256	1745	Enterobacter sp. E20, complete genome	0	92.06	1700	No	9.52814
APC_IM_vircontig_1257	1743	Enterobacter asburiae strain CAV1043, complete genome	0	97.82	1740	No	6.09968
APC_IM_vircontig_1258	1736	No hit	No hit	No hit	No hit	No	16.3285
APC_IM_vircontig_1259	1735	Faecalibacterium prausnitzii L2/6 draft genome	0	95.26	1623	No	28.2376
APC_IM_vircontig_126	21690	Bifidobacterium longum subsp. longum strain CCUG30698, complete genome	0	97.32	8096	No	7.67497
APC_IM_vircontig_1260	1733	Bifidobacterium phage Bbif-1, complete sequence	4e-136	85.11	497	No	339.588
APC_IM_vircontig_1261	1732	TTV-like mini virus isolate D50, complete genome	9e-38	81.52	211	No	7.10811
APC_IM_vircontig_1262	1732	No hit	No hit	No hit	No hit	No	14.5628
APC_IM_vircontig_1263	1731	No hit	No hit	No hit	No hit	No	11.1779
APC_IM_vircontig_1264	1727	Uncultured organism clone 19 genomic sequence	0	98.77	1708	No	15.0187
APC_IM_vircontig_1265	1727	Clostridioides difficile strain W0022a chromosome	0	86.77	824	No	16.067
APC_IM_vircontig_1266	1726	Leuconostoc phage phiLN04, complete genome	0	91.56	1671	No	14.4519
APC_IM_vircontig_1267	1725	Faecalibacterium prausnitzii SL3/3 draft genome	0	97.97	1331	No	6.89948
APC_IM_vircontig_1268	1724	No hit	No hit	No hit	No hit	No	12.3998
APC_IM_vircontig_1269	1724	No hit	No hit	No hit	No hit	No	19.08
APC_IM_vircontig_127	21632	Bacteroides fragilis NCTC 9343, complete genome	5e-105	77.22	698	No	10.6579
APC_IM_vircontig_1270	1723	No hit	No hit	No hit	No hit	No	7.88149
APC_IM_vircontig_1271	1721	No hit	No hit	No hit	No hit	No	8.59089
APC_IM_vircontig_1272	1720	No hit	No hit	No hit	No hit	No	11.1085
APC_IM_vircontig_1273	1719	TTV-like mini virus DNA, complete genome, isolate: TLMV-CBD231	2e-103	73.76	1147	No	7.74635
APC_IM_vircontig_1274	1719	No hit	No hit	No hit	No hit	No	17.5333
APC_IM_vircontig_1275	1718	Uncultured Lachnospiraceae bacterium clone p49C2 putative muramidase gene, complete cds	7e-39	76.73	318	No	9.0617
APC_IM_vircontig_1276	1715	Bacteroides fragilis NCTC 9343, complete genome	0	99.94	1715	No	10.1405
APC_IM_vircontig_1277	1712	No hit	No hit	No hit	No hit	No	7.24074
APC_IM_vircontig_1278	1712	No hit	No hit	No hit	No hit	No	14.4118
APC_IM_vircontig_1279	1711	Lactococcus Phage ASCC544, complete genome	0	95.06	1396	No	10.7332
APC_IM_vircontig_128	21513	Roseburia intestinalis M50/1 draft genome	0	99.82	9576	No	12.0376
APC_IM_vircontig_1280	1708	No hit	No hit	No hit	No hit	No	6.50915
APC_IM_vircontig_1281	1706	No hit	No hit	No hit	No hit	No	18.861
APC_IM_vircontig_1282	1704	Uncultured bacterium clone CH_01X_000_Contig_5 genomic sequence	7e-34	71.49	712	No	7.93325
APC_IM_vircontig_1283	1703	Lactococcus phage 936 group phage PhiD.18, complete genome	0	93.77	1702	No	71.3155
APC_IM_vircontig_1284	1702	Human adenovirus C strain human/USA/Pitts_00109/1992/2[P2H2F2], complete genome	0	100	1653	No	6.61681
APC_IM_vircontig_1285	1700	Lactococcus phage 936 group phage Phi43, complete genome	0	95.4	1653	No	6.6271
APC_IM_vircontig_1286	1696	No hit	No hit	No hit	No hit	No	20.5099
APC_IM_vircontig_1287	1694	No hit	No hit	No hit	No hit	No	5.04929
APC_IM_vircontig_1288	1691	No hit	No hit	No hit	No hit	No	9.01126
APC_IM_vircontig_1289	1690	No hit	No hit	No hit	No hit	No	4.58505
APC_IM_vircontig_129	21316	No hit	No hit	No hit	No hit	No	9.64112
APC_IM_vircontig_1290	1690	Candidatus Saccharibacteria oral taxon TM7x, complete genome	0	80.69	1134	No	41.0093
APC_IM_vircontig_1291	1689	No hit	No hit	No hit	No hit	No	7.42473
APC_IM_vircontig_1292	1689	No hit	No hit	No hit	No hit	No	21.4187
APC_IM_vircontig_1293	1688	No hit	No hit	No hit	No hit	No	5.92377
APC_IM_vircontig_1294	1687	Uncultured bacterium DNA fragment active on fructooligosaccharide and inulin substrate, clone MetaPbio_Contig1	4e-136	93.45	336	No	6.46152
APC_IM_vircontig_1295	1685	Escherichia coli strain 144 chromosome, complete genome	0	99.7	1685	No	14.9461
APC_IM_vircontig_1296	1679	Bacteroides vulgatus ATCC 8482, complete genome	0	99.51	1443	No	18.2418
APC_IM_vircontig_1297	1679	No hit	No hit	No hit	No hit	No	20.3319
APC_IM_vircontig_1298	1678	Uncultured organism clone 20 genomic sequence	0	97.08	1679	No	9.95972
APC_IM_vircontig_1299	1674	No hit	No hit	No hit	No hit	No	9.78803
APC_IM_vircontig_13	62010	Fusobacterium nucleatum subsp. polymorphum genome assembly NCTC10562, chromosome : 1	1e-79	71.24	1742	No	9.55103
APC_IM_vircontig_130	20966	Blautia hansenii DSM 20583, complete genome	8e-103	92.36	275	No	6.73095
APC_IM_vircontig_1300	1672	Bacteroides caccae strain ATCC 43185, complete genome	0	85.24	1186	No	4.59121
APC_IM_vircontig_1301	1671	No hit	No hit	No hit	No hit	No	13.6662
APC_IM_vircontig_1302	1671	No hit	No hit	No hit	No hit	No	6.99291
APC_IM_vircontig_1303	1667	TPA_exp: Clostridium difficile strain QCD-23M63 transposon Tn6073, complete sequence	0	96.46	1667	No	5.47616
APC_IM_vircontig_1304	1664	Clostridium saccharoperbutylacetonicum strain N1-504, complete genome	3e-137	73.35	1497	No	8.23284
APC_IM_vircontig_1305	1664	Lactococcus phage M6165, complete genome	0	96.94	1664	No	10.3034
APC_IM_vircontig_1306	1662	No hit	No hit	No hit	No hit	No	6.06589
APC_IM_vircontig_1307	1661	No hit	No hit	No hit	No hit	No	380.459
APC_IM_vircontig_1308	1660	No hit	No hit	No hit	No hit	No	5.06238
APC_IM_vircontig_1309	1657	Faecalibacterium prausnitzii L2/6 draft genome	0	98.73	1660	No	11.9825
APC_IM_vircontig_131	20794	Bifidobacterium breve strain DRBB30 chromosome, complete genome	0	99.02	8572	No	7.85354
APC_IM_vircontig_1310	1653	No hit	No hit	No hit	No hit	No	5.50475
APC_IM_vircontig_1311	1653	No hit	No hit	No hit	No hit	No	5.70007
APC_IM_vircontig_1312	1649	Lactococcus phage SL4, complete genome	0	93.33	1034	No	7.12916
APC_IM_vircontig_1313	1648	No hit	No hit	No hit	No hit	No	6.18973
APC_IM_vircontig_1314	1647	Uncultured bacterium extrachromosomal DNA RGF00104	0	98.94	1409	No	7.04282
APC_IM_vircontig_1315	1646	Bifidobacterium adolescentis strain BBMN23, complete genome	0	98.69	685	No	8.2228
APC_IM_vircontig_1316	1644	Enterococcus faecium strain ISMMS_VRE_1, complete genome	0	99.45	1639	No	55.4485
APC_IM_vircontig_1317	1643	No hit	No hit	No hit	No hit	No	11.9853
APC_IM_vircontig_1318	1642	Lactococcus Phage ASCC191, complete genome	0	89.12	1498	No	4.21451
APC_IM_vircontig_1319	1639	No hit	No hit	No hit	No hit	No	7.18515
APC_IM_vircontig_132	20509	Bifidobacterium longum subsp. longum strain NCIMB8809, complete genome	0	99.82	16868	No	14.8923
APC_IM_vircontig_1320	1639	No hit	No hit	No hit	No hit	No	7.2773
APC_IM_vircontig_1321	1638	Lactococcus phage R31, complete genome	0	92.2	1641	No	5.94942
APC_IM_vircontig_1322	1638	No hit	No hit	No hit	No hit	No	8.86706
APC_IM_vircontig_1323	1636	Faecalibacterium prausnitzii strain Indica chromosome, complete genome	0	91.25	1635	No	15.1437
APC_IM_vircontig_1324	1636	No hit	No hit	No hit	No hit	No	7.86808
APC_IM_vircontig_1325	1635	Lactococcus phage 936 group phage Phi155, complete genome	0	88.91	1118	No	5.03143
APC_IM_vircontig_1326	1635	Lactococcus phage P680, complete genome	0	91.69	1636	No	19.5346
APC_IM_vircontig_1327	1632	Faecalibacterium prausnitzii L2/6 draft genome	0	94.28	1294	No	7.99159
APC_IM_vircontig_1328	1630	No hit	No hit	No hit	No hit	No	6.82664
APC_IM_vircontig_1329	1630	No hit	No hit	No hit	No hit	No	8.61042
APC_IM_vircontig_133	20489	Enterococcus mundtii strain DSM 4838, complete genome	0	80.42	2600	No	6.78232
APC_IM_vircontig_1330	1628	Torque teno mini virus 5 DNA, complete genome, isolate: TGP96	2e-23	92.05	88	No	86.3056
APC_IM_vircontig_1331	1626	Candidatus Saccharibacteria oral taxon TM7x, complete genome	1e-111	86.9	374	No	128.576
APC_IM_vircontig_1332	1624	No hit	No hit	No hit	No hit	No	8.0747
APC_IM_vircontig_1333	1620	Alistipes finegoldii DSM 17242, complete genome	0	99.17	1575	No	6.62072
APC_IM_vircontig_1334	1619	No hit	No hit	No hit	No hit	No	5.84386
APC_IM_vircontig_1335	1618	No hit	No hit	No hit	No hit	No	4.15284
APC_IM_vircontig_1336	1617	No hit	No hit	No hit	No hit	No	4.13682
APC_IM_vircontig_1337	1611	Chimpanzee anellovirus isolate Cpz1cl2 nonfunctional ORF2 gene, complete sequence; and ORF1 and ORF3 genes, complete cds	9e-08	77.24	123	No	193.318
APC_IM_vircontig_1338	1611	No hit	No hit	No hit	No hit	No	11.0631
APC_IM_vircontig_1339	1607	Escherichia coli JJ1886 plasmid pJJ1886_1, complete sequence	0	99.72	1447	No	438.676
APC_IM_vircontig_134	20474	Enterococcus faecalis D32, complete genome	0	91.78	4345	No	5.30341
APC_IM_vircontig_1340	1607	Bacteroides fragilis strain S14, complete genome	0	99.69	1607	No	6.54217
APC_IM_vircontig_1341	1603	Escherichia coli genome assembly FHI43, scaffold scaffold-11_contig-6.0_1_293445_[organism:Escherichia	0	97.94	1603	No	89.4988
APC_IM_vircontig_1342	1603	No hit	No hit	No hit	No hit	No	133.847
APC_IM_vircontig_1343	1600	Lactococcus phage jm2, complete genome	2e-159	92.01	413	No	64.6407
APC_IM_vircontig_1344	1596	No hit	No hit	No hit	No hit	No	8.96543
APC_IM_vircontig_1345	1596	Lachnoclostridium sp. YL32, complete genome	8e-53	74.53	530	No	8.23362
APC_IM_vircontig_1346	1596	No hit	No hit	No hit	No hit	No	18.408
APC_IM_vircontig_1347	1594	Bacteroides dorei isolate HS1_L_1_B_010, complete genome	0	88.87	1087	No	12.6342
APC_IM_vircontig_1348	1593	No hit	No hit	No hit	No hit	No	5.03407
APC_IM_vircontig_1349	1590	Bacteriophage Tuc2009, complete genome	0	93.72	1227	No	10.0043
APC_IM_vircontig_135	20359	Lactobacillus rhamnosus strain 4B15, complete genome	0	96.2	6850	No	109.928
APC_IM_vircontig_1350	1589	Bifidobacterium longum subsp. longum strain AH1206, complete genome	0	95.19	1080	No	7.15435
APC_IM_vircontig_1351	1585	Uncultured crAssphage, complete genome	0	99.06	1063	No	92.15
APC_IM_vircontig_1352	1584	No hit	No hit	No hit	No hit	No	108.442
APC_IM_vircontig_1353	1584	[Eubacterium] hallii isolate EH1 genome assembly, chromosome: I	0	98.91	1556	No	6.09852
APC_IM_vircontig_1354	1584	Lactococcus phage 936 group phage Phi10.5, complete genome	0	96.89	803	No	8.70674
APC_IM_vircontig_1355	1583	Leuconostoc phage phiLN04, complete genome	0	97.85	789	No	8.70603
APC_IM_vircontig_1356	1582	Bifidobacterium breve strain DRBB28 chromosome, complete genome	0	99.62	1582	No	7.60274
APC_IM_vircontig_1357	1579	No hit	No hit	No hit	No hit	No	35.2356
APC_IM_vircontig_1358	1579	No hit	No hit	No hit	No hit	No	11.3426
APC_IM_vircontig_1359	1577	Prevotella dentalis DSM 3688 chromosome 1, complete sequence	8e-113	77.04	749	No	9.6388
APC_IM_vircontig_136	20346	Faecalibacterium prausnitzii L2/6 draft genome	0	95.04	3666	No	167.937
APC_IM_vircontig_1360	1577	No hit	No hit	No hit	No hit	No	7.8696
APC_IM_vircontig_1361	1576	Uncultured bacterium clone LM0ABA41ZG05RM1 genomic sequence	0	99.03	721	No	8.13778
APC_IM_vircontig_1362	1575	No hit	No hit	No hit	No hit	No	4.99477
APC_IM_vircontig_1363	1575	No hit	No hit	No hit	No hit	No	16.2496
APC_IM_vircontig_1364	1572	No hit	No hit	No hit	No hit	No	39.994
APC_IM_vircontig_1365	1570	No hit	No hit	No hit	No hit	No	254.59
APC_IM_vircontig_1366	1569	Enterococcus faecalis D32, complete genome	0	92.67	1569	No	6.11825
APC_IM_vircontig_1367	1568	No hit	No hit	No hit	No hit	No	17.9594
APC_IM_vircontig_1368	1568	Bifidobacterium phage Bbif-1, complete sequence	0	99.17	1568	No	22.8658
APC_IM_vircontig_1369	1565	No hit	No hit	No hit	No hit	No	59.8213
APC_IM_vircontig_137	20217	No hit	No hit	No hit	No hit	No	4.94923
APC_IM_vircontig_1370	1564	Candidatus Saccharibacteria oral taxon TM7x, complete genome	5e-75	81.35	370	No	6.5448
APC_IM_vircontig_1371	1562	Unidentified phage clone 2210_scaffold709 genomic sequence	0	99.79	943	No	16.7958
APC_IM_vircontig_1372	1561	Lactococcus phage 936 group phage PhiG, complete genome	0	93.79	1562	No	24.3722
APC_IM_vircontig_1373	1560	No hit	No hit	No hit	No hit	No	6.72412
APC_IM_vircontig_1374	1559	No hit	No hit	No hit	No hit	No	212.156
APC_IM_vircontig_1375	1559	No hit	No hit	No hit	No hit	No	12.4964
APC_IM_vircontig_1376	1557	Bifidobacterium longum subsp. infantis ATCC 15697 = JCM 1222 = DSM 20088 DNA, complete genome	0	98.7	1542	No	6755.05
APC_IM_vircontig_1377	1557	No hit	No hit	No hit	No hit	No	33.7133
APC_IM_vircontig_1378	1555	No hit	No hit	No hit	No hit	No	132.792
APC_IM_vircontig_1379	1555	No hit	No hit	No hit	No hit	No	3.38184
APC_IM_vircontig_138	19954	Bacteroides dorei isolate HS1_L_3_B_079, complete genome	0	96.58	7376	No	14.3694
APC_IM_vircontig_1380	1555	No hit	No hit	No hit	No hit	No	13.4097
APC_IM_vircontig_1381	1554	No hit	No hit	No hit	No hit	No	4.66112
APC_IM_vircontig_1382	1551	Lactococcus phage bIBB29, complete genome	0	91.82	917	No	41.0463
APC_IM_vircontig_1383	1551	No hit	No hit	No hit	No hit	No	103.473
APC_IM_vircontig_1384	1551	Unidentified phage clone 2019_scaffold132 genomic sequence	1e-111	86.18	398	No	218.185
APC_IM_vircontig_1385	1551	Microviridae IME-16, complete sequence	0	84.99	1519	No	4.33127
APC_IM_vircontig_1386	1551	Bacteroides cellulosilyticus strain WH2, complete genome	4e-11	85.19	81	No	8.40971
APC_IM_vircontig_1387	1550	Torque teno mini virus 5 DNA, complete genome, isolate: TGP96	2e-24	82.99	147	No	6.32304
APC_IM_vircontig_1388	1550	No hit	No hit	No hit	No hit	No	231.59
APC_IM_vircontig_1389	1549	No hit	No hit	No hit	No hit	No	14163.5
APC_IM_vircontig_139	19903	Anaerostipes hadrus strain BPB5, complete genome	0	82.63	1641	No	9.39455
APC_IM_vircontig_1390	1547	Lactococcus lactis phage p272, complete genome	0	85.26	1554	No	5.21208
APC_IM_vircontig_1391	1545	No hit	No hit	No hit	No hit	No	159.19
APC_IM_vircontig_1392	1545	No hit	No hit	No hit	No hit	No	6.18678
APC_IM_vircontig_1393	1543	Lactococcus phage R31, complete genome	0	89.73	1548	No	6.01048
APC_IM_vircontig_1394	1540	Lactococcus phage 86501, complete genome	0	85.68	1501	No	4.85054
APC_IM_vircontig_1395	1538	Lactococcus phage 936 group phage Phi109, complete genome	0	94.37	1492	No	9.6355
APC_IM_vircontig_1396	1535	Uncultured organism clone VC1C172TR genomic sequence	3e-67	77.4	469	No	5.65984
APC_IM_vircontig_1397	1534	No hit	No hit	No hit	No hit	No	5.04218
APC_IM_vircontig_1398	1533	Romboutsia ilealis strain CRIB genome assembly, chromosome: chr1	0	85	1320	No	16.3609
APC_IM_vircontig_1399	1533	Lactococcus Phage ASCC191, complete genome	0	90.67	1200	No	13.2674
APC_IM_vircontig_14	61773	Streptococcus mitis B6 complete genome, strain B6	4e-80	95.02	201	No	278.261
APC_IM_vircontig_140	19655	Faecalibacterium prausnitzii L2/6 draft genome	0	78.51	1545	No	12.2666
APC_IM_vircontig_1400	1532	No hit	No hit	No hit	No hit	No	4.90568
APC_IM_vircontig_1401	1531	No hit	No hit	No hit	No hit	No	13.2379
APC_IM_vircontig_1402	1531	Bacillus thuringiensis strain CTC plasmid, complete sequence	0	91.84	1519	No	37.5499
APC_IM_vircontig_1403	1529	No hit	No hit	No hit	No hit	No	124.662
APC_IM_vircontig_1404	1528	No hit	No hit	No hit	No hit	No	13.7635
APC_IM_vircontig_1405	1526	No hit	No hit	No hit	No hit	No	8.30402
APC_IM_vircontig_1406	1522	No hit	No hit	No hit	No hit	No	25.0374
APC_IM_vircontig_1407	1521	Lactococcus phage CB13, complete genome	0	87.63	1528	No	10.401
APC_IM_vircontig_1408	1521	No hit	No hit	No hit	No hit	No	14404.7
APC_IM_vircontig_1409	1520	No hit	No hit	No hit	No hit	No	197.376
APC_IM_vircontig_141	19417	No hit	No hit	No hit	No hit	No	5.52305
APC_IM_vircontig_1410	1520	No hit	No hit	No hit	No hit	No	13.0148
APC_IM_vircontig_1411	1517	Lactococcus lactis phage 645, complete genome	0	95.14	1008	No	5.68289
APC_IM_vircontig_1412	1517	No hit	No hit	No hit	No hit	No	6.58827
APC_IM_vircontig_1413	1509	No hit	No hit	No hit	No hit	No	4.82919
APC_IM_vircontig_1414	1507	Enterobacter cloacae strain R11, complete genome	0	93.28	551	No	6.53726
APC_IM_vircontig_1415	1506	Unidentified phage clone 2210_scaffold709 genomic sequence	0	97.02	1508	No	6.82295
APC_IM_vircontig_1416	1502	No hit	No hit	No hit	No hit	No	47.3926
APC_IM_vircontig_1417	1501	No hit	No hit	No hit	No hit	No	28.4998
APC_IM_vircontig_1418	1499	No hit	No hit	No hit	No hit	No	5.57101
APC_IM_vircontig_1419	1497	No hit	No hit	No hit	No hit	No	5.08792
APC_IM_vircontig_142	19251	Candidatus Saccharibacteria oral taxon TM7x, complete genome	0	80.32	10266	No	6.90592
APC_IM_vircontig_1420	1496	No hit	No hit	No hit	No hit	No	5.74888
APC_IM_vircontig_1421	1492	No hit	No hit	No hit	No hit	No	8.50085
APC_IM_vircontig_1422	1491	No hit	No hit	No hit	No hit	No	8.38152
APC_IM_vircontig_1423	1490	No hit	No hit	No hit	No hit	No	13.5165
APC_IM_vircontig_1424	1489	Leuconostoc phage phiLN12, complete genome	0	98.72	1489	No	541.587
APC_IM_vircontig_1425	1488	No hit	No hit	No hit	No hit	No	4.30961
APC_IM_vircontig_1426	1488	No hit	No hit	No hit	No hit	No	4.11031
APC_IM_vircontig_1427	1487	Uncultured organism clone VC1BY82TF genomic sequence	0	99.28	835	No	5.38594
APC_IM_vircontig_1428	1487	Calypogeia fissa subsp. fissa mitochondrion, complete genome	1e-15	89.47	76	No	4.38314
APC_IM_vircontig_1429	1487	Morganella morganii strain FDAARGOS_365 chromosome, complete genome	0	93.85	1446	No	8.62169
APC_IM_vircontig_143	19230	Flavonifractor plautii strain YL31, complete genome	0	87.2	2351	No	6.60916
APC_IM_vircontig_1430	1481	No hit	No hit	No hit	No hit	No	32.9337
APC_IM_vircontig_1431	1480	No hit	No hit	No hit	No hit	No	46.0547
APC_IM_vircontig_1432	1479	Anaerostipes hadrus strain BPB5, complete genome	7e-93	81.51	449	No	1191.87
APC_IM_vircontig_1433	1478	No hit	No hit	No hit	No hit	No	39.8467
APC_IM_vircontig_1434	1477	No hit	No hit	No hit	No hit	No	5.15141
APC_IM_vircontig_1435	1476	No hit	No hit	No hit	No hit	No	7.18076
APC_IM_vircontig_1436	1475	No hit	No hit	No hit	No hit	No	5.32584
APC_IM_vircontig_1437	1474	No hit	No hit	No hit	No hit	No	841.489
APC_IM_vircontig_1438	1472	Haemophilus influenzae 10810 genome	3e-151	82	650	No	11.626
APC_IM_vircontig_1439	1471	No hit	No hit	No hit	No hit	No	6.8931
APC_IM_vircontig_144	18971	Streptococcus phage IPP23, complete genome	2e-43	76.9	355	No	6.12701
APC_IM_vircontig_1440	1471	Uncultured organism clone VC1DC70TF genomic sequence	2e-153	84.66	567	No	858.198
APC_IM_vircontig_1441	1470	No hit	No hit	No hit	No hit	No	9.13664
APC_IM_vircontig_1442	1469	No hit	No hit	No hit	No hit	No	6.66667
APC_IM_vircontig_1443	1469	No hit	No hit	No hit	No hit	No	7.3091
APC_IM_vircontig_1444	1468	Faecalibacterium prausnitzii L2/6 draft genome	0	86.71	1219	No	5.01061
APC_IM_vircontig_1445	1465	No hit	No hit	No hit	No hit	No	4.93235
APC_IM_vircontig_1446	1465	No hit	No hit	No hit	No hit	No	19.4941
APC_IM_vircontig_1447	1462	Faecalibacterium prausnitzii L2/6 draft genome	0	93.1	1464	No	6.14263
APC_IM_vircontig_1448	1462	Lactococcus phage bIL66M1 E15 (e15) gene, partial cds; and E14 (e14), E13 (e13), E12 (e12), E11 (e11), E10 (e10), E9 (e9), E8 (e8), E7 (e7), E6 (e6), E5 (e5), E4 (e4), E3 (e3), E2 (e2), and E1 (e1) genes, complete cds	0	95.51	579	No	16.4265
APC_IM_vircontig_1449	1462	No hit	No hit	No hit	No hit	No	8.53727
APC_IM_vircontig_145	18875	Akkermansia muciniphila strain YL44 genome	0	88.58	1874	No	5.94093
APC_IM_vircontig_1450	1455	No hit	No hit	No hit	No hit	No	20.1653
APC_IM_vircontig_1451	1452	No hit	No hit	No hit	No hit	No	4.11542
APC_IM_vircontig_1452	1451	Bifidobacterium breve strain NRBB01 chromosome, complete genome	0	96.22	1084	No	2922.26
APC_IM_vircontig_1453	1451	Faecalibacterium prausnitzii L2/6 draft genome	0	95.59	1451	No	18.785
APC_IM_vircontig_1454	1449	No hit	No hit	No hit	No hit	No	49.0083
APC_IM_vircontig_1455	1447	No hit	No hit	No hit	No hit	No	6.53803
APC_IM_vircontig_1456	1444	No hit	No hit	No hit	No hit	No	4.35978
APC_IM_vircontig_1457	1442	No hit	No hit	No hit	No hit	No	6.61584
APC_IM_vircontig_1458	1440	Candidatus Saccharibacteria bacterium GW2011_GWC2_44_17, complete genome	1e-95	82.33	430	No	9.96905
APC_IM_vircontig_1459	1438	No hit	No hit	No hit	No hit	No	5.37863
APC_IM_vircontig_146	18705	Clostridiales sp. SS3/4 draft genome	5e-40	77.99	309	No	16.1534
APC_IM_vircontig_1460	1438	No hit	No hit	No hit	No hit	No	4.83269
APC_IM_vircontig_1461	1437	No hit	No hit	No hit	No hit	No	3.82384
APC_IM_vircontig_1462	1434	No hit	No hit	No hit	No hit	No	4.24765
APC_IM_vircontig_1463	1431	Escherichia coli strain ATCC 43886 chromosome, complete genome	0	96.72	1431	No	610.772
APC_IM_vircontig_1464	1431	Ruminococcus torques L2-14 draft genome	6e-09	95.74	47	No	9.72144
APC_IM_vircontig_1465	1430	No hit	No hit	No hit	No hit	No	4.75843
APC_IM_vircontig_1466	1427	Faecalibacterium prausnitzii L2/6 draft genome	0	90.34	911	No	4.83937
APC_IM_vircontig_1467	1426	No hit	No hit	No hit	No hit	No	2688.02
APC_IM_vircontig_1468	1426	Lactococcus Phage ASCC544, complete genome	0	89.68	1221	No	5.66002
APC_IM_vircontig_1469	1422	Leuconostoc phage phiLNTR3, complete genome	0	99.63	1337	No	3.81814
APC_IM_vircontig_147	18680	No hit	No hit	No hit	No hit	No	8.0733
APC_IM_vircontig_1470	1421	No hit	No hit	No hit	No hit	No	16.5478
APC_IM_vircontig_1471	1420	Winogradskyella sp. PG-2 DNA, complete genome	2e-13	88	75	No	8.49435
APC_IM_vircontig_1472	1420	No hit	No hit	No hit	No hit	No	13.5116
APC_IM_vircontig_1473	1419	No hit	No hit	No hit	No hit	No	11.8632
APC_IM_vircontig_1474	1416	Ruminococcus torques L2-14 draft genome	0	94.47	1284	No	3.93993
APC_IM_vircontig_1475	1416	Faecalibacterium prausnitzii L2/6 draft genome	0	86.72	851	No	5.33276
APC_IM_vircontig_1476	1416	Escherichia coli genome assembly FHI99, scaffold scaffold-28_contig-4.0_1_284808_[organism:Escherichia	0	96.74	1411	No	6.75944
APC_IM_vircontig_1477	1414	No hit	No hit	No hit	No hit	No	4.45214
APC_IM_vircontig_1478	1414	Yeast expression vector pSCUDT2MFE6H, complete sequence	0	97.59	1367	No	8.07412
APC_IM_vircontig_1479	1413	No hit	No hit	No hit	No hit	No	4.25086
APC_IM_vircontig_148	18606	No hit	No hit	No hit	No hit	No	4.75447
APC_IM_vircontig_1480	1412	Bacteroides cellulosilyticus strain WH2, complete genome	1e-125	78.36	730	No	9.831
APC_IM_vircontig_1481	1408	No hit	No hit	No hit	No hit	No	41.1738
APC_IM_vircontig_1482	1407	No hit	No hit	No hit	No hit	No	4.37267
APC_IM_vircontig_1483	1406	No hit	No hit	No hit	No hit	No	18.2792
APC_IM_vircontig_1484	1404	No hit	No hit	No hit	No hit	No	267.432
APC_IM_vircontig_1485	1404	No hit	No hit	No hit	No hit	No	7.02456
APC_IM_vircontig_1486	1403	No hit	No hit	No hit	No hit	No	4.89167
APC_IM_vircontig_1487	1403	No hit	No hit	No hit	No hit	No	5.76098
APC_IM_vircontig_1488	1402	No hit	No hit	No hit	No hit	No	52.5837
APC_IM_vircontig_1489	1401	Lactococcus phage CaseusJM1, complete genome	0	95.57	1401	No	3.73602
APC_IM_vircontig_149	18234	Clostridioides difficile strain 630 delta erm, complete genome	0	94.63	5422	No	12551.5
APC_IM_vircontig_1490	1400	No hit	No hit	No hit	No hit	No	7.98286
APC_IM_vircontig_1491	1400	No hit	No hit	No hit	No hit	No	10.2477
APC_IM_vircontig_1492	1400	Lactococcus phage CaseusJM1, complete genome	0	89.71	1157	No	9.24328
APC_IM_vircontig_1493	1399	Bifidobacterium longum subsp. infantis 157F DNA, complete genome	0	89.36	724	No	3.98722
APC_IM_vircontig_1494	1397	No hit	No hit	No hit	No hit	No	3.56853
APC_IM_vircontig_1495	1394	No hit	No hit	No hit	No hit	No	7.30095
APC_IM_vircontig_1496	1393	Bacteroides dorei CL03T12C01, complete genome	0	99.93	1393	No	5.09194
APC_IM_vircontig_1497	1390	No hit	No hit	No hit	No hit	No	5.4641
APC_IM_vircontig_1498	1387	No hit	No hit	No hit	No hit	No	158.067
APC_IM_vircontig_1499	1387	Bifidobacterium kashiwanohense PV20-2, complete genome	0	78.48	1343	No	5.43431
APC_IM_vircontig_15	61445	Streptococcus mitis B6 complete genome, strain B6	2e-54	85.59	222	No	10.955
APC_IM_vircontig_150	18121	No hit	No hit	No hit	No hit	No	3.23774
APC_IM_vircontig_1500	1386	No hit	No hit	No hit	No hit	No	29.5484
APC_IM_vircontig_1501	1384	No hit	No hit	No hit	No hit	No	9.6001
APC_IM_vircontig_1502	1383	No hit	No hit	No hit	No hit	No	5.99255
APC_IM_vircontig_1503	1382	Lactococcus phage CB14b, complete genome	0	98.17	602	No	735.131
APC_IM_vircontig_1504	1381	No hit	No hit	No hit	No hit	No	5.15511
APC_IM_vircontig_1505	1381	No hit	No hit	No hit	No hit	No	6.40524
APC_IM_vircontig_1506	1381	Lactococcus Phage ASCC191, complete genome	0	96.15	545	No	289.246
APC_IM_vircontig_1507	1381	Enterococcus hirae strain FDAARGOS_234, complete genome	2e-127	84.75	472	No	39.1699
APC_IM_vircontig_1508	1381	No hit	No hit	No hit	No hit	No	6.19764
APC_IM_vircontig_1509	1381	Bacteroides fragilis strain S14, complete genome	0	99.89	920	No	7.09748
APC_IM_vircontig_151	17985	Anaerostipes hadrus strain BPB5, complete genome	0	79.56	1986	No	23.9201
APC_IM_vircontig_1510	1381	Eubacterium sp. Marseille-P3177 strain Marseille-P3177T genome assembly, chromosome: contig00001	0	83.61	1251	No	8.82546
APC_IM_vircontig_1511	1377	Lachnoclostridium sp. YL32, complete genome	0	90.41	1356	No	10.7841
APC_IM_vircontig_1512	1375	No hit	No hit	No hit	No hit	No	3.6283
APC_IM_vircontig_1513	1375	No hit	No hit	No hit	No hit	No	3.41552
APC_IM_vircontig_1514	1374	No hit	No hit	No hit	No hit	No	4.52501
APC_IM_vircontig_1515	1374	Lactococcus phage 936 group phage PhiF.17, complete genome	0	89.59	1230	No	8.9709
APC_IM_vircontig_1516	1374	Gokushovirus WZ-2015a isolate 06Mk06, complete genome	0	87.87	610	No	9.6594
APC_IM_vircontig_1517	1372	No hit	No hit	No hit	No hit	No	5.26374
APC_IM_vircontig_1518	1371	No hit	No hit	No hit	No hit	No	26.2334
APC_IM_vircontig_1519	1371	No hit	No hit	No hit	No hit	No	6.34086
APC_IM_vircontig_152	17746	Veillonella parvula strain UTDB1-3, complete genome	0	88.31	1232	No	7.55211
APC_IM_vircontig_1520	1371	Prevotella fusca JCM 17724 strain W1435 chromosome 1, complete sequence	0	86.77	930	No	9.388
APC_IM_vircontig_1521	1368	No hit	No hit	No hit	No hit	No	6.54308
APC_IM_vircontig_1522	1365	Lactococcus lactis phage P475, complete genome	0	92.41	580	No	10.4455
APC_IM_vircontig_1523	1363	No hit	No hit	No hit	No hit	No	4.10421
APC_IM_vircontig_1524	1361	Lactococcus phage phi7, complete genome	0	92.18	1381	No	6.41793
APC_IM_vircontig_1525	1359	No hit	No hit	No hit	No hit	No	300.328
APC_IM_vircontig_1526	1357	Faecalibacterium prausnitzii SL3/3 draft genome	0	93.74	926	No	6.10368
APC_IM_vircontig_1527	1355	Faecalibacterium prausnitzii L2/6 draft genome	0	95.41	1242	No	3.61029
APC_IM_vircontig_1528	1355	No hit	No hit	No hit	No hit	No	13.561
APC_IM_vircontig_1529	1354	Bacteroides dorei CL03T12C01, complete genome	3e-116	73.6	1182	No	7.3382
APC_IM_vircontig_153	17735	Uncultured bacterium clone Control_TwinB_Time3_CT_5 genomic sequence	0	85.1	2275	No	7.2622
APC_IM_vircontig_1530	1354	Anaerostipes hadrus draft genome	0	98.56	1324	No	33.5778
APC_IM_vircontig_1531	1354	No hit	No hit	No hit	No hit	No	10.8167
APC_IM_vircontig_1532	1353	No hit	No hit	No hit	No hit	No	4.08262
APC_IM_vircontig_1533	1351	No hit	No hit	No hit	No hit	No	15.0799
APC_IM_vircontig_1534	1350	No hit	No hit	No hit	No hit	No	13.6716
APC_IM_vircontig_1535	1348	No hit	No hit	No hit	No hit	No	3.21425
APC_IM_vircontig_1536	1348	No hit	No hit	No hit	No hit	No	4.77319
APC_IM_vircontig_1537	1347	Faecalibacterium prausnitzii SL3/3 draft genome	0	86.87	990	No	3.7764
APC_IM_vircontig_1538	1346	No hit	No hit	No hit	No hit	No	6.48995
APC_IM_vircontig_1539	1346	Lactococcus phage 936 group phage PhiA.16, complete genome	0	95.72	1238	No	10.1275
APC_IM_vircontig_154	17597	Uncultured bacterium clone Control_TwinB_Time3_CT_5 genomic sequence	0	87.28	2272	No	6.65264
APC_IM_vircontig_1540	1346	No hit	No hit	No hit	No hit	No	3.94788
APC_IM_vircontig_1541	1345	No hit	No hit	No hit	No hit	No	7.18574
APC_IM_vircontig_1542	1344	No hit	No hit	No hit	No hit	No	8.36187
APC_IM_vircontig_1543	1342	Rhizobium phaseoli strain N161 plasmid pRphaN161d, complete sequence	3e-21	83.59	128	No	9.78252
APC_IM_vircontig_1544	1339	No hit	No hit	No hit	No hit	No	12.7269
APC_IM_vircontig_1545	1338	No hit	No hit	No hit	No hit	No	5.56729
APC_IM_vircontig_1546	1337	No hit	No hit	No hit	No hit	No	8.03075
APC_IM_vircontig_1547	1337	Tick-associated genomovirus 1 isolate tick24_7, complete genome	3e-12	89.55	67	No	6.58408
APC_IM_vircontig_1548	1336	No hit	No hit	No hit	No hit	No	6.59288
APC_IM_vircontig_1549	1335	Lactococcus phage 936 group phage PhiLj, complete genome	0	97.23	1335	No	327.44
APC_IM_vircontig_155	17508	No hit	No hit	No hit	No hit	No	5.05809
APC_IM_vircontig_1550	1335	No hit	No hit	No hit	No hit	No	1419.66
APC_IM_vircontig_1551	1334	No hit	No hit	No hit	No hit	No	14.7994
APC_IM_vircontig_1552	1334	Torque teno midi virus DNA, complete genome, isolate: MD1-032	1e-124	79.16	734	No	1514.11
APC_IM_vircontig_1553	1333	Faecalibacterium prausnitzii SL3/3 draft genome	0	99.39	820	No	4.02073
APC_IM_vircontig_1554	1331	Candidatus Saccharibacteria oral taxon TM7x, complete genome	0	84.08	1269	No	4.2872
APC_IM_vircontig_1555	1331	Clostridiales sp. SS3/4 draft genome	1e-104	80.19	525	No	15.5734
APC_IM_vircontig_1556	1331	Lactococcus phage P680, complete genome	0	82.02	1240	No	3.31989
APC_IM_vircontig_1557	1331	No hit	No hit	No hit	No hit	No	7.30926
APC_IM_vircontig_1558	1330	No hit	No hit	No hit	No hit	No	7.72984
APC_IM_vircontig_1559	1328	No hit	No hit	No hit	No hit	No	13.5499
APC_IM_vircontig_156	17397	No hit	No hit	No hit	No hit	No	45.1998
APC_IM_vircontig_1560	1326	Parabacteroides distasonis ATCC 8503, complete genome	0	90.42	981	No	9.7673
APC_IM_vircontig_1561	1325	No hit	No hit	No hit	No hit	No	3.56334
APC_IM_vircontig_1562	1325	No hit	No hit	No hit	No hit	No	3.28314
APC_IM_vircontig_1563	1322	No hit	No hit	No hit	No hit	No	5.18302
APC_IM_vircontig_1564	1321	No hit	No hit	No hit	No hit	No	5.02739
APC_IM_vircontig_1565	1321	No hit	No hit	No hit	No hit	No	3.7198
APC_IM_vircontig_1566	1321	No hit	No hit	No hit	No hit	No	7.3452
APC_IM_vircontig_1567	1319	Macrococcus caseolyticus strain IMD0819, complete genome	3e-26	86.78	121	No	4.47281
APC_IM_vircontig_1568	1319	No hit	No hit	No hit	No hit	No	4.41373
APC_IM_vircontig_1569	1319	Torque teno virus isolate P1-2 ORF1 gene, complete cds	5e-89	86.48	318	No	4.73863
APC_IM_vircontig_157	17354	No hit	No hit	No hit	No hit	No	4.18753
APC_IM_vircontig_1570	1316	No hit	No hit	No hit	No hit	No	23.862
APC_IM_vircontig_1571	1316	No hit	No hit	No hit	No hit	No	4.84677
APC_IM_vircontig_1572	1315	Morganella morganii strain FDAARGOS_365 chromosome, complete genome	0	97.78	1263	No	10.6972
APC_IM_vircontig_1573	1315	Faecalibacterium prausnitzii L2/6 draft genome	0	98.1	1315	No	220.299
APC_IM_vircontig_1574	1314	No hit	No hit	No hit	No hit	No	5.23669
APC_IM_vircontig_1575	1313	Bifidobacterium longum strain BXY01, complete genome	0	97.49	1313	No	8.59919
APC_IM_vircontig_1576	1313	Lactococcus Phage ASCC531, complete genome	0	95.31	767	No	4.39547
APC_IM_vircontig_1577	1313	Clostridiales sp. SM4/1 draft genome	6e-14	100	49	No	8.76277
APC_IM_vircontig_1578	1313	No hit	No hit	No hit	No hit	No	159.504
APC_IM_vircontig_1579	1311	Bacteroides fragilis strain S14, complete genome	0	99.9	1010	No	9.76896
APC_IM_vircontig_158	17340	No hit	No hit	No hit	No hit	No	7.61975
APC_IM_vircontig_1580	1310	No hit	No hit	No hit	No hit	No	5.61052
APC_IM_vircontig_1581	1310	No hit	No hit	No hit	No hit	No	4.26459
APC_IM_vircontig_1582	1309	No hit	No hit	No hit	No hit	No	272.341
APC_IM_vircontig_1583	1307	No hit	No hit	No hit	No hit	No	5.99647
APC_IM_vircontig_1584	1307	Prevotella fusca JCM 17724 strain W1435 chromosome 2, complete sequence	6e-123	83.78	481	No	9.5575
APC_IM_vircontig_1585	1305	Klebsiella pneumoniae strain XH209, complete genome	0	94.41	1305	No	12.5186
APC_IM_vircontig_1586	1303	Bacteroides vulgatus ATCC 8482, complete genome	3e-17	100	55	No	12.3916
APC_IM_vircontig_1587	1302	Candidatus Saccharibacteria oral taxon TM7x, complete genome	0	88.65	643	No	9.90705
APC_IM_vircontig_1588	1302	No hit	No hit	No hit	No hit	No	6.01974
APC_IM_vircontig_1589	1302	No hit	No hit	No hit	No hit	No	14.9248
APC_IM_vircontig_159	17285	Ruminococcus torques L2-14 draft genome	2e-13	94.92	59	No	8.60785
APC_IM_vircontig_1590	1301	Clostridiales sp. SM4/1 draft genome	8e-92	83.91	373	No	218.375
APC_IM_vircontig_1591	1301	Collinsella aerofaciens strain indica chromosome, complete genome	3e-11	83.91	87	No	15.5348
APC_IM_vircontig_1592	1300	No hit	No hit	No hit	No hit	No	8.45089
APC_IM_vircontig_1593	1299	No hit	No hit	No hit	No hit	No	4.80743
APC_IM_vircontig_1594	1295	Lactococcus lactis phage 645, complete genome	0	92.59	1309	No	7.88371
APC_IM_vircontig_1595	1295	No hit	No hit	No hit	No hit	No	4.25476
APC_IM_vircontig_1596	1293	No hit	No hit	No hit	No hit	No	10.3663
APC_IM_vircontig_1597	1289	No hit	No hit	No hit	No hit	No	16.302
APC_IM_vircontig_1598	1289	Streptococcus pneumoniae strain NT_110_58, complete genome	2e-148	82.71	613	No	10.8451
APC_IM_vircontig_1599	1288	No hit	No hit	No hit	No hit	No	3.8408
APC_IM_vircontig_16	60322	Bifidobacterium longum subsp. infantis ATCC 15697 = JCM 1222 = DSM 20088 DNA, complete genome	0	97.9	13685	No	7.7228
APC_IM_vircontig_160	17261	[Clostridium] innocuum strain I46 genome	0	75.57	2018	No	7.32032
APC_IM_vircontig_1600	1288	No hit	No hit	No hit	No hit	No	15.6522
APC_IM_vircontig_1601	1286	Bifidobacterium bifidum DNA, complete genome, strain: JCM 7004	0	98.91	1286	No	4.23582
APC_IM_vircontig_1602	1284	No hit	No hit	No hit	No hit	No	7.85878
APC_IM_vircontig_1603	1284	No hit	No hit	No hit	No hit	No	8.6321
APC_IM_vircontig_1604	1281	Bacteriophage N15, complete genome	0	85.01	1261	No	3.44379
APC_IM_vircontig_1605	1281	Bacteroides dorei isolate HS1_L_1_B_010, complete genome	0	99.38	1281	No	32.8112
APC_IM_vircontig_1606	1280	No hit	No hit	No hit	No hit	No	5.14205
APC_IM_vircontig_1607	1279	Faecalibacterium prausnitzii L2/6 draft genome	0	89.78	1282	No	5.0874
APC_IM_vircontig_1608	1278	No hit	No hit	No hit	No hit	No	6.33352
APC_IM_vircontig_1609	1278	No hit	No hit	No hit	No hit	No	398.786
APC_IM_vircontig_161	17162	Uncultured organism clone VC1CI43TR genomic sequence	7e-53	96.35	137	No	7.08106
APC_IM_vircontig_1610	1276	Blautia hansenii DSM 20583, complete genome	0	96.55	1276	No	4.44897
APC_IM_vircontig_1611	1276	Lactococcus phage 936, complete genome	0	96.79	1276	No	4.26892
APC_IM_vircontig_1612	1276	Kangiella profundi strain FT102 chromosome, complete genome	9e-07	83.56	73	No	3.98136
APC_IM_vircontig_1613	1276	Lactococcus phage SL4, complete genome	0	91.95	497	No	7.6434
APC_IM_vircontig_1614	1275	No hit	No hit	No hit	No hit	No	7.26186
APC_IM_vircontig_1615	1273	No hit	No hit	No hit	No hit	No	9.7484
APC_IM_vircontig_1616	1272	Enterobacter asburiae strain ATCC 35953, complete sequence	0	98.02	1262	No	574.446
APC_IM_vircontig_1617	1271	No hit	No hit	No hit	No hit	No	15.9722
APC_IM_vircontig_1618	1271	Candidatus Saccharibacteria oral taxon TM7x, complete genome	0	88.51	1271	No	6.82222
APC_IM_vircontig_1619	1271	No hit	No hit	No hit	No hit	No	5.69766
APC_IM_vircontig_162	17050	Uncultured bacterium clone CX_01B_000_Contig_3 genomic sequence	0	97.67	2570	No	4.42197
APC_IM_vircontig_1620	1270	Candidatus Saccharibacteria oral taxon TM7x, complete genome	7e-172	87.92	530	No	4.85187
APC_IM_vircontig_1621	1270	No hit	No hit	No hit	No hit	No	4.84577
APC_IM_vircontig_1622	1269	Thrips-associated genomovirus 2 isolate thrp_197934, complete genome	1e-10	80.56	108	No	26.0495
APC_IM_vircontig_1623	1268	No hit	No hit	No hit	No hit	No	9.42599
APC_IM_vircontig_1624	1266	No hit	No hit	No hit	No hit	No	17.3785
APC_IM_vircontig_1625	1265	Faecalibacterium prausnitzii L2/6 draft genome	0	95.96	1014	No	10.5586
APC_IM_vircontig_1626	1265	No hit	No hit	No hit	No hit	No	7.19748
APC_IM_vircontig_1627	1265	No hit	No hit	No hit	No hit	No	4.8368
APC_IM_vircontig_1628	1265	No hit	No hit	No hit	No hit	No	5.11466
APC_IM_vircontig_1629	1264	No hit	No hit	No hit	No hit	No	21.0893
APC_IM_vircontig_163	17012	No hit	No hit	No hit	No hit	No	9.78523
APC_IM_vircontig_1630	1264	No hit	No hit	No hit	No hit	No	4.26362
APC_IM_vircontig_1631	1263	No hit	No hit	No hit	No hit	No	18.4709
APC_IM_vircontig_1632	1263	No hit	No hit	No hit	No hit	No	6.75877
APC_IM_vircontig_1633	1262	Uncultured bacterium extrachromosomal DNA RGI02325	0	91.17	532	No	8.2587
APC_IM_vircontig_1634	1262	Lactococcus phage M6654, complete genome	0	96.04	1263	No	4.79343
APC_IM_vircontig_1635	1260	Small anellovirus isolate 2PoSMA ORF2 and ORF1 genes, complete cds	2e-63	98.61	144	No	318.195
APC_IM_vircontig_1636	1259	No hit	No hit	No hit	No hit	No	16.8617
APC_IM_vircontig_1637	1257	No hit	No hit	No hit	No hit	No	4.01394
APC_IM_vircontig_1638	1256	Faecalibacterium prausnitzii strain A2165 chromosome, complete genome	0	99.88	846	No	3.48323
APC_IM_vircontig_1639	1255	No hit	No hit	No hit	No hit	No	258.33
APC_IM_vircontig_164	16998	No hit	No hit	No hit	No hit	No	10.8449
APC_IM_vircontig_1640	1255	No hit	No hit	No hit	No hit	No	1430.37
APC_IM_vircontig_1641	1254	Morganella morganii strain FDAARGOS_172, complete genome	9e-176	94.39	410	No	4.00329
APC_IM_vircontig_1642	1252	Faecalibacterium prausnitzii SL3/3 draft genome	0	99.92	1201	No	1023.58
APC_IM_vircontig_1643	1252	Clostridium saccharolyticum-like K10 draft genome	2e-32	71.19	774	No	5.30774
APC_IM_vircontig_1644	1250	No hit	No hit	No hit	No hit	No	7.15533
APC_IM_vircontig_1645	1249	No hit	No hit	No hit	No hit	No	5.80428
APC_IM_vircontig_1646	1249	No hit	No hit	No hit	No hit	No	3314.94
APC_IM_vircontig_1647	1249	No hit	No hit	No hit	No hit	No	7.13775
APC_IM_vircontig_1648	1249	No hit	No hit	No hit	No hit	No	3.56062
APC_IM_vircontig_1649	1248	Uncultured organism clone VC1CV68TF genomic sequence	0	97.93	676	No	6.8947
APC_IM_vircontig_165	16987	No hit	No hit	No hit	No hit	No	876.044
APC_IM_vircontig_1650	1247	Gokushovirus WZ-2015a isolate 45Mky19, complete genome	3e-126	80.87	596	No	5.28323
APC_IM_vircontig_1651	1246	No hit	No hit	No hit	No hit	No	3.83196
APC_IM_vircontig_1652	1245	No hit	No hit	No hit	No hit	No	11.5592
APC_IM_vircontig_1653	1244	Bacteroides fragilis strain S14, complete genome	0	98.87	799	No	6.9641
APC_IM_vircontig_1654	1244	No hit	No hit	No hit	No hit	No	5.32249
APC_IM_vircontig_1655	1244	Unidentified phage clone 2210_scaffold709 genomic sequence	0	99.2	1244	No	4.26896
APC_IM_vircontig_1656	1243	No hit	No hit	No hit	No hit	No	4.72012
APC_IM_vircontig_1657	1241	No hit	No hit	No hit	No hit	No	7.5773
APC_IM_vircontig_1658	1240	Klebsiella oxytoca DNA, complete genome, strain: JKo3	0	97.9	1240	No	5.44636
APC_IM_vircontig_1659	1240	No hit	No hit	No hit	No hit	No	4.16785
APC_IM_vircontig_166	16776	Bifidobacterium bifidum ATCC 29521 = JCM 1255 = DSM 20456 DNA, complete genome	0	99.38	5787	No	3.46956
APC_IM_vircontig_1660	1238	No hit	No hit	No hit	No hit	No	4.10246
APC_IM_vircontig_1661	1237	Lactococcus phage 936 group phage PhiLj, complete genome	0	93.24	1183	No	9.1982
APC_IM_vircontig_1662	1237	No hit	No hit	No hit	No hit	No	3.70025
APC_IM_vircontig_1663	1237	Anaerostipes hadrus strain BPB5, complete genome	0	88.72	1241	No	6.4936
APC_IM_vircontig_1664	1235	Bifidobacterium longum subsp. infantis ATCC 15697 = JCM 1222 = DSM 20088 DNA, complete genome	0	97.77	583	No	5.22029
APC_IM_vircontig_1665	1235	No hit	No hit	No hit	No hit	No	11.2705
APC_IM_vircontig_1666	1235	Faecalibacterium prausnitzii SL3/3 draft genome	0	99.81	1061	No	7.59714
APC_IM_vircontig_1667	1234	No hit	No hit	No hit	No hit	No	4.82705
APC_IM_vircontig_1668	1234	No hit	No hit	No hit	No hit	No	81.6069
APC_IM_vircontig_1669	1233	No hit	No hit	No hit	No hit	No	11.2326
APC_IM_vircontig_167	16776	Veillonella parvula strain UTDB1-3, complete genome	0	91	2123	No	5.98713
APC_IM_vircontig_1670	1232	No hit	No hit	No hit	No hit	No	5.60678
APC_IM_vircontig_1671	1231	No hit	No hit	No hit	No hit	No	3.71734
APC_IM_vircontig_1672	1230	No hit	No hit	No hit	No hit	No	4.69795
APC_IM_vircontig_1673	1230	Lactococcus Phage ASCC532, complete genome	0	94.16	805	No	10.8986
APC_IM_vircontig_1674	1229	No hit	No hit	No hit	No hit	No	5.36089
APC_IM_vircontig_1675	1227	No hit	No hit	No hit	No hit	No	6.27455
APC_IM_vircontig_1676	1225	No hit	No hit	No hit	No hit	No	1562.09
APC_IM_vircontig_1677	1222	Lachnoclostridium sp. YL32, complete genome	0	81.95	1158	No	5.81372
APC_IM_vircontig_1678	1221	No hit	No hit	No hit	No hit	No	4.73716
APC_IM_vircontig_1679	1218	Bacteroides fragilis 638R genome	0	100	991	No	321.462
APC_IM_vircontig_168	16732	Bifidobacterium longum subsp. longum strain NCIMB8809, complete genome	0	99.81	16732	No	5.03806
APC_IM_vircontig_1680	1218	Bifidobacterium breve strain DRBB28 chromosome, complete genome	0	94.17	1217	No	3.99904
APC_IM_vircontig_1681	1217	No hit	No hit	No hit	No hit	No	6.67761
APC_IM_vircontig_1682	1214	Lactococcus phage jm2, complete genome	0	89.29	1232	No	3.47409
APC_IM_vircontig_1683	1213	No hit	No hit	No hit	No hit	No	40.0588
APC_IM_vircontig_1684	1213	No hit	No hit	No hit	No hit	No	53.7902
APC_IM_vircontig_1685	1212	No hit	No hit	No hit	No hit	No	6.87508
APC_IM_vircontig_1686	1212	No hit	No hit	No hit	No hit	No	4.31175
APC_IM_vircontig_1687	1211	No hit	No hit	No hit	No hit	No	6.65592
APC_IM_vircontig_1688	1211	No hit	No hit	No hit	No hit	No	438.397
APC_IM_vircontig_1689	1211	Lactococcus phage bIL66M1 E15 (e15) gene, partial cds; and E14 (e14), E13 (e13), E12 (e12), E11 (e11), E10 (e10), E9 (e9), E8 (e8), E7 (e7), E6 (e6), E5 (e5), E4 (e4), E3 (e3), E2 (e2), and E1 (e1) genes, complete cds	0	85.22	1211	No	4.99641
APC_IM_vircontig_169	16478	No hit	No hit	No hit	No hit	No	4.06346
APC_IM_vircontig_1690	1210	Escherichia coli strain 144 chromosome, complete genome	0	99.67	1210	No	3.41246
APC_IM_vircontig_1691	1209	Escherichia coli strain 08-00022, complete genome	0	99.66	1170	No	4.37914
APC_IM_vircontig_1692	1208	No hit	No hit	No hit	No hit	No	4.03608
APC_IM_vircontig_1693	1206	No hit	No hit	No hit	No hit	No	2.76312
APC_IM_vircontig_1694	1206	Faecalibacterium prausnitzii L2/6 draft genome	0	96.26	1203	No	17.6776
APC_IM_vircontig_1695	1205	Lactococcus phage 936 group phage Phi10.5, complete genome	0	90.54	920	No	5.61235
APC_IM_vircontig_1696	1205	Faecalibacterium prausnitzii strain A2165 chromosome, complete genome	7e-102	85.52	373	No	6.09677
APC_IM_vircontig_1697	1205	No hit	No hit	No hit	No hit	No	3.24259
APC_IM_vircontig_1698	1203	No hit	No hit	No hit	No hit	No	26.2391
APC_IM_vircontig_1699	1202	No hit	No hit	No hit	No hit	No	10.1399
APC_IM_vircontig_17	59902	Clostridiales sp. SM4/1 draft genome	0	95.94	16261	No	3.87806
APC_IM_vircontig_170	16414	Bacteroides caccae strain ATCC 43185, complete genome	0	89.84	2194	No	668.408
APC_IM_vircontig_1700	1200	No hit	No hit	No hit	No hit	No	81.4335
APC_IM_vircontig_1701	1199	Faecalibacterium prausnitzii strain A2165 chromosome, complete genome	1e-14	100	50	No	3.81161
APC_IM_vircontig_1702	1198	No hit	No hit	No hit	No hit	No	132.45
APC_IM_vircontig_1703	1198	Lactococcus phage 936 group phage PhiF0139, complete genome	1e-178	92.6	446	No	4.58579
APC_IM_vircontig_1704	1198	No hit	No hit	No hit	No hit	No	4.54367
APC_IM_vircontig_1705	1197	Sphinx1.76-related DNA, replication competent episomal DNA MSBI2.176	0	91.54	1206	No	249.902
APC_IM_vircontig_1706	1197	No hit	No hit	No hit	No hit	No	4.2707
APC_IM_vircontig_1707	1195	Bacteroides fragilis 638R genome	0	99.67	1197	No	17.762
APC_IM_vircontig_1708	1194	Uncultured bacterium clone AX128_08E_000_Contig_012 genomic sequence	3e-56	91.18	170	No	195.167
APC_IM_vircontig_1709	1193	No hit	No hit	No hit	No hit	No	32.8468
APC_IM_vircontig_171	16411	Lachnoclostridium sp. YL32, complete genome	1e-10	100	45	No	6.6729
APC_IM_vircontig_1710	1192	Bifidobacterium breve strain DRBB28 chromosome, complete genome	0	100	1192	No	840.605
APC_IM_vircontig_1711	1191	No hit	No hit	No hit	No hit	No	6.99866
APC_IM_vircontig_1712	1191	No hit	No hit	No hit	No hit	No	1815.54
APC_IM_vircontig_1713	1189	Faecalibacterium prausnitzii strain Indica chromosome, complete genome	0	97.14	1189	No	7.9087
APC_IM_vircontig_1714	1188	No hit	No hit	No hit	No hit	No	4.46622
APC_IM_vircontig_1715	1186	Bifidobacterium catenulatum DSM 16992 = JCM 1194 = LMG 11043 DNA, complete genome	0	86.38	1057	No	5.53849
APC_IM_vircontig_1716	1185	No hit	No hit	No hit	No hit	No	5.25979
APC_IM_vircontig_1717	1185	Lactococcus phage 936 group phage Phi5.12, complete genome	0	88.59	1087	No	7.12508
APC_IM_vircontig_1718	1182	Flavonifractor plautii strain YL31, complete genome	0	98.57	420	No	16.4862
APC_IM_vircontig_1719	1182	Bacteroides fragilis genome assembly BFBE1.1, chromosome : scaffold1	0	99.73	1112	No	4.05138
APC_IM_vircontig_172	16367	No hit	No hit	No hit	No hit	No	186.975
APC_IM_vircontig_1720	1182	No hit	No hit	No hit	No hit	No	13.8166
APC_IM_vircontig_1721	1182	Bifidobacterium longum NCC2705, complete genome	0	92.31	1080	No	4.92997
APC_IM_vircontig_1722	1181	Faecalibacterium prausnitzii L2/6 draft genome	8e-42	94.17	120	No	3.16712
APC_IM_vircontig_1723	1181	No hit	No hit	No hit	No hit	No	81.6687
APC_IM_vircontig_1724	1181	Lactococcus Phage ASCC506, complete genome	0	94.37	693	No	3.78746
APC_IM_vircontig_1725	1180	Faecalibacterium prausnitzii L2/6 draft genome	0	88.26	1192	No	12.6747
APC_IM_vircontig_1726	1179	No hit	No hit	No hit	No hit	No	74.0805
APC_IM_vircontig_1727	1177	No hit	No hit	No hit	No hit	No	999.378
APC_IM_vircontig_1728	1177	No hit	No hit	No hit	No hit	No	194.632
APC_IM_vircontig_1729	1175	No hit	No hit	No hit	No hit	No	10.6859
APC_IM_vircontig_173	16348	Bifidobacterium breve strain DRBB30 chromosome, complete genome	2e-28	73.36	428	No	66.9611
APC_IM_vircontig_1730	1175	No hit	No hit	No hit	No hit	No	4.92008
APC_IM_vircontig_1731	1175	No hit	No hit	No hit	No hit	No	41.0985
APC_IM_vircontig_1732	1175	Clostridium saccharobutylicum strain NCP 195, complete genome	1e-59	79.37	349	No	6.61043
APC_IM_vircontig_1733	1173	Lactobacillus phage phiPYB5, complete genome	0	84.54	951	No	4.95642
APC_IM_vircontig_1734	1171	No hit	No hit	No hit	No hit	No	53.3507
APC_IM_vircontig_1735	1169	No hit	No hit	No hit	No hit	No	334.16
APC_IM_vircontig_1736	1168	Candidatus Saccharibacteria bacterium GW2011_GWC2_44_17, complete genome	5e-19	92.31	78	No	54.4679
APC_IM_vircontig_1737	1167	No hit	No hit	No hit	No hit	No	9.5818
APC_IM_vircontig_1738	1166	No hit	No hit	No hit	No hit	No	6.21416
APC_IM_vircontig_1739	1166	Bifidobacterium breve strain NRBB01 chromosome, complete genome	0	93.02	630	No	185.488
APC_IM_vircontig_174	16293	No hit	No hit	No hit	No hit	No	304.565
APC_IM_vircontig_1740	1166	Bacteroides fragilis NCTC 9343, complete genome	0	99.74	1166	No	26.5882
APC_IM_vircontig_1741	1165	No hit	No hit	No hit	No hit	No	4.0465
APC_IM_vircontig_1742	1165	No hit	No hit	No hit	No hit	No	100.559
APC_IM_vircontig_1743	1164	Faecalibacterium prausnitzii L2/6 draft genome	0	93.56	1164	No	4.2147
APC_IM_vircontig_1744	1164	Lactococcus phage 936 group phage PhiE1127, complete genome	0	94.57	626	No	31.448
APC_IM_vircontig_1745	1161	No hit	No hit	No hit	No hit	No	5.1794
APC_IM_vircontig_1746	1161	No hit	No hit	No hit	No hit	No	9.79301
APC_IM_vircontig_1747	1161	No hit	No hit	No hit	No hit	No	3.82004
APC_IM_vircontig_1748	1160	No hit	No hit	No hit	No hit	No	5.16198
APC_IM_vircontig_1749	1160	No hit	No hit	No hit	No hit	No	18.341
APC_IM_vircontig_175	16251	No hit	No hit	No hit	No hit	No	139.425
APC_IM_vircontig_1750	1160	No hit	No hit	No hit	No hit	No	24.5097
APC_IM_vircontig_1751	1159	Torque teno mini virus ALH8, complete genome	0	98.96	1159	No	18.7912
APC_IM_vircontig_1752	1159	Lactococcus phage 936 group phage PhiJF1, complete genome	0	93.75	1056	No	6.5483
APC_IM_vircontig_1753	1159	No hit	No hit	No hit	No hit	No	4.1767
APC_IM_vircontig_1754	1159	Leuconostoc phage phiLN04, complete genome	0	97.75	1156	No	23.6988
APC_IM_vircontig_1755	1159	No hit	No hit	No hit	No hit	No	19.5647
APC_IM_vircontig_1756	1158	Bifidobacterium breve strain NRBB49 chromosome, complete genome	0	99.83	1158	No	67.5648
APC_IM_vircontig_1757	1158	No hit	No hit	No hit	No hit	No	6.13124
APC_IM_vircontig_1758	1157	No hit	No hit	No hit	No hit	No	524.097
APC_IM_vircontig_1759	1157	No hit	No hit	No hit	No hit	No	17.4813
APC_IM_vircontig_176	16178	Clostridioides difficile strain 630 delta erm, complete genome	0	97.25	3599	No	588.482
APC_IM_vircontig_1760	1156	No hit	No hit	No hit	No hit	No	22.5347
APC_IM_vircontig_1761	1156	Unidentified phage clone 2019_scaffold132 genomic sequence	5e-158	81.81	698	No	24.2397
APC_IM_vircontig_1762	1155	No hit	No hit	No hit	No hit	No	4.95969
APC_IM_vircontig_1763	1155	No hit	No hit	No hit	No hit	No	10.7255
APC_IM_vircontig_1764	1155	No hit	No hit	No hit	No hit	No	524.245
APC_IM_vircontig_1765	1154	No hit	No hit	No hit	No hit	No	3.60218
APC_IM_vircontig_1766	1154	No hit	No hit	No hit	No hit	No	163.119
APC_IM_vircontig_1767	1153	Lactococcus phage 936 group phage Phi44, complete genome	0	99.08	541	No	21.7108
APC_IM_vircontig_1768	1152	Leuconostoc phage LDG, complete genome	0	93.06	1152	No	6.80986
APC_IM_vircontig_1769	1152	Gemycircularvirus HV-GcV2, complete genome	3e-101	81.44	485	No	23.1749
APC_IM_vircontig_177	16161	No hit	No hit	No hit	No hit	No	2.64951
APC_IM_vircontig_1770	1152	No hit	No hit	No hit	No hit	No	89.3603
APC_IM_vircontig_1771	1150	Lactococcus phage 936 group phage PhiM1127, complete genome	0	96.61	1150	No	4.9024
APC_IM_vircontig_1772	1147	No hit	No hit	No hit	No hit	No	419.425
APC_IM_vircontig_1773	1147	No hit	No hit	No hit	No hit	No	11.9221
APC_IM_vircontig_1774	1147	No hit	No hit	No hit	No hit	No	203.904
APC_IM_vircontig_1775	1147	Lactococcus phage 936 group phage PhiLj, complete genome	0	98.61	1147	No	3.42847
APC_IM_vircontig_1776	1146	No hit	No hit	No hit	No hit	No	91.5112
APC_IM_vircontig_1777	1146	No hit	No hit	No hit	No hit	No	27.6946
APC_IM_vircontig_1778	1145	Faecalibacterium prausnitzii strain Indica chromosome, complete genome	0	99.77	854	No	337.281
APC_IM_vircontig_1779	1143	No hit	No hit	No hit	No hit	No	167.455
APC_IM_vircontig_178	16065	Clostridium botulinum 202F plasmid pCBI, complete sequence	0	79.41	5681	No	4.05007
APC_IM_vircontig_1780	1142	Faecalibacterium prausnitzii L2/6 draft genome	0	85.38	1149	No	7.0221
APC_IM_vircontig_1781	1140	Bifidobacterium longum subsp. infantis genome assembly Bifidobacterium longum subsp. infantis CECT7210, chromosome : I	0	99.04	1140	No	3.86124
APC_IM_vircontig_1782	1139	No hit	No hit	No hit	No hit	No	11.7469
APC_IM_vircontig_1783	1139	No hit	No hit	No hit	No hit	No	51.6628
APC_IM_vircontig_1784	1138	No hit	No hit	No hit	No hit	No	6.935
APC_IM_vircontig_1785	1137	No hit	No hit	No hit	No hit	No	20.9658
APC_IM_vircontig_1786	1137	Lactococcus phage CB20, complete genome	0	93.27	936	No	17.7233
APC_IM_vircontig_1787	1137	Lactobacillus rhamnosus LOCK908, complete genome	0	98.94	1137	No	142.594
APC_IM_vircontig_1788	1134	No hit	No hit	No hit	No hit	No	36.2076
APC_IM_vircontig_1789	1134	No hit	No hit	No hit	No hit	No	42.1179
APC_IM_vircontig_179	15918	Bifidobacterium breve strain 139W423 chromosome, complete genome	0	98.77	15880	No	4.61811
APC_IM_vircontig_1790	1133	No hit	No hit	No hit	No hit	No	5.24872
APC_IM_vircontig_1791	1132	No hit	No hit	No hit	No hit	No	11.0545
APC_IM_vircontig_1792	1131	Klebsiella oxytoca strain CAV1752, complete genome	0	94.95	653	No	8.78922
APC_IM_vircontig_1793	1131	No hit	No hit	No hit	No hit	No	7.52037
APC_IM_vircontig_1794	1130	Enterococcus faecium strain A_020709_82, complete genome	2e-43	77.18	333	No	189.782
APC_IM_vircontig_1795	1128	No hit	No hit	No hit	No hit	No	3.96502
APC_IM_vircontig_1796	1128	Faecalibacterium prausnitzii SL3/3 draft genome	0	97.04	913	No	8.96794
APC_IM_vircontig_1797	1126	No hit	No hit	No hit	No hit	No	3.39845
APC_IM_vircontig_1798	1126	No hit	No hit	No hit	No hit	No	3.93095
APC_IM_vircontig_1799	1126	No hit	No hit	No hit	No hit	No	6.2901
APC_IM_vircontig_18	59861	No hit	No hit	No hit	No hit	No	3.99778
APC_IM_vircontig_180	15829	No hit	No hit	No hit	No hit	No	33.6868
APC_IM_vircontig_1800	1125	No hit	No hit	No hit	No hit	No	7.0396
APC_IM_vircontig_1801	1124	Candidatus Saccharibacteria oral taxon TM7x, complete genome	0	85.01	707	No	9.16443
APC_IM_vircontig_1802	1122	No hit	No hit	No hit	No hit	No	51.696
APC_IM_vircontig_1803	1122	Leuconostoc phage phiLN03, complete genome	0	94.13	1124	No	5.84575
APC_IM_vircontig_1804	1122	No hit	No hit	No hit	No hit	No	19.4004
APC_IM_vircontig_1805	1122	No hit	No hit	No hit	No hit	No	241.517
APC_IM_vircontig_1806	1121	Lactococcus phage 936 group phage Phi129, complete genome	1e-40	91.54	130	No	823.822
APC_IM_vircontig_1807	1120	No hit	No hit	No hit	No hit	No	5.57885
APC_IM_vircontig_1808	1120	Lactococcus phage 936 group phage Phi.16, complete genome	0	93.65	488	No	4.7301
APC_IM_vircontig_1809	1120	No hit	No hit	No hit	No hit	No	9.7228
APC_IM_vircontig_181	15823	Bifidobacterium breve strain NRBB11 chromosome, complete genome	3e-06	100	37	Yes	12.0565
APC_IM_vircontig_1810	1118	Bacteroides dorei isolate HS1_L_1_B_010, complete genome	0	100	753	No	11.4379
APC_IM_vircontig_1811	1118	No hit	No hit	No hit	No hit	No	7.60053
APC_IM_vircontig_1812	1117	No hit	No hit	No hit	No hit	No	7.7514
APC_IM_vircontig_1813	1117	No hit	No hit	No hit	No hit	No	5.06528
APC_IM_vircontig_1814	1116	No hit	No hit	No hit	No hit	No	4.56112
APC_IM_vircontig_1815	1116	Candidatus Saccharibacteria oral taxon TM7x, complete genome	3e-66	93.79	177	No	57.9769
APC_IM_vircontig_1816	1116	No hit	No hit	No hit	No hit	No	17.2159
APC_IM_vircontig_1817	1115	No hit	No hit	No hit	No hit	No	86.5263
APC_IM_vircontig_1818	1115	Faecalibacterium prausnitzii strain A2165 chromosome, complete genome	5e-158	88.12	480	No	3.13285
APC_IM_vircontig_1819	1114	Prevotella ruminicola 23, complete genome	0	86.23	835	No	6.04648
APC_IM_vircontig_182	15782	No hit	No hit	No hit	No hit	No	4.37552
APC_IM_vircontig_1820	1114	No hit	No hit	No hit	No hit	No	5.53914
APC_IM_vircontig_1821	1114	No hit	No hit	No hit	No hit	No	27.9154
APC_IM_vircontig_1822	1113	No hit	No hit	No hit	No hit	No	70.8466
APC_IM_vircontig_1823	1112	No hit	No hit	No hit	No hit	No	4.15983
APC_IM_vircontig_1824	1111	Bacteroides caccae strain ATCC 43185, complete genome	3e-71	83.72	301	No	51.0303
APC_IM_vircontig_1825	1111	Lactococcus phage 936 group phage PhiS0139, complete genome	0	88.88	1115	No	278.826
APC_IM_vircontig_1826	1111	Eubacterium sp. Marseille-P3177 strain Marseille-P3177T genome assembly, chromosome: contig00001	0	93.15	1109	No	54.2513
APC_IM_vircontig_1827	1109	Escherichia coli genome assembly FHI62, scaffold scaffold-17_contig-6.1_12711_449671_[organism:Escherichia	0	97.21	1003	No	14.167
APC_IM_vircontig_1828	1108	Gokushovirus WZ-2015a isolate 16IC3, complete genome	0	92.34	535	No	43.5572
APC_IM_vircontig_1829	1108	No hit	No hit	No hit	No hit	No	3.2474
APC_IM_vircontig_183	15740	Bifidobacterium breve strain 082W48 chromosome, complete genome	0	99.96	14074	No	281.979
APC_IM_vircontig_1830	1107	Clostridium botulinum 202F, complete genome	6e-147	76.06	1107	No	5.21848
APC_IM_vircontig_1831	1107	No hit	No hit	No hit	No hit	No	5.54979
APC_IM_vircontig_1832	1107	Lachnoclostridium sp. YL32, complete genome	1e-59	91.11	180	No	68.1202
APC_IM_vircontig_1833	1107	No hit	No hit	No hit	No hit	No	50.3952
APC_IM_vircontig_1834	1106	Pseudomonas phage PhiCHU, complete genome	1e-09	91.23	57	No	4.6642
APC_IM_vircontig_1835	1106	Bacteroides fragilis 638R genome	0	99.91	1058	No	5.14938
APC_IM_vircontig_1836	1106	No hit	No hit	No hit	No hit	No	7.12017
APC_IM_vircontig_1837	1106	Bacteroides dorei isolate HS2_L_2_B_045b, complete genome	0	99.74	763	No	5.04807
APC_IM_vircontig_1838	1105	No hit	No hit	No hit	No hit	No	3.35879
APC_IM_vircontig_1839	1105	No hit	No hit	No hit	No hit	No	4.79154
APC_IM_vircontig_184	15719	No hit	No hit	No hit	No hit	No	21.2924
APC_IM_vircontig_1840	1105	No hit	No hit	No hit	No hit	No	4.13199
APC_IM_vircontig_1841	1105	No hit	No hit	No hit	No hit	No	19.3304
APC_IM_vircontig_1842	1104	Ruminococcus torques L2-14 draft genome	0	99.18	1104	No	4.03279
APC_IM_vircontig_1843	1104	No hit	No hit	No hit	No hit	No	3.88779
APC_IM_vircontig_1844	1102	Streptococcus phage IPP30, complete genome	0	83.73	762	No	7.10751
APC_IM_vircontig_1845	1101	Faecalibacterium prausnitzii strain Indica chromosome, complete genome	0	88.09	1108	No	10.5625
APC_IM_vircontig_1846	1101	Bifidobacterium longum subsp. infantis ATCC 15697 = JCM 1222 = DSM 20088 DNA, complete genome	0	92.99	1070	No	14.6516
APC_IM_vircontig_1847	1100	Bacteroides fragilis 638R genome	1e-153	91.58	404	No	6.86207
APC_IM_vircontig_1848	1099	No hit	No hit	No hit	No hit	No	651.068
APC_IM_vircontig_1849	1096	No hit	No hit	No hit	No hit	No	4.1847
APC_IM_vircontig_185	15674	Lactobacillus rhamnosus LOCK908, complete genome	0	100	15641	No	74.6842
APC_IM_vircontig_1850	1096	Lactococcus phage CB13, complete genome	0	95.08	1097	No	5.12191
APC_IM_vircontig_1851	1096	No hit	No hit	No hit	No hit	No	3.41029
APC_IM_vircontig_1852	1095	No hit	No hit	No hit	No hit	No	41.7704
APC_IM_vircontig_1853	1095	No hit	No hit	No hit	No hit	No	3.94558
APC_IM_vircontig_1854	1094	No hit	No hit	No hit	No hit	No	3.6281
APC_IM_vircontig_1855	1094	Faecalibacterium prausnitzii L2/6 draft genome	6e-147	93.17	366	No	3.18014
APC_IM_vircontig_1856	1093	Bacteroides dorei CL03T12C01, complete genome	4e-144	81.71	645	No	43.1607
APC_IM_vircontig_1857	1092	No hit	No hit	No hit	No hit	No	35.0646
APC_IM_vircontig_1858	1091	Bacteroides vulgatus ATCC 8482, complete genome	0	100	620	No	7.5556
APC_IM_vircontig_1859	1090	Saccharomyces cerevisiae YJM270 chromosome XIV sequence	6e-48	78.69	305	No	5.99074
APC_IM_vircontig_186	15669	No hit	No hit	No hit	No hit	No	14.303
APC_IM_vircontig_1860	1090	No hit	No hit	No hit	No hit	No	2.97296
APC_IM_vircontig_1861	1089	No hit	No hit	No hit	No hit	No	7.115
APC_IM_vircontig_1862	1089	No hit	No hit	No hit	No hit	No	3.21836
APC_IM_vircontig_1863	1088	Bacillus jeotgali strain DSM 18226 chromosome	2e-07	100	37	No	5.47181
APC_IM_vircontig_1864	1088	Uncultured organism clone VC1BY82TF genomic sequence	0	99.04	415	No	4.45688
APC_IM_vircontig_1865	1088	Torque teno virus isolate LTT7 ORF1 gene, complete cds	1e-114	79.8	604	No	205.923
APC_IM_vircontig_1866	1087	No hit	No hit	No hit	No hit	No	64.3002
APC_IM_vircontig_1867	1087	No hit	No hit	No hit	No hit	No	5.88026
APC_IM_vircontig_1868	1086	No hit	No hit	No hit	No hit	No	66.4524
APC_IM_vircontig_1869	1086	Bacteriophage Tuc2009, complete genome	1e-119	91.56	320	No	44.1086
APC_IM_vircontig_187	15397	[Eubacterium] rectale ATCC 33656 chromosome, complete genome	5e-19	80.54	149	No	7.54203
APC_IM_vircontig_1870	1084	No hit	No hit	No hit	No hit	No	20.9446
APC_IM_vircontig_1871	1084	Lactococcus phage 936 group phage PhiLj, complete genome	0	96.47	737	No	18.9397
APC_IM_vircontig_1872	1083	Lactococcus phage R31, complete genome	0	86.94	1087	No	505.724
APC_IM_vircontig_1873	1083	No hit	No hit	No hit	No hit	No	23.4497
APC_IM_vircontig_1874	1082	No hit	No hit	No hit	No hit	No	3.29761
APC_IM_vircontig_1875	1081	Faecalibacterium prausnitzii strain Indica chromosome, complete genome	0	98.61	1081	No	15.4139
APC_IM_vircontig_1876	1081	Veillonella rodentium strain NCTC12018 genome assembly, chromosome: 1	0	84.77	1090	No	9.69361
APC_IM_vircontig_1877	1080	No hit	No hit	No hit	No hit	No	4.38026
APC_IM_vircontig_1878	1080	No hit	No hit	No hit	No hit	No	1.99174
APC_IM_vircontig_1879	1080	Uncultured bacterium clone HA0AAA17ZE04RM1 genomic sequence	0	99.05	421	No	7.60604
APC_IM_vircontig_188	15299	Escherichia coli strain C11, complete genome	0	97.02	5778	No	8.76964
APC_IM_vircontig_1880	1080	No hit	No hit	No hit	No hit	No	83.7039
APC_IM_vircontig_1881	1079	No hit	No hit	No hit	No hit	No	6.58606
APC_IM_vircontig_1882	1079	No hit	No hit	No hit	No hit	No	4.25114
APC_IM_vircontig_1883	1078	No hit	No hit	No hit	No hit	No	5.15154
APC_IM_vircontig_1884	1077	No hit	No hit	No hit	No hit	No	6.74906
APC_IM_vircontig_1885	1076	No hit	No hit	No hit	No hit	No	15.3681
APC_IM_vircontig_1886	1075	Pantoea vagans strain ND02, complete genome	2e-48	81.18	255	No	3.49416
APC_IM_vircontig_1887	1074	Lactobacillus oris strain J-1, complete genome	0	86.01	1072	No	133.324
APC_IM_vircontig_1888	1074	Lachnoclostridium phytofermentans ISDg, complete genome	2e-17	90	80	No	3.1437
APC_IM_vircontig_1889	1074	No hit	No hit	No hit	No hit	No	6.9457
APC_IM_vircontig_189	15196	No hit	No hit	No hit	No hit	No	7.8179
APC_IM_vircontig_1890	1074	[Eubacterium] rectale ATCC 33656 chromosome, complete genome	0	96.13	620	No	17.3583
APC_IM_vircontig_1891	1073	No hit	No hit	No hit	No hit	No	10.6947
APC_IM_vircontig_1892	1073	No hit	No hit	No hit	No hit	No	2.76078
APC_IM_vircontig_1893	1071	No hit	No hit	No hit	No hit	No	9.88066
APC_IM_vircontig_1894	1071	Bifidobacterium longum subsp. infantis genome assembly Bifidobacterium longum subsp. infantis CECT7210, chromosome : I	0	89.38	631	No	15.2151
APC_IM_vircontig_1895	1069	Ornithobacterium rhinotracheale ORT-UMN 88, complete genome	0	100	911	No	32.1099
APC_IM_vircontig_1896	1069	No hit	No hit	No hit	No hit	No	3.50234
APC_IM_vircontig_1897	1069	No hit	No hit	No hit	No hit	No	15282.6
APC_IM_vircontig_1898	1069	No hit	No hit	No hit	No hit	No	83.7226
APC_IM_vircontig_1899	1068	Lactococcus phage 936 group phage Phi155, complete genome	0	97	966	No	5.77325
APC_IM_vircontig_19	59722	Streptomyces phage Scap1, complete genome	7e-08	94	50	No	3.76039
APC_IM_vircontig_190	15156	No hit	No hit	No hit	No hit	No	8.04041
APC_IM_vircontig_1900	1068	Lactococcus phage 936 group phage Phi19.2, complete genome	0	95.87	581	No	10.1099
APC_IM_vircontig_1901	1067	No hit	No hit	No hit	No hit	No	2.91332
APC_IM_vircontig_1902	1066	Lactococcus phage 936 group phage PhiL.6, complete genome	0	94.99	999	No	4.68982
APC_IM_vircontig_1903	1065	No hit	No hit	No hit	No hit	No	15.5833
APC_IM_vircontig_1904	1064	Faecalibacterium prausnitzii SL3/3 draft genome	0	97.68	948	No	3.89389
APC_IM_vircontig_1905	1063	No hit	No hit	No hit	No hit	No	11.4668
APC_IM_vircontig_1906	1063	No hit	No hit	No hit	No hit	No	5.35122
APC_IM_vircontig_1907	1063	Candidatus Saccharibacteria oral taxon TM7x, complete genome	0	88.6	833	No	12.2594
APC_IM_vircontig_1908	1063	No hit	No hit	No hit	No hit	No	15.6726
APC_IM_vircontig_1909	1062	Candidatus Saccharibacteria oral taxon TM7x, complete genome	0	83.83	773	No	4.34558
APC_IM_vircontig_191	15123	Clostridium saccharobutylicum strain NCP 258, complete genome	2e-137	80.62	681	No	5.20569
APC_IM_vircontig_1910	1060	No hit	No hit	No hit	No hit	No	673.889
APC_IM_vircontig_1911	1060	Escherichia coli strain 746 chromosome, complete genome	0	99.91	1060	No	3639.29
APC_IM_vircontig_1912	1060	Lactococcus phage CB13, complete genome	0	90.21	572	No	8.0249
APC_IM_vircontig_1913	1060	No hit	No hit	No hit	No hit	No	5.04594
APC_IM_vircontig_1914	1059	No hit	No hit	No hit	No hit	No	10.9987
APC_IM_vircontig_1915	1059	Faecalibacterium prausnitzii strain A2165 chromosome, complete genome	0	99.28	416	No	5.89602
APC_IM_vircontig_1916	1059	Bacteroides vulgatus strain mpk genome	0	100	1059	No	9.64615
APC_IM_vircontig_1917	1059	No hit	No hit	No hit	No hit	No	7.17258
APC_IM_vircontig_1918	1058	No hit	No hit	No hit	No hit	No	3.14216
APC_IM_vircontig_1919	1057	Lactococcus phage 936, complete genome	0	92.1	734	No	4.79067
APC_IM_vircontig_192	15081	Bifidobacterium breve strain NRBB49 chromosome, complete genome	0	99.4	13118	No	8.5376
APC_IM_vircontig_1920	1057	Faecalibacterium prausnitzii L2/6 draft genome	0	99.11	1010	No	4.95534
APC_IM_vircontig_1921	1057	No hit	No hit	No hit	No hit	No	16.3473
APC_IM_vircontig_1922	1056	No hit	No hit	No hit	No hit	No	10.4087
APC_IM_vircontig_1923	1056	Enterococcus rotai strain LMG 26678 genome	2e-07	90.38	52	No	6.5763
APC_IM_vircontig_1924	1055	Lactococcus phage SL4, complete genome	0	83.33	1056	No	4.87926
APC_IM_vircontig_1925	1055	Candidatus Saccharibacteria oral taxon TM7x, complete genome	0	86.86	989	No	3.6373
APC_IM_vircontig_1926	1054	No hit	No hit	No hit	No hit	No	341.928
APC_IM_vircontig_1927	1053	No hit	No hit	No hit	No hit	No	287.7
APC_IM_vircontig_1928	1053	No hit	No hit	No hit	No hit	No	7.71532
APC_IM_vircontig_1929	1053	No hit	No hit	No hit	No hit	No	5.10495
APC_IM_vircontig_193	15039	No hit	No hit	No hit	No hit	No	255.777
APC_IM_vircontig_1930	1053	No hit	No hit	No hit	No hit	No	196.067
APC_IM_vircontig_1931	1053	No hit	No hit	No hit	No hit	No	6.11176
APC_IM_vircontig_1932	1053	Faecalibacterium prausnitzii L2/6 draft genome	0	94.3	1053	No	3.11455
APC_IM_vircontig_1933	1052	Lactococcus phage 936 group phage Phi10.5, complete genome	0	95.6	1046	No	5.39109
APC_IM_vircontig_1934	1052	No hit	No hit	No hit	No hit	No	4.0332
APC_IM_vircontig_1935	1052	Lactococcus phage CaseusJM1, complete genome	0	91.31	978	No	4.6001
APC_IM_vircontig_1936	1051	No hit	No hit	No hit	No hit	No	33.863
APC_IM_vircontig_1937	1050	No hit	No hit	No hit	No hit	No	3.46348
APC_IM_vircontig_1938	1050	No hit	No hit	No hit	No hit	No	4.62695
APC_IM_vircontig_1939	1049	Leuconostoc phage phiLN03, complete genome	0	98	1049	No	3.74412
APC_IM_vircontig_194	14994	Candidatus Saccharibacteria oral taxon TM7x, complete genome	0	79.31	4292	No	9.3363
APC_IM_vircontig_1940	1049	No hit	No hit	No hit	No hit	No	4.50092
APC_IM_vircontig_1941	1049	No hit	No hit	No hit	No hit	No	3.43313
APC_IM_vircontig_1942	1049	No hit	No hit	No hit	No hit	No	10.7766
APC_IM_vircontig_1943	1049	No hit	No hit	No hit	No hit	No	3.28525
APC_IM_vircontig_1944	1048	No hit	No hit	No hit	No hit	No	5.6829
APC_IM_vircontig_1945	1047	No hit	No hit	No hit	No hit	No	3.97905
APC_IM_vircontig_1946	1047	No hit	No hit	No hit	No hit	No	4.17872
APC_IM_vircontig_1947	1047	No hit	No hit	No hit	No hit	No	4.41616
APC_IM_vircontig_1948	1047	Clostridium butyricum strain CDC_51208, complete genome	1e-119	84.93	438	No	8.44455
APC_IM_vircontig_1949	1046	No hit	No hit	No hit	No hit	No	2.65448
APC_IM_vircontig_195	14650	No hit	No hit	No hit	No hit	No	3.40094
APC_IM_vircontig_1950	1046	Prevotella denticola F0289, complete genome	2e-91	74.03	901	No	26.318
APC_IM_vircontig_1951	1046	No hit	No hit	No hit	No hit	No	33.3257
APC_IM_vircontig_1952	1045	Faecalibacterium prausnitzii strain Indica chromosome, complete genome	2e-121	76.43	874	No	13.4339
APC_IM_vircontig_1953	1044	Leuconostoc phage phiLN03, complete genome	0	97.51	1044	No	4.7842
APC_IM_vircontig_1954	1043	Lactococcus lactis phage p2, complete genome	0	94.96	635	No	3.53929
APC_IM_vircontig_1955	1043	No hit	No hit	No hit	No hit	No	3.72385
APC_IM_vircontig_1956	1042	No hit	No hit	No hit	No hit	No	5.06271
APC_IM_vircontig_1957	1042	No hit	No hit	No hit	No hit	No	11.1126
APC_IM_vircontig_1958	1042	Lactobacillus phage PLE3, complete genome	0	100	990	No	2.50308
APC_IM_vircontig_1959	1041	No hit	No hit	No hit	No hit	No	11.1981
APC_IM_vircontig_196	14605	No hit	No hit	No hit	No hit	No	2.3923
APC_IM_vircontig_1960	1041	Lachnoclostridium sp. YL32, complete genome	3e-35	74.74	384	No	8.7658
APC_IM_vircontig_1961	1041	No hit	No hit	No hit	No hit	No	2.21497
APC_IM_vircontig_1962	1040	Lactococcus phage bIBB29, complete genome	0	94.71	1039	No	169.091
APC_IM_vircontig_1963	1039	Bacteroides fragilis genome assembly BFBE1.1, chromosome : scaffold1	0	99.77	860	No	5.35274
APC_IM_vircontig_1964	1037	No hit	No hit	No hit	No hit	No	5.9212
APC_IM_vircontig_1965	1037	No hit	No hit	No hit	No hit	No	2.99376
APC_IM_vircontig_1966	1037	Candidatus Saccharibacteria bacterium GW2011_GWC2_44_17, complete genome	2e-17	100	55	No	12.192
APC_IM_vircontig_1967	1036	Leuconostoc phage phiLN04, complete genome	0	95.75	1035	No	3.77349
APC_IM_vircontig_1968	1036	No hit	No hit	No hit	No hit	No	3.46721
APC_IM_vircontig_1969	1034	Faecalibacterium prausnitzii L2/6 draft genome	0	90.14	1035	No	2.73745
APC_IM_vircontig_197	14554	No hit	No hit	No hit	No hit	No	4.70193
APC_IM_vircontig_1970	1033	Enterococcus faecium strain A_020709_82, complete genome	1e-143	77.43	917	No	3.6536
APC_IM_vircontig_1971	1033	Anaerostipes hadrus draft genome	0	99.52	1033	No	7.2983
APC_IM_vircontig_1972	1032	Clostridiales sp. SS3/4 draft genome	1e-109	75.62	882	No	10.0411
APC_IM_vircontig_1973	1032	No hit	No hit	No hit	No hit	No	7.77125
APC_IM_vircontig_1974	1031	No hit	No hit	No hit	No hit	No	6.55209
APC_IM_vircontig_1975	1031	Bifidobacterium longum subsp. longum GT15, complete genome	0	99.83	602	No	3.82367
APC_IM_vircontig_1976	1030	Bacteroides fragilis genome assembly BFBE1.1, chromosome : scaffold1	0	97.38	1030	No	2.63109
APC_IM_vircontig_1977	1028	Uncultured bacterium clone HA0AAA14ZH04RM1 genomic sequence	0	95.81	525	No	6.7088
APC_IM_vircontig_1978	1028	No hit	No hit	No hit	No hit	No	22.8846
APC_IM_vircontig_1979	1028	No hit	No hit	No hit	No hit	No	3.62359
APC_IM_vircontig_198	14519	[Clostridium] bolteae strain ATCC BAA-613, complete genome	0	79.8	1480	No	4.89025
APC_IM_vircontig_1980	1027	No hit	No hit	No hit	No hit	No	4.86837
APC_IM_vircontig_1981	1027	No hit	No hit	No hit	No hit	No	5.17609
APC_IM_vircontig_1982	1027	No hit	No hit	No hit	No hit	No	3.26726
APC_IM_vircontig_1983	1026	No hit	No hit	No hit	No hit	No	3.04835
APC_IM_vircontig_1984	1024	No hit	No hit	No hit	No hit	No	2.19398
APC_IM_vircontig_1985	1024	No hit	No hit	No hit	No hit	No	158.891
APC_IM_vircontig_1986	1023	No hit	No hit	No hit	No hit	No	91.8184
APC_IM_vircontig_1987	1023	Bifidobacterium breve strain NRBB01 chromosome, complete genome	0	99.08	437	No	35.1041
APC_IM_vircontig_1988	1022	Escherichia coli genome assembly FHI42, scaffold scaffold-19	0	98.93	1024	No	9.5301
APC_IM_vircontig_1989	1022	No hit	No hit	No hit	No hit	No	40.1
APC_IM_vircontig_199	14486	Candidatus Saccharibacteria oral taxon TM7x, complete genome	0	77.52	4244	No	4.55284
APC_IM_vircontig_1990	1022	Roseburia hominis A2-183, complete genome	0	96.97	957	No	32.106
APC_IM_vircontig_1991	1022	No hit	No hit	No hit	No hit	No	2.8054
APC_IM_vircontig_1992	1021	No hit	No hit	No hit	No hit	No	3.46794
APC_IM_vircontig_1993	1021	No hit	No hit	No hit	No hit	No	6.6136
APC_IM_vircontig_1994	1020	No hit	No hit	No hit	No hit	No	8.1091
APC_IM_vircontig_1995	1020	No hit	No hit	No hit	No hit	No	63.5721
APC_IM_vircontig_1996	1019	Leuconostoc phage P793, complete genome	0	94.09	1016	No	7.5489
APC_IM_vircontig_1997	1019	No hit	No hit	No hit	No hit	No	3.97676
APC_IM_vircontig_1998	1018	Faecalibacterium prausnitzii L2/6 draft genome	0	95.27	1015	No	4.8069
APC_IM_vircontig_1999	1017	Escherichia coli genome assembly FHI42, scaffold scaffold-8	0	99.9	1017	No	14.1025
APC_IM_vircontig_2	103073	Bacillus virus PBS1, complete genome	3e-19	89.13	92	No	4.1485
APC_IM_vircontig_20	59499	Candidatus Saccharibacteria oral taxon TM7x, complete genome	0	81.57	7671	No	8.108
APC_IM_vircontig_200	14434	Bifidobacterium longum DNA, complete genome, strain: 105-A	0	92.59	6559	No	5.23909
APC_IM_vircontig_2000	1016	No hit	No hit	No hit	No hit	No	3.93906
APC_IM_vircontig_2001	1016	Bifidobacterium longum subsp. infantis 157F DNA, complete genome	0	89.35	601	No	4.45579
APC_IM_vircontig_2002	1015	No hit	No hit	No hit	No hit	No	7.1103
APC_IM_vircontig_2003	1015	No hit	No hit	No hit	No hit	No	13.588
APC_IM_vircontig_2004	1015	Lactobacillus rhamnosus LOCK908, complete genome	0	100	1015	No	13.4742
APC_IM_vircontig_2005	1014	No hit	No hit	No hit	No hit	No	3.95255
APC_IM_vircontig_2006	1014	No hit	No hit	No hit	No hit	No	2.49872
APC_IM_vircontig_2007	1014	No hit	No hit	No hit	No hit	No	6.20757
APC_IM_vircontig_2008	1011	Torque teno mini virus 3 DNA, complete genome, isolate: TLMV-NLC026	5e-63	82.14	308	No	7.8064
APC_IM_vircontig_2009	1011	No hit	No hit	No hit	No hit	No	3.08551
APC_IM_vircontig_201	14404	Candidatus Saccharibacteria oral taxon TM7x, complete genome	0	78.82	8119	No	2.64414
APC_IM_vircontig_2010	1010	No hit	No hit	No hit	No hit	No	4.20658
APC_IM_vircontig_2011	1010	No hit	No hit	No hit	No hit	No	3.61812
APC_IM_vircontig_2012	1009	No hit	No hit	No hit	No hit	No	2.65551
APC_IM_vircontig_2013	1008	No hit	No hit	No hit	No hit	No	5.8653
APC_IM_vircontig_2014	1008	Bacteriophage phi LC3, complete genome	0	88.73	923	No	18.7584
APC_IM_vircontig_2015	1007	No hit	No hit	No hit	No hit	No	3.89778
APC_IM_vircontig_2016	1007	No hit	No hit	No hit	No hit	No	3.29685
APC_IM_vircontig_2017	1006	No hit	No hit	No hit	No hit	No	3.20114
APC_IM_vircontig_2018	1006	No hit	No hit	No hit	No hit	No	3.51504
APC_IM_vircontig_2019	1005	Enterococcus faecium strain ISMMS_VRE_3 genome	4e-59	97.84	139	No	2.959
APC_IM_vircontig_202	14332	No hit	No hit	No hit	No hit	No	8.47141
APC_IM_vircontig_2020	1005	No hit	No hit	No hit	No hit	No	9.393
APC_IM_vircontig_2021	1005	Candidatus Saccharibacteria bacterium GW2011_GWC2_44_17, complete genome	2e-157	79.57	798	No	2.58771
APC_IM_vircontig_2022	1004	No hit	No hit	No hit	No hit	No	128.807
APC_IM_vircontig_2023	1003	No hit	No hit	No hit	No hit	No	3.65954
APC_IM_vircontig_2024	1001	Bacteroides fragilis strain S14, complete genome	0	99.7	1001	No	2.93379
APC_IM_vircontig_2025	1001	Enterococcus faecium isolate Ef_aus00233 genome assembly, chromosome: 1	0	86.39	999	No	4.17162
APC_IM_vircontig_2026	1000	Faecalibacterium prausnitzii L2/6 draft genome	0	93.2	1000	No	59.3967
APC_IM_vircontig_2027	1000	Microviridae IME-16, complete sequence	0	91.21	1001	No	2.847
APC_IM_vircontig_2028	1000	Prevotella intermedia strain KCOM 2836 chromosome, complete genome	1e-93	77.45	612	No	7.1639
APC_IM_vircontig_203	14315	No hit	No hit	No hit	No hit	No	4.74581
APC_IM_vircontig_204	14307	No hit	No hit	No hit	No hit	No	3.50813
APC_IM_vircontig_205	14260	Enterococcus phage phiFL4A, complete genome	0	90.19	6670	No	2.78046
APC_IM_vircontig_206	14204	Escherichia coli O157 typing phage 10, complete genome	0	96.28	7635	No	2.96269
APC_IM_vircontig_207	14022	Lachnoclostridium sp. YL32, complete genome	1e-14	98.18	55	No	5.16368
APC_IM_vircontig_208	13950	No hit	No hit	No hit	No hit	No	35.3028
APC_IM_vircontig_209	13926	No hit	No hit	No hit	No hit	No	5.44971
APC_IM_vircontig_21	59271	Faecalibacterium prausnitzii strain Indica chromosome, complete genome	5e-144	87.13	474	No	7.60801
APC_IM_vircontig_210	13682	Candidatus Saccharibacteria oral taxon TM7x, complete genome	0	81.43	4630	No	5.43648
APC_IM_vircontig_211	13621	Enterococcus faecium strain A_020709_82, complete genome	0	94.95	6157	No	5.52268
APC_IM_vircontig_212	13610	No hit	No hit	No hit	No hit	No	5.08663
APC_IM_vircontig_213	13461	No hit	No hit	No hit	No hit	No	3.56207
APC_IM_vircontig_214	13450	No hit	No hit	No hit	No hit	No	6.1027
APC_IM_vircontig_215	13279	Enterococcus faecalis strain KB1 genome	0	79.12	1676	No	13.5162
APC_IM_vircontig_216	13124	Enterococcus faecalis str. Symbioflor 1, complete genome	0	99.64	9754	No	3.39683
APC_IM_vircontig_217	13098	No hit	No hit	No hit	No hit	No	4.52941
APC_IM_vircontig_218	13075	No hit	No hit	No hit	No hit	No	3.20509
APC_IM_vircontig_219	13046	Veillonella parvula strain UTDB1-3, complete genome	0	90.3	3042	No	7.10834
APC_IM_vircontig_22	59249	Oscillibacter valericigenes Sjm18-20 DNA, complete genome	9e-12	88.89	72	No	6.01863
APC_IM_vircontig_220	13006	No hit	No hit	No hit	No hit	No	3.89516
APC_IM_vircontig_221	12984	Enterococcus faecalis ATCC 29212, complete genome	0	99.84	5579	No	2.63346
APC_IM_vircontig_222	12958	Bifidobacterium longum subsp. infantis 157F DNA, complete genome	0	99.27	1507	No	27.3803
APC_IM_vircontig_223	12913	No hit	No hit	No hit	No hit	No	5.01495
APC_IM_vircontig_224	12883	Lachnoclostridium sp. YL32, complete genome	3e-26	73.07	453	No	4.8445
APC_IM_vircontig_225	12856	No hit	No hit	No hit	No hit	No	13.0396
APC_IM_vircontig_226	12756	No hit	No hit	No hit	No hit	No	4.39109
APC_IM_vircontig_227	12679	Flavonifractor plautii strain YL31, complete genome	8e-101	94.72	246	No	3.01396
APC_IM_vircontig_228	12659	Clostridium saccharobutylicum strain NCP 195, complete genome	5e-28	95.51	89	No	7.4697
APC_IM_vircontig_229	12564	Pragia fontium strain 24613, complete genome	5e-58	91.43	175	No	37.9444
APC_IM_vircontig_23	59203	Bacteroides dorei isolate HS2_L_2_B_045b, complete genome	0	79.04	2099	Yes	8.51782
APC_IM_vircontig_230	12534	No hit	No hit	No hit	No hit	No	5.35482
APC_IM_vircontig_231	12410	Bacillus oceanisediminis 2691, complete genome	1e-109	72.75	1336	No	2.98861
APC_IM_vircontig_232	12384	No hit	No hit	No hit	No hit	No	3.8251
APC_IM_vircontig_233	12348	No hit	No hit	No hit	No hit	No	3.5125
APC_IM_vircontig_234	12338	No hit	No hit	No hit	No hit	No	3.49809
APC_IM_vircontig_235	12336	Unidentified phage clone 2203_scaffold802 genomic sequence	4e-29	70.57	897	No	2.79891
APC_IM_vircontig_236	12146	No hit	No hit	No hit	No hit	No	3.25463
APC_IM_vircontig_237	12034	PREDICTED: Papilio xuthus non-classical arabinogalactan protein 31-like (LOC106115470), mRNA	9e-06	97.5	40	No	2.68504
APC_IM_vircontig_238	11949	No hit	No hit	No hit	No hit	No	1685.7
APC_IM_vircontig_239	11638	Uncultured bacterium clone LM0ACA11ZG08RM1 genomic sequence	0	99.26	544	No	3.72529
APC_IM_vircontig_24	58419	Saccharomyces cerevisiae YJM683 chromosome XV sequence	9e-07	100	39	No	8.7532
APC_IM_vircontig_240	11602	No hit	No hit	No hit	No hit	No	135.16
APC_IM_vircontig_241	11573	Ruminococcus albus 7, complete genome	3e-15	78.21	156	No	2.16813
APC_IM_vircontig_242	11566	No hit	No hit	No hit	No hit	No	3.82621
APC_IM_vircontig_243	11347	Roseburia intestinalis M50/1 draft genome	3e-15	87.36	87	No	4.72353
APC_IM_vircontig_244	11229	No hit	No hit	No hit	No hit	No	2094.39
APC_IM_vircontig_245	11131	Enterococcus thailandicus strain a523 chromosome, complete genome	0	77.58	5071	No	13.2169
APC_IM_vircontig_246	11104	No hit	No hit	No hit	No hit	No	3.23723
APC_IM_vircontig_247	11025	Faecalibacterium prausnitzii L2/6 draft genome	0	93.92	2255	No	2.39176
APC_IM_vircontig_248	11014	Blautia hansenii DSM 20583, complete genome	3e-84	77.44	563	No	5.7173
APC_IM_vircontig_249	11001	Bifidobacterium longum subsp. infantis ATCC 15697 = JCM 1222 = DSM 20088 DNA, complete genome	0	97.68	8225	No	10.6227
APC_IM_vircontig_25	58179	Roseburia intestinalis XB6B4 draft genome	0	86.35	4117	Yes	3.77508
APC_IM_vircontig_250	10975	No hit	No hit	No hit	No hit	No	25.8299
APC_IM_vircontig_251	10973	No hit	No hit	No hit	No hit	No	3.62176
APC_IM_vircontig_252	10969	No hit	No hit	No hit	No hit	No	17.3099
APC_IM_vircontig_253	10926	Bifidobacterium longum subsp. longum strain AH1206, complete genome	0	99.52	4623	No	7.21946
APC_IM_vircontig_254	10883	Escherichia coli strain ZH063, complete genome	0	96.97	9320	No	3.13267
APC_IM_vircontig_255	10710	Candidatus Saccharibacteria oral taxon TM7x, complete genome	0	79.43	6763	No	51.1729
APC_IM_vircontig_256	10618	Escherichia coli strain GB089, complete genome	0	97.22	9923	No	4.32999
APC_IM_vircontig_257	10615	No hit	No hit	No hit	No hit	No	602.973
APC_IM_vircontig_258	10613	Flavonifractor plautii strain YL31, complete genome	1e-128	90.56	360	No	6.3416
APC_IM_vircontig_259	10571	IAS virus, complete genome	4e-14	88.46	78	No	3.57383
APC_IM_vircontig_26	58092	Bacteroides dorei CL03T12C01, complete genome	4e-50	91.72	157	No	4.34323
APC_IM_vircontig_260	10517	No hit	No hit	No hit	No hit	No	5.8083
APC_IM_vircontig_261	10467	Bifidobacterium longum subsp. longum strain NCIMB8809, complete genome	0	99.06	5872	No	3.3309
APC_IM_vircontig_262	10449	No hit	No hit	No hit	No hit	No	3.34475
APC_IM_vircontig_263	10424	Erythrobacter sp. HL-111 genome assembly, chromosome: I	2e-16	91.89	74	No	15.0281
APC_IM_vircontig_264	10405	Bifidobacterium longum subsp. longum JCM 1217 DNA, complete genome	0	92.28	1788	No	5.0559
APC_IM_vircontig_265	10327	Enterococcus faecalis strain L12, complete genome	0	78.5	2488	No	3.95362
APC_IM_vircontig_266	10322	Candidatus Saccharibacteria oral taxon TM7x, complete genome	0	88.27	4245	No	3.95642
APC_IM_vircontig_267	10254	Candidatus Saccharibacteria oral taxon TM7x, complete genome	1e-23	97.3	74	No	7.6241
APC_IM_vircontig_268	10216	No hit	No hit	No hit	No hit	No	3.53379
APC_IM_vircontig_269	10163	Anaerostipes hadrus strain BPB5, complete genome	0	97.65	3911	No	6.4711
APC_IM_vircontig_27	56261	No hit	No hit	No hit	No hit	No	19.405
APC_IM_vircontig_270	10060	Clostridium botulinum 202F, complete genome	2e-171	72.02	2366	No	6.9912
APC_IM_vircontig_271	10006	Ruminococcus torques L2-14 draft genome	0	89.25	1246	No	4.59213
APC_IM_vircontig_272	9999	Clostridiales sp. SS3/4 draft genome	5e-152	99.67	302	No	2.90416
APC_IM_vircontig_273	9976	Uncultured bacterium clone Control_TwinB_Time3_CY_15 genomic sequence	7e-21	92.68	82	No	3.9651
APC_IM_vircontig_274	9963	No hit	No hit	No hit	No hit	No	4.13295
APC_IM_vircontig_275	9935	No hit	No hit	No hit	No hit	No	2.77555
APC_IM_vircontig_276	9900	No hit	No hit	No hit	No hit	No	59.0473
APC_IM_vircontig_277	9834	Streptococcus phage IPP36, complete genome	7e-26	83.8	142	No	9.73041
APC_IM_vircontig_278	9762	Roseburia hominis A2-183, complete genome	0	99.69	3211	No	3.10317
APC_IM_vircontig_279	9725	[Clostridium] bolteae strain ATCC BAA-613, complete genome	0	90.83	1582	No	5.0397
APC_IM_vircontig_28	54318	No hit	No hit	No hit	No hit	No	6.7398
APC_IM_vircontig_280	9649	Bifidobacterium adolescentis strain BBMN23, complete genome	0	98.17	9646	No	140.416
APC_IM_vircontig_281	9583	Veillonella parvula strain UTDB1-3, complete genome	5e-07	97.56	41	No	4.88973
APC_IM_vircontig_282	9503	Faecalibacterium prausnitzii SL3/3 draft genome	3e-34	88.72	133	No	4.03426
APC_IM_vircontig_283	9476	Bifidobacterium longum subsp. longum strain AH1206, complete genome	0	97.67	2227	No	3.46458
APC_IM_vircontig_284	9446	Parabacteroides distasonis ATCC 8503, complete genome	0	78.84	1810	No	2.08314
APC_IM_vircontig_285	9405	Lactococcus phage 936 group phage PhiB1127, complete genome	0	90.72	3716	No	3.25247
APC_IM_vircontig_286	9396	Bifidobacterium longum subsp. longum strain AH1206, complete genome	0	98.54	3424	No	4.52331
APC_IM_vircontig_287	9384	No hit	No hit	No hit	No hit	No	6.0328
APC_IM_vircontig_288	9355	Unidentified phage clone 2020_scaffold1264 genomic sequence	0	99.42	6413	No	3.10456
APC_IM_vircontig_289	9342	No hit	No hit	No hit	No hit	No	3.89947
APC_IM_vircontig_29	53394	No hit	No hit	No hit	No hit	No	98.4708
APC_IM_vircontig_290	9337	Clostridiales sp. SS3/4 draft genome	6e-41	78.88	303	No	28.9649
APC_IM_vircontig_291	9328	Bifidobacterium breve strain 082W48 chromosome, complete genome	0	99.61	9274	No	3.0924
APC_IM_vircontig_292	9317	Lactococcus phage 936 group phage PhiJF1, complete genome	0	91	2734	No	2.78521
APC_IM_vircontig_293	9296	Flavonifractor plautii strain YL31, complete genome	0	88.44	2361	No	3.2707
APC_IM_vircontig_294	9257	Prevotella ruminicola 23, complete genome	0	81.86	2718	No	4.31786
APC_IM_vircontig_295	9230	Clostridiales sp. SS3/4 draft genome	5e-12	87.18	78	No	3.42949
APC_IM_vircontig_296	9198	Uncultured bacterium clone LM0ACA17ZA03RM1 genomic sequence	0	96.11	643	No	4.6186
APC_IM_vircontig_297	9183	Bifidobacterium longum subsp. longum F8 draft genome	0	99.92	9094	No	178.676
APC_IM_vircontig_298	9145	Clostridium botulinum A3 str. Loch Maree, complete genome	1e-18	82.54	126	No	12.0925
APC_IM_vircontig_299	9128	No hit	No hit	No hit	No hit	No	15.0832
APC_IM_vircontig_3	102423	Uncultured bacterium clone LM0ABA27ZC12FM1 genomic sequence	0	93.98	747	No	3.16873
APC_IM_vircontig_30	53083	Roseburia intestinalis XB6B4 draft genome	0	88.34	4107	No	6.40638
APC_IM_vircontig_300	9090	No hit	No hit	No hit	No hit	No	3.49232
APC_IM_vircontig_301	9067	Uncultured organism clone VC1DA17TF genomic sequence	0	86.4	772	No	5.64163
APC_IM_vircontig_302	8988	Faecalibacterium prausnitzii SL3/3 draft genome	0	93.41	4311	No	10.7976
APC_IM_vircontig_303	8932	Lachnoclostridium sp. YL32, complete genome	0	88.04	2760	No	3.26659
APC_IM_vircontig_304	8928	No hit	No hit	No hit	No hit	No	3.9881
APC_IM_vircontig_305	8919	Clostridium botulinum 202F, complete genome	5e-62	77.86	420	No	2.19048
APC_IM_vircontig_306	8886	Enterobacter cloacae strain AR_0050, complete genome	0	97.27	2971	No	3.89571
APC_IM_vircontig_307	8853	Anaerostipes hadrus draft genome	0	91.98	3218	No	3.76386
APC_IM_vircontig_308	8807	Escherichia coli genome assembly FHI8, scaffold scaffold-25_contig-7.0_1_297482_[organism:Escherichia	0	96.84	4556	No	16.8124
APC_IM_vircontig_309	8791	Candidatus Saccharibacteria oral taxon TM7x, complete genome	0	80.44	6318	No	4.6002
APC_IM_vircontig_31	50104	No hit	No hit	No hit	No hit	Yes	5.73445
APC_IM_vircontig_310	8753	Pasteurella multocida strain Pm-3, complete genome	1e-37	69.66	1315	No	2.04725
APC_IM_vircontig_311	8752	No hit	No hit	No hit	No hit	No	2.94913
APC_IM_vircontig_312	8741	Bacteriophage c2 complete genome	0	94	5001	No	33.3701
APC_IM_vircontig_313	8741	No hit	No hit	No hit	No hit	No	27.4408
APC_IM_vircontig_314	8691	Uncultured prokaryote from Rat gut metagenome metamobilome, isolate RGFK0809	0	82.34	1489	No	8.1885
APC_IM_vircontig_315	8642	No hit	No hit	No hit	No hit	No	7.0725
APC_IM_vircontig_316	8624	Parabacteroides distasonis ATCC 8503, complete genome	0	95.53	5055	No	7.2307
APC_IM_vircontig_317	8618	Lactococcus phage SL4, complete genome	0	83.36	5972	No	17.6465
APC_IM_vircontig_318	8586	Escherichia coli UMNK88, complete genome	0	99.84	7563	No	3372.89
APC_IM_vircontig_319	8564	Candidatus Sulcia muelleri strain ENCA chromosome, complete genome	2e-06	87.93	58	No	9.8301
APC_IM_vircontig_32	49039	Escherichia coli strain CREC-544 plasmid pCREC-544_3, complete sequence	0	99.5	20049	No	2.66326
APC_IM_vircontig_320	8493	No hit	No hit	No hit	No hit	No	3.71988
APC_IM_vircontig_321	8474	Uncultured marine virus isolate Anoxic2_4 genomic sequence	1e-07	92.16	51	No	3.33072
APC_IM_vircontig_322	8403	No hit	No hit	No hit	No hit	No	1.71877
APC_IM_vircontig_323	8374	No hit	No hit	No hit	No hit	No	76.968
APC_IM_vircontig_324	8367	Faecalibacterium prausnitzii SL3/3 draft genome	0	81.38	3131	No	2.5971
APC_IM_vircontig_325	8346	No hit	No hit	No hit	No hit	No	3.57723
APC_IM_vircontig_326	8272	Uncultured organism clone VC1AK79TF genomic sequence	1e-176	82.69	722	No	6.1273
APC_IM_vircontig_327	8249	Flavonifractor plautii strain YL31, complete genome	0	99.06	2019	No	8.86226
APC_IM_vircontig_328	8214	No hit	No hit	No hit	No hit	No	6.27019
APC_IM_vircontig_329	8176	Bacteroides dorei isolate HS2_L_2_B_045b, complete genome	0	87.68	1112	No	11.5212
APC_IM_vircontig_33	48106	Rhodococcus phage ReqiPepy6, complete genome	2e-58	73.03	760	No	3.80317
APC_IM_vircontig_330	8168	No hit	No hit	No hit	No hit	No	6.81696
APC_IM_vircontig_331	8153	No hit	No hit	No hit	No hit	No	5.96455
APC_IM_vircontig_332	8055	Anaerostipes hadrus strain BPB5, complete genome	0	99.78	8055	No	5.07768
APC_IM_vircontig_333	7974	No hit	No hit	No hit	No hit	No	1.90826
APC_IM_vircontig_334	7924	No hit	No hit	No hit	No hit	No	4.09731
APC_IM_vircontig_335	7904	No hit	No hit	No hit	No hit	No	2.5459
APC_IM_vircontig_336	7901	Faecalibacterium prausnitzii SL3/3 draft genome	0	94.31	1301	No	2.59706
APC_IM_vircontig_337	7878	Actinomyces sp. Marseille-P2985 strain Marseille-P2985T genome assembly, chromosome: contig00001	1e-12	88.16	76	No	5.051
APC_IM_vircontig_338	7836	Uncultured bacterium clone TE_060301_060302_Contig_6 genomic sequence	0	95.57	654	No	3.73742
APC_IM_vircontig_339	7808	Morganella morganii strain FDAARGOS_365 chromosome, complete genome	0	94.72	1952	No	4.01663
APC_IM_vircontig_34	47293	Uncultured prokaryote from Rat gut metagenome metamobilome, isolate RGFK0809	0	82.34	1489	No	3.93596
APC_IM_vircontig_340	7794	No hit	No hit	No hit	No hit	No	3.9008
APC_IM_vircontig_341	7777	[Eubacterium] hallii isolate EH1 genome assembly, chromosome: I	0	98.95	4109	No	5.48548
APC_IM_vircontig_342	7770	Veillonella parvula strain UTDB1-3, complete genome	0	90.43	690	No	12.8331
APC_IM_vircontig_343	7719	No hit	No hit	No hit	No hit	No	3.35334
APC_IM_vircontig_344	7688	Lactococcus phage 936, complete genome	0	88.37	3681	No	2.42017
APC_IM_vircontig_345	7654	Bifidobacterium breve strain 082W48 chromosome, complete genome	0	99.63	7066	No	3.80583
APC_IM_vircontig_346	7646	No hit	No hit	No hit	No hit	No	4.58235
APC_IM_vircontig_347	7634	No hit	No hit	No hit	No hit	No	7.9718
APC_IM_vircontig_348	7629	No hit	No hit	No hit	No hit	No	8.2882
APC_IM_vircontig_349	7620	Unidentified phage clone 2210_scaffold709 genomic sequence	0	98.46	7605	No	3.71357
APC_IM_vircontig_35	46479	No hit	No hit	No hit	No hit	No	5.7054
APC_IM_vircontig_350	7573	Akkermansia muciniphila strain YL44 genome	1e-127	86.62	426	No	2.35144
APC_IM_vircontig_351	7571	Faecalibacterium prausnitzii L2/6 draft genome	5e-11	83.87	93	No	95.2309
APC_IM_vircontig_352	7552	Bifidobacterium longum subsp. longum F8 draft genome	0	97.41	7557	No	3.50313
APC_IM_vircontig_353	7546	No hit	No hit	No hit	No hit	No	33.5345
APC_IM_vircontig_354	7536	Lactococcus phage 936 group phage PhiB1127, complete genome	0	93.69	4962	No	2.59699
APC_IM_vircontig_355	7532	Bacteroides helcogenes P 36-108, complete genome	3e-14	85.26	95	No	7.4766
APC_IM_vircontig_356	7514	Bifidobacterium breve strain 082W48 chromosome, complete genome	0	93.59	5318	No	2.8347
APC_IM_vircontig_357	7449	Bacteroides vulgatus ATCC 8482, complete genome	0	94.85	1164	No	15.3675
APC_IM_vircontig_358	7448	Prevotella dentalis DSM 3688 chromosome 2, complete sequence	0	79.17	2208	No	2.88413
APC_IM_vircontig_359	7444	Enterobacter asburiae strain ATCC 35953, complete sequence	0	95.35	1743	No	12.3343
APC_IM_vircontig_36	44591	Clostridiales sp. SM4/1 draft genome	1e-149	83.81	593	Yes	3.96907
APC_IM_vircontig_360	7429	No hit	No hit	No hit	No hit	No	3.56439
APC_IM_vircontig_361	7427	No hit	No hit	No hit	No hit	No	133.343
APC_IM_vircontig_362	7396	Candidatus Saccharibacteria oral taxon TM7x, complete genome	0	80.47	5534	No	2.3525
APC_IM_vircontig_363	7385	No hit	No hit	No hit	No hit	No	4.83744
APC_IM_vircontig_364	7372	Bifidobacterium adolescentis strain BBMN23, complete genome	0	92.62	2304	No	4.75775
APC_IM_vircontig_365	7338	Uncultured organism clone 1041059765050 genomic sequence	1e-126	74	1250	No	322.658
APC_IM_vircontig_366	7312	Anaerostipes hadrus strain BPB5, complete genome	0	94.22	7317	No	50.6734
APC_IM_vircontig_367	7306	No hit	No hit	No hit	No hit	No	5.82118
APC_IM_vircontig_368	7250	Candidatus Saccharibacteria oral taxon TM7x, complete genome	0	87.3	1968	No	3.46603
APC_IM_vircontig_369	7217	Faecalibacterium prausnitzii L2/6 draft genome	0	88.6	4043	No	4.2294
APC_IM_vircontig_37	43635	Uncultured bacterium clone LM0ABA41ZF07RM1 genomic sequence	6e-112	79.71	616	No	6.07692
APC_IM_vircontig_370	7215	Lactococcus phage CB20, complete genome	0	86.28	7257	No	4.16868
APC_IM_vircontig_371	7213	Clostridium butyricum strain TK520 chromosome 2, complete sequence	0	79.92	1006	No	7.93754
APC_IM_vircontig_372	7190	No hit	No hit	No hit	No hit	No	6.4984
APC_IM_vircontig_373	7158	No hit	No hit	No hit	No hit	No	6.1223
APC_IM_vircontig_374	7132	No hit	No hit	No hit	No hit	No	2.6929
APC_IM_vircontig_375	7121	No hit	No hit	No hit	No hit	No	2.88476
APC_IM_vircontig_376	7108	Lactobacillus rhamnosus LOCK908, complete genome	0	99.82	4916	No	5.41838
APC_IM_vircontig_377	7082	Roseburia hominis A2-183, complete genome	3e-117	97.28	257	No	9.8014
APC_IM_vircontig_378	7042	No hit	No hit	No hit	No hit	No	4.0509
APC_IM_vircontig_379	7039	No hit	No hit	No hit	No hit	Yes	2.28608
APC_IM_vircontig_38	43549	Escherichia coli strain S51, complete genome	0	96.72	17369	No	4.68088
APC_IM_vircontig_380	7029	Staphylococcus piscifermentans strain NCTC13836 genome assembly, chromosome: 1	2e-35	79.18	245	No	3.00194
APC_IM_vircontig_381	6955	No hit	No hit	No hit	No hit	No	5.48608
APC_IM_vircontig_382	6911	Veillonella rodentium strain NCTC12018 genome assembly, chromosome: 1	0	89.07	567	No	38.6509
APC_IM_vircontig_383	6878	No hit	No hit	No hit	No hit	No	4.2096
APC_IM_vircontig_384	6861	No hit	No hit	No hit	No hit	No	4.19987
APC_IM_vircontig_385	6852	No hit	No hit	No hit	No hit	No	3.705
APC_IM_vircontig_386	6848	No hit	No hit	No hit	No hit	No	3.19571
APC_IM_vircontig_387	6846	No hit	No hit	No hit	No hit	No	15.1876
APC_IM_vircontig_388	6840	Human adenovirus C strain human/ARG/A8649/2005/2[P2H2F2], complete genome	0	99.91	6841	No	3.57171
APC_IM_vircontig_389	6836	Bifidobacterium longum subsp. infantis ATCC 15697 = JCM 1222 = DSM 20088 DNA, complete genome	0	97.87	1640	No	3.19281
APC_IM_vircontig_39	42716	Alistipes finegoldii DSM 17242, complete genome	7e-131	90.3	371	No	4.06213
APC_IM_vircontig_390	6820	No hit	No hit	No hit	No hit	No	2.88947
APC_IM_vircontig_391	6819	Lactococcus phage 936 group phage PhiS0139, complete genome	0	95.13	3227	No	7.7942
APC_IM_vircontig_392	6819	Bifidobacterium longum subsp. infantis ATCC 15697 = JCM 1222 = DSM 20088 DNA, complete genome	0	95.17	2879	No	5.50262
APC_IM_vircontig_393	6796	No hit	No hit	No hit	No hit	Yes	4.16176
APC_IM_vircontig_394	6760	Lactococcus phage R31, complete genome	0	95.53	3510	No	5.10827
APC_IM_vircontig_395	6744	No hit	No hit	No hit	No hit	No	3.47441
APC_IM_vircontig_396	6742	No hit	No hit	No hit	No hit	No	2.46124
APC_IM_vircontig_397	6719	Enterobacteria phage HK633, complete genome	0	96.02	1786	No	4.8294
APC_IM_vircontig_398	6688	Bacteroides dorei isolate HS1_L_1_B_010, complete genome	0	99.07	6594	No	9.6599
APC_IM_vircontig_399	6634	No hit	No hit	No hit	No hit	Yes	3.55395
APC_IM_vircontig_4	99121	Uncultured crAssphage, complete genome	0	97.28	31469	Yes	3.3125
APC_IM_vircontig_40	42206	Flavonifractor plautii strain YL31, complete genome	0	90.3	1217	No	2.84773
APC_IM_vircontig_400	6634	No hit	No hit	No hit	No hit	No	2.54389
APC_IM_vircontig_401	6627	Bifidobacterium longum subsp. longum strain CCUG30698, complete genome	0	99.33	2233	No	3.67701
APC_IM_vircontig_402	6606	No hit	No hit	No hit	No hit	Yes	3.3536
APC_IM_vircontig_403	6581	Clostridium sp. BNL1100, complete genome	6e-75	78.12	489	No	1.24983
APC_IM_vircontig_404	6580	No hit	No hit	No hit	No hit	No	5.7061
APC_IM_vircontig_405	6557	No hit	No hit	No hit	No hit	No	3.43207
APC_IM_vircontig_406	6547	No hit	No hit	No hit	No hit	No	4.14333
APC_IM_vircontig_407	6533	No hit	No hit	No hit	No hit	No	72.7716
APC_IM_vircontig_408	6528	Lactococcus phage P680, complete genome	0	91.33	3161	No	6.0353
APC_IM_vircontig_409	6516	No hit	No hit	No hit	No hit	No	7.88963
APC_IM_vircontig_41	41917	Chryseobacterium sp. IHBB 10212, complete genome	5e-13	73.57	280	No	5.28324
APC_IM_vircontig_410	6461	Eubacterium rectale DSM 17629 draft genome	0	95.92	3501	No	68.2051
APC_IM_vircontig_411	6442	No hit	No hit	No hit	No hit	No	2.77297
APC_IM_vircontig_412	6422	No hit	No hit	No hit	No hit	Yes	3.176
APC_IM_vircontig_413	6417	No hit	No hit	No hit	No hit	No	2.81933
APC_IM_vircontig_414	6406	Faecalibacterium prausnitzii strain Indica chromosome, complete genome	0	96.82	2233	No	7.1685
APC_IM_vircontig_415	6403	No hit	No hit	No hit	No hit	Yes	3.29153
APC_IM_vircontig_416	6399	Lactococcus Phage ASCC273, complete genome	0	93.2	3351	No	2.90709
APC_IM_vircontig_417	6391	Lactobacillus ruminis ATCC 27782, complete genome	0	84.54	2115	No	2.55414
APC_IM_vircontig_418	6390	No hit	No hit	No hit	No hit	No	32.6925
APC_IM_vircontig_419	6363	Gokushovirus WZ-2015a isolate 43Fra07, complete genome	0	82.39	2879	No	7.9613
APC_IM_vircontig_42	41459	Enterococcus faecium strain 16-346 chromosome, complete genome	0	73.32	2350	Yes	4.5712
APC_IM_vircontig_420	6358	No hit	No hit	No hit	No hit	No	3.6214
APC_IM_vircontig_421	6347	Bacteroides fragilis genome assembly BFBE1.1, chromosome : scaffold1	1e-176	95.04	403	No	117.49
APC_IM_vircontig_422	6321	No hit	No hit	No hit	No hit	Yes	3.08835
APC_IM_vircontig_423	6309	No hit	No hit	No hit	No hit	No	10.3277
APC_IM_vircontig_424	6284	No hit	No hit	No hit	No hit	No	4.38188
APC_IM_vircontig_425	6283	No hit	No hit	No hit	No hit	No	13.2693
APC_IM_vircontig_426	6240	Blautia coccoides strain YL58 genome	1e-51	73.76	606	No	23.1707
APC_IM_vircontig_427	6233	No hit	No hit	No hit	No hit	No	199.694
APC_IM_vircontig_428	6228	Lactococcus Phage ASCC544, complete genome	0	90.33	2928	No	166.405
APC_IM_vircontig_429	6223	No hit	No hit	No hit	No hit	No	3.75
APC_IM_vircontig_43	41058	No hit	No hit	No hit	No hit	No	22.1395
APC_IM_vircontig_430	6192	Flavonifractor plautii strain YL31, complete genome	2e-99	94	250	No	18.205
APC_IM_vircontig_431	6152	No hit	No hit	No hit	No hit	No	6.032
APC_IM_vircontig_432	6144	No hit	No hit	No hit	No hit	No	3.348
APC_IM_vircontig_433	6125	No hit	No hit	No hit	No hit	Yes	55.6985
APC_IM_vircontig_434	6083	No hit	No hit	No hit	No hit	No	2.93089
APC_IM_vircontig_435	6077	[Eubacterium] rectale ATCC 33656 chromosome, complete genome	0	97.78	6077	No	3.03189
APC_IM_vircontig_436	6001	Bacteroides dorei isolate HS2_L_2_B_045b, complete genome	3e-27	76.68	253	No	4.49287
APC_IM_vircontig_437	5975	No hit	No hit	No hit	No hit	Yes	3.49014
APC_IM_vircontig_438	5971	Candidatus Saccharibacteria oral taxon TM7x, complete genome	0	84.64	3112	No	7.2319
APC_IM_vircontig_439	5971	No hit	No hit	No hit	No hit	No	187.859
APC_IM_vircontig_44	40827	Bifidobacterium breve strain NRBB01 chromosome, complete genome	0	100	25413	No	4.60709
APC_IM_vircontig_440	5896	Veillonella parvula strain UTDB1-3, complete genome	0	86.73	957	No	2.88127
APC_IM_vircontig_441	5871	Faecalibacterium prausnitzii strain Indica chromosome, complete genome	2e-19	94.44	72	No	2.757
APC_IM_vircontig_442	5867	No hit	No hit	No hit	No hit	No	3.14774
APC_IM_vircontig_443	5864	Uncultured prokaryote from Rat gut metagenome metamobilome, isolate RGRH0450	1e-21	93.67	79	No	2.13817
APC_IM_vircontig_444	5851	Escherichia phage APC_JM3.2, complete genome	0	97.57	2553	No	3.98006
APC_IM_vircontig_445	5833	No hit	No hit	No hit	No hit	No	2.23691
APC_IM_vircontig_446	5811	Gokushovirus WZ-2015a isolate 41Mky07, complete genome	0	83.49	1454	Yes	3.49345
APC_IM_vircontig_447	5794	Enterobacter sp. E20, complete genome	0	86.66	2422	No	2.89426
APC_IM_vircontig_448	5791	Roseburia hominis A2-183, complete genome	0	92.04	4206	No	3.7455
APC_IM_vircontig_449	5788	Faecalibacterium prausnitzii L2/6 draft genome	0	99.78	4898	No	3.94668
APC_IM_vircontig_45	40636	Alistipes finegoldii DSM 17242, complete genome	0	98.01	9053	No	5.34119
APC_IM_vircontig_450	5774	Human gut gokushovirus isolate SH-CHD13, complete genome	0	89.74	2008	Yes	6.6504
APC_IM_vircontig_451	5735	Gokushovirus WZ-2015a isolate 40Chd434, complete genome	0	89.15	1078	Yes	3.25887
APC_IM_vircontig_452	5733	Enterobacter cloacae strain R11, complete genome	0	95.5	2245	No	4.62256
APC_IM_vircontig_453	5729	Bifidobacterium adolescentis strain 22L, complete genome	0	88.14	4647	No	5.4081
APC_IM_vircontig_454	5726	[Clostridium] sordellii genome assembly JGS6382, chromosome : 1	0	85.11	1618	No	4.31869
APC_IM_vircontig_455	5691	No hit	No hit	No hit	No hit	No	11.9315
APC_IM_vircontig_456	5660	Gokushovirus WZ-2015a isolate 51Fra19, complete genome	0	96.02	2763	Yes	11.5437
APC_IM_vircontig_457	5647	Torque teno mini virus 5 DNA, complete genome, isolate: TGP96	9e-142	91	389	No	5.74302
APC_IM_vircontig_458	5630	Faecalibacterium prausnitzii L2/6 draft genome	0	93.51	4252	No	5.72765
APC_IM_vircontig_459	5626	No hit	No hit	No hit	No hit	No	4.768
APC_IM_vircontig_46	40083	Blautia hansenii DSM 20583, complete genome	6e-97	99.51	204	No	9.6219
APC_IM_vircontig_460	5624	No hit	No hit	No hit	No hit	No	3.19018
APC_IM_vircontig_461	5527	Nitrosococcus oceani ATCC 19707, complete genome	8e-28	75.69	288	No	9.05
APC_IM_vircontig_462	5523	No hit	No hit	No hit	No hit	No	2.18552
APC_IM_vircontig_463	5516	Bacteroides vulgatus strain mpk genome	0	95.23	3063	No	6.29677
APC_IM_vircontig_464	5511	Bacteroides dorei isolate HS1_L_3_B_079, complete genome	9e-08	93.88	49	No	5.05489
APC_IM_vircontig_465	5510	No hit	No hit	No hit	No hit	No	3.16056
APC_IM_vircontig_466	5479	Gokushovirus WZ-2015a isolate 23Fra13, complete genome	8e-13	90.91	66	Yes	3.14024
APC_IM_vircontig_467	5477	Faecalibacterium prausnitzii L2/6 draft genome	0	87.36	2429	No	4.14255
APC_IM_vircontig_468	5469	Bifidobacterium longum subsp. infantis ATCC 15697 = JCM 1222 = DSM 20088 DNA, complete genome	0	93.36	2471	No	6.83969
APC_IM_vircontig_469	5412	Bacteriophage c2 complete genome	0	91.04	5423	No	3.96257
APC_IM_vircontig_47	39473	Flavonifractor plautii strain YL31, complete genome	2e-37	74.72	443	Yes	3.29894
APC_IM_vircontig_470	5403	Klebsiella pneumoniae strain FDAARGOS_444 chromosome, complete genome	0	84.02	1402	No	5.07709
APC_IM_vircontig_471	5368	No hit	No hit	No hit	No hit	No	2.49576
APC_IM_vircontig_472	5368	Sporosarcina ureae strain P32a, complete genome	2e-08	88.52	61	No	5.4046
APC_IM_vircontig_473	5359	Bacteroides caccae strain ATCC 43185, complete genome	0	91.46	1312	No	3.21844
APC_IM_vircontig_474	5353	Gokushovirus WZ-2015a isolate 51Fra19, complete genome	0	88.26	1082	Yes	2.42553
APC_IM_vircontig_475	5352	No hit	No hit	No hit	No hit	No	3.4172
APC_IM_vircontig_476	5322	Calothrix sp. NIES-2100 DNA, nearly complete genome	4e-06	93.33	45	No	2.62189
APC_IM_vircontig_477	5320	No hit	No hit	No hit	No hit	No	13.3228
APC_IM_vircontig_478	5275	Clostridiales sp. SS3/4 draft genome	0	86.59	1559	No	4.77429
APC_IM_vircontig_479	5273	Candidatus Saccharibacteria oral taxon TM7x, complete genome	0	84.02	5230	No	20.5606
APC_IM_vircontig_48	39364	No hit	No hit	No hit	No hit	No	3.24785
APC_IM_vircontig_480	5272	Alistipes finegoldii DSM 17242, complete genome	0	98.47	3979	No	2.8615
APC_IM_vircontig_481	5260	Escherichia coli strain S1, complete genome	0	96.74	1686	No	4.18006
APC_IM_vircontig_482	5245	Roseburia intestinalis XB6B4 draft genome	1e-20	74.29	315	No	2.46767
APC_IM_vircontig_483	5242	Human gut gokushovirus isolate SH-CHD2, complete genome	7e-88	75.06	774	Yes	2.7761
APC_IM_vircontig_484	5235	Human adenovirus C strain human/USA/Pitts_00109/1992/2[P2H2F2], complete genome	0	99.85	5193	No	8.8044
APC_IM_vircontig_485	5233	Bifidobacterium breve strain DRBB30 chromosome, complete genome	0	93.92	477	No	2.6722
APC_IM_vircontig_486	5222	No hit	No hit	No hit	No hit	No	3.2509
APC_IM_vircontig_487	5217	Bifidobacterium longum subsp. infantis ATCC 15697 = JCM 1222 = DSM 20088 DNA, complete genome	0	99.56	3401	No	3.09834
APC_IM_vircontig_488	5202	Lactococcus phage 936 group phage PhiG, complete genome	0	93.6	2235	No	2.64689
APC_IM_vircontig_489	5200	No hit	No hit	No hit	No hit	No	3.05584
APC_IM_vircontig_49	39361	No hit	No hit	No hit	No hit	No	13.4092
APC_IM_vircontig_490	5200	Escherichia coli 55989 chromosome, complete genome	0	98.44	3209	No	2.15116
APC_IM_vircontig_491	5165	Ruminococcus bromii L2-63 draft genome	2e-162	88.24	493	No	2.74109
APC_IM_vircontig_492	5157	Gokushovirus WZ-2015a isolate 06Mk06, complete genome	3e-91	77.68	587	Yes	2.09985
APC_IM_vircontig_493	5156	Human adenovirus C strain human/ARG/A8649/2005/2[P2H2F2], complete genome	0	99.94	5137	No	7.58643
APC_IM_vircontig_494	5155	Faecalibacterium prausnitzii L2/6 draft genome	0	99.82	1660	No	6.0224
APC_IM_vircontig_495	5154	No hit	No hit	No hit	No hit	No	2.06511
APC_IM_vircontig_496	5146	Faecalibacterium prausnitzii strain Indica chromosome, complete genome	4e-130	90.19	367	No	2.8675
APC_IM_vircontig_497	5125	No hit	No hit	No hit	No hit	No	2.07619
APC_IM_vircontig_498	5109	No hit	No hit	No hit	No hit	No	4.9803
APC_IM_vircontig_499	5096	Clostridiales sp. SM4/1 draft genome	0	95.43	613	No	5.1219
APC_IM_vircontig_5	96801	Uncultured crAssphage, complete genome	7e-40	72.61	617	No	2.58707
APC_IM_vircontig_50	39262	Streptococcus parauberis KCTC 11537, complete genome	8e-11	74.64	209	Yes	2.38942
APC_IM_vircontig_500	5090	No hit	No hit	No hit	No hit	No	6.4979
APC_IM_vircontig_501	5073	Human bocavirus isolate Rus-Nsc11 N2512 non-structural protein 1 (NS1), non-structural protein (NP1), minor capsid protein (VP1), and major capsid protein (VP2) genes, complete cds	0	99.22	5023	No	3.5092
APC_IM_vircontig_502	5066	Bifidobacterium longum subsp. longum strain AH1206, complete genome	0	99.98	5066	No	1.76306
APC_IM_vircontig_503	5040	No hit	No hit	No hit	No hit	No	5.5895
APC_IM_vircontig_504	5037	No hit	No hit	No hit	No hit	No	2.63965
APC_IM_vircontig_505	5029	No hit	No hit	No hit	No hit	No	6.0206
APC_IM_vircontig_506	5027	Bacteroides fragilis plasmid pBFUK1 DNA, complete genome, strain: GAI92082	0	80.43	1584	No	2.56361
APC_IM_vircontig_507	5018	Lactococcus phage 936 group phage PhiL.6, complete genome	0	95.68	2060	No	3.78979
APC_IM_vircontig_508	5012	No hit	No hit	No hit	No hit	No	3.45886
APC_IM_vircontig_509	5008	No hit	No hit	No hit	No hit	No	2.83395
APC_IM_vircontig_51	39242	Escherichia coli isolate E. coli NRZ14408 genome assembly, chromosome: NRZ14408_C	0	98.28	18610	Yes	2.85905
APC_IM_vircontig_510	5006	No hit	No hit	No hit	No hit	No	8.7135
APC_IM_vircontig_511	4998	Bifidobacterium longum subsp. longum F8 draft genome	0	98.47	3586	No	3.83222
APC_IM_vircontig_512	4986	No hit	No hit	No hit	No hit	No	283.149
APC_IM_vircontig_513	4977	Gokushovirus WZ-2015a isolate 04Fra22, complete genome	4e-110	78.66	642	Yes	178.576
APC_IM_vircontig_514	4968	Bifidobacterium bifidum ATCC 29521 = JCM 1255 = DSM 20456 DNA, complete genome	0	99.54	4968	No	3.94647
APC_IM_vircontig_515	4954	Faecalibacterium prausnitzii L2/6 draft genome	0	93.24	2472	No	6.6121
APC_IM_vircontig_516	4941	No hit	No hit	No hit	No hit	No	107.609
APC_IM_vircontig_517	4932	Lactococcus phage 936 group phage PhiJF1, complete genome	0	90.83	1963	No	3.45827
APC_IM_vircontig_518	4930	No hit	No hit	No hit	No hit	No	3.41524
APC_IM_vircontig_519	4919	No hit	No hit	No hit	No hit	No	3.47608
APC_IM_vircontig_52	39069	Ruminococcus torques L2-14 draft genome	0	85.45	1244	No	4.2043
APC_IM_vircontig_520	4917	Human polyomavirus 10 isolate 10ww, complete genome	0	99.91	4641	No	20.5255
APC_IM_vircontig_521	4871	Human gut gokushovirus isolate SH-CHD6, complete genome	0	88.77	2699	Yes	2.64189
APC_IM_vircontig_522	4870	No hit	No hit	No hit	No hit	No	3.64162
APC_IM_vircontig_523	4861	No hit	No hit	No hit	No hit	No	8.862
APC_IM_vircontig_524	4857	No hit	No hit	No hit	No hit	No	2.90211
APC_IM_vircontig_525	4849	Ruminococcus sp. SR1/5 draft genome	0	90.64	2093	No	19.5601
APC_IM_vircontig_526	4837	Parabacteroides distasonis ATCC 8503, complete genome	0	98.16	4789	No	14.4374
APC_IM_vircontig_527	4832	Escherichia coli strain 13E0780, complete genome	0	98.38	4452	No	9.22323
APC_IM_vircontig_528	4781	Uncultured bacterium clone HA0AAA11ZB03FM1 genomic sequence	0	99.56	685	No	4.67949
APC_IM_vircontig_529	4733	No hit	No hit	No hit	No hit	No	4.01735
APC_IM_vircontig_53	38588	Flexistipes sinusarabici DSM 4947, complete genome	6e-07	92.16	51	No	3.84465
APC_IM_vircontig_530	4731	Unidentified phage clone 2210_scaffold709 genomic sequence	0	97.93	4729	No	3.48567
APC_IM_vircontig_531	4715	No hit	No hit	No hit	No hit	No	16.0333
APC_IM_vircontig_532	4704	No hit	No hit	No hit	No hit	No	4.02042
APC_IM_vircontig_533	4696	Candidatus Saccharibacteria oral taxon TM7x, complete genome	0	78.77	3834	No	4.22879
APC_IM_vircontig_534	4695	No hit	No hit	No hit	No hit	No	15.5825
APC_IM_vircontig_535	4694	Faecalibacterium prausnitzii strain A2165 chromosome, complete genome	0	98.49	4697	No	39.2206
APC_IM_vircontig_536	4687	No hit	No hit	No hit	No hit	No	3.35027
APC_IM_vircontig_537	4676	Parabacteroides phage YZ-2015a, complete genome	0	90.81	2186	Yes	3.31387
APC_IM_vircontig_538	4665	Coprococcus catus GD/7 draft genome	0	85.52	1575	No	9.9585
APC_IM_vircontig_539	4664	Roseburia intestinalis XB6B4 draft genome	9e-17	80.67	150	No	2195.96
APC_IM_vircontig_54	37953	Bifidobacterium longum subsp. infantis genome assembly Bifidobacterium longum subsp. infantis CECT7210, chromosome : I	0	88.68	6230	No	3.481
APC_IM_vircontig_540	4663	Lactococcus phage P680, complete genome	0	95.6	4663	No	8.7133
APC_IM_vircontig_541	4656	No hit	No hit	No hit	No hit	No	3.52143
APC_IM_vircontig_542	4643	No hit	No hit	No hit	No hit	No	231.076
APC_IM_vircontig_543	4632	No hit	No hit	No hit	No hit	No	4.46789
APC_IM_vircontig_544	4626	No hit	No hit	No hit	No hit	No	34.1861
APC_IM_vircontig_545	4616	Weissella ceti strain WS105, complete genome	1e-10	84.34	83	No	3.94785
APC_IM_vircontig_546	4606	No hit	No hit	No hit	No hit	No	3.49232
APC_IM_vircontig_547	4606	No hit	No hit	No hit	No hit	No	5.24923
APC_IM_vircontig_548	4601	No hit	No hit	No hit	No hit	No	4.02
APC_IM_vircontig_549	4597	Unidentified phage clone 2203_scaffold802 genomic sequence	2e-18	74.72	265	No	5.70901
APC_IM_vircontig_55	37597	Paludibacter propionicigenes WB4, complete genome	3e-15	98.25	57	Yes	4.11778
APC_IM_vircontig_550	4593	No hit	No hit	No hit	No hit	No	11.4705
APC_IM_vircontig_551	4593	Eubacterium sp. Marseille-P3177 strain Marseille-P3177T genome assembly, chromosome: contig00001	3e-56	71.77	953	No	2.27042
APC_IM_vircontig_552	4584	No hit	No hit	No hit	No hit	No	2.7963
APC_IM_vircontig_553	4569	Bifidobacterium breve strain DRBB28 chromosome, complete genome	0	99.56	4570	No	8.02394
APC_IM_vircontig_554	4567	No hit	No hit	No hit	No hit	No	4.05878
APC_IM_vircontig_555	4541	No hit	No hit	No hit	No hit	No	8.0193
APC_IM_vircontig_556	4538	No hit	No hit	No hit	No hit	No	10.7972
APC_IM_vircontig_557	4530	Bacteroides dorei isolate HS1_L_3_B_079, complete genome	0	97.37	3607	No	3.80945
APC_IM_vircontig_558	4522	No hit	No hit	No hit	No hit	No	2.77614
APC_IM_vircontig_559	4517	No hit	No hit	No hit	No hit	No	10.39
APC_IM_vircontig_56	37009	Enterococcus rotai strain LMG 26678 genome	0	80.57	2393	No	3.46822
APC_IM_vircontig_560	4489	Veillonella rodentium strain NCTC12018 genome assembly, chromosome: 1	4e-50	75.92	436	No	720.312
APC_IM_vircontig_561	4485	Enterobacter cloacae strain AR_0050, complete genome	0	93.99	4494	No	2.28594
APC_IM_vircontig_562	4484	No hit	No hit	No hit	No hit	No	2.37227
APC_IM_vircontig_563	4484	No hit	No hit	No hit	No hit	No	2.87217
APC_IM_vircontig_564	4482	Unidentified virus strain BF.32 hypothetical protein genes, complete cds	0	97.53	2756	No	3.66693
APC_IM_vircontig_565	4477	Lactococcus phage 936 group phage PhiLj, complete genome	0	90.86	2452	No	10.4824
APC_IM_vircontig_566	4469	Escherichia coli P12b, complete genome	0	95.88	2620	No	4.45902
APC_IM_vircontig_567	4457	Parabacteroides distasonis ATCC 8503, complete genome	0	78.34	1316	No	25.8023
APC_IM_vircontig_568	4456	No hit	No hit	No hit	No hit	No	3.5446
APC_IM_vircontig_569	4444	Corynebacterium phage Poushou, complete genome	9e-07	88.14	59	No	4.44097
APC_IM_vircontig_57	36629	Unidentified phage clone 2011_scaffold13 genomic sequence	4e-168	82.08	720	Yes	48.0382
APC_IM_vircontig_570	4438	Faecalibacterium prausnitzii strain A2165 chromosome, complete genome	0	95.97	3203	No	3.65258
APC_IM_vircontig_571	4428	Petrimonas mucosa isolate ING2-E5A genome assembly, chromosome: I	0	93.04	1551	No	34.2218
APC_IM_vircontig_572	4408	Uncultured organism clone VC1AA20TR genomic sequence	0	94.59	924	No	3.21708
APC_IM_vircontig_573	4399	No hit	No hit	No hit	No hit	No	1.86912
APC_IM_vircontig_574	4394	No hit	No hit	No hit	No hit	No	5.2397
APC_IM_vircontig_575	4394	No hit	No hit	No hit	No hit	No	5.1241
APC_IM_vircontig_576	4392	No hit	No hit	No hit	No hit	No	4.64965
APC_IM_vircontig_577	4385	Paenibacillus sabinae T27, complete genome	1e-09	97.78	45	No	3.85917
APC_IM_vircontig_578	4357	Lactococcus phage 936 group phage Phi19, complete genome	0	95.7	3141	No	2.25039
APC_IM_vircontig_579	4350	No hit	No hit	No hit	No hit	No	4.0679
APC_IM_vircontig_58	36625	Eubacterium rectale M104/1 draft genome	5e-132	86.49	459	No	2.14759
APC_IM_vircontig_580	4344	Unidentified virus strain Ch.85 hypothetical protein genes, complete cds	0	97.26	839	No	13.53
APC_IM_vircontig_581	4333	Mageeibacillus indolicus UPII9-5, complete genome	0	99.19	4334	No	3.67378
APC_IM_vircontig_582	4303	No hit	No hit	No hit	No hit	No	2.66351
APC_IM_vircontig_583	4297	Gokushovirus WZ-2015a isolate 16IC3, complete genome	0	91.47	1559	No	2.48259
APC_IM_vircontig_584	4287	Candidatus Saccharibacteria oral taxon TM7x, complete genome	0	77.63	2199	No	2.34335
APC_IM_vircontig_585	4271	No hit	No hit	No hit	No hit	No	1158.05
APC_IM_vircontig_586	4251	Lactococcus phage 936 group phage PhiM.5, complete genome	0	92.96	1407	No	2.68676
APC_IM_vircontig_587	4241	No hit	No hit	No hit	No hit	No	1.69151
APC_IM_vircontig_588	4235	Faecalibacterium prausnitzii strain Indica chromosome, complete genome	0	84.44	900	No	10.2595
APC_IM_vircontig_589	4221	Eubacterium siraeum V10Sc8a draft genome	0	96.39	4236	No	4.0373
APC_IM_vircontig_59	36490	Enterococcus faecium strain 64/3xUW2774 plasmid pLG1 transposase (pLG1-0251), regulatory protein GntR (pLG1-0252), sugar isomerase (pLG1-0253), and DeoC/LacD family aldolase (pLG1-0254) genes, complete cds; and hypothetical protein (pLG1-0255) gene, partial cds	0	96.67	1471	No	2.278
APC_IM_vircontig_590	4219	No hit	No hit	No hit	No hit	No	25.9698
APC_IM_vircontig_591	4210	No hit	No hit	No hit	No hit	No	4.14467
APC_IM_vircontig_592	4190	Bifidobacterium breve strain DRBB30 chromosome, complete genome	0	97.78	4195	No	2.45946
APC_IM_vircontig_593	4169	No hit	No hit	No hit	No hit	No	1.78696
APC_IM_vircontig_594	4158	No hit	No hit	No hit	No hit	No	2.43392
APC_IM_vircontig_595	4128	Bifidobacterium longum strain Su859 genome assembly, chromosome: I	0	98.16	1468	No	2.23108
APC_IM_vircontig_596	4126	[Eubacterium] hallii isolate EH1 genome assembly, chromosome: I	0	99.37	2872	No	2.14104
APC_IM_vircontig_597	4111	No hit	No hit	No hit	No hit	No	4.87241
APC_IM_vircontig_598	4098	Faecalibacterium prausnitzii L2/6 draft genome	0	90.22	4092	No	3.73083
APC_IM_vircontig_599	4089	Unidentified phage clone 2210_scaffold709 genomic sequence	0	99.5	3424	No	10.352
APC_IM_vircontig_6	79465	No hit	No hit	No hit	No hit	Yes	4.7384
APC_IM_vircontig_60	36263	Candidatus Saccharibacteria oral taxon TM7x, complete genome	0	77.93	10334	No	3.76122
APC_IM_vircontig_600	4086	No hit	No hit	No hit	No hit	No	2.19326
APC_IM_vircontig_601	4077	No hit	No hit	No hit	No hit	No	1.91339
APC_IM_vircontig_602	4071	Escherichia coli IAI1 chromosome, complete genome	0	95.97	2532	No	81.2074
APC_IM_vircontig_603	4046	No hit	No hit	No hit	No hit	No	2.45586
APC_IM_vircontig_604	4039	Escherichia coli strain 13E0780, complete genome	0	96.92	3048	No	4.1868
APC_IM_vircontig_605	4015	Flavonifractor plautii strain YL31, complete genome	5e-118	90.24	338	No	3.36466
APC_IM_vircontig_606	4014	Actinobacillus suis H91-0380, complete genome	5e-108	80.18	570	No	2.90997
APC_IM_vircontig_607	4010	Faecalibacterium prausnitzii SL3/3 draft genome	0	98.17	2950	No	23.1419
APC_IM_vircontig_608	3993	No hit	No hit	No hit	No hit	No	3.9236
APC_IM_vircontig_609	3990	No hit	No hit	No hit	No hit	No	8.0101
APC_IM_vircontig_61	35383	Faecalibacterium prausnitzii L2/6 draft genome	6e-116	80.42	577	No	2.83793
APC_IM_vircontig_610	3986	Bifidobacterium longum subsp. infantis ATCC 15697 = JCM 1222 = DSM 20088 DNA, complete genome	0	96.13	1136	No	2.30551
APC_IM_vircontig_611	3985	Eubacterium siraeum 70/3 draft genome	5e-09	94	50	No	5.45823
APC_IM_vircontig_612	3964	Lactococcus phage 936 group phage Phi19, complete genome	0	95.11	1923	No	2.44444
APC_IM_vircontig_613	3963	Enterococcus faecium isolate 2014-VREF-114, complete genome	0	98.56	2570	No	2.8554
APC_IM_vircontig_614	3946	No hit	No hit	No hit	No hit	No	3.04557
APC_IM_vircontig_615	3943	Escherichia coli strain Ecol_881	0	93.39	2089	No	12.4821
APC_IM_vircontig_616	3941	Lactococcus phage 936 group phage PhiL.6, complete genome	0	94.1	2084	No	2.99021
APC_IM_vircontig_617	3914	[Clostridium] saccharolyticum WM1, complete genome	1e-178	73.97	1771	No	1.40538
APC_IM_vircontig_618	3913	Blautia hansenii DSM 20583, complete genome	0	97.52	3870	No	2.84816
APC_IM_vircontig_619	3897	Lactococcus lactis phage KSY1, complete genome	0	89.14	1280	No	3.10784
APC_IM_vircontig_62	35045	Ralstonia mannitolilytica strain SN82F48 chromosome 1, complete sequence	1e-08	85.19	81	No	4.17416
APC_IM_vircontig_620	3897	Bifidobacterium longum subsp. longum GT15, complete genome	0	99.82	3848	No	3.48733
APC_IM_vircontig_621	3890	No hit	No hit	No hit	No hit	No	65.905
APC_IM_vircontig_622	3875	Uncultured organism clone VC1C408TF genomic sequence	5e-78	76.63	599	No	55.0483
APC_IM_vircontig_623	3861	Prevotella enoeca strain F0113, complete genome	8e-12	91.94	62	No	3.44472
APC_IM_vircontig_624	3859	No hit	No hit	No hit	No hit	No	2.57002
APC_IM_vircontig_625	3841	Faecalibacterium prausnitzii L2/6 draft genome	0	86.91	741	No	5.8769
APC_IM_vircontig_626	3836	Clostridiales sp. SM4/1 draft genome	0	75.84	1631	No	3.38259
APC_IM_vircontig_627	3827	No hit	No hit	No hit	No hit	No	2.11422
APC_IM_vircontig_628	3825	Clostridiales sp. SS3/4 draft genome	3e-06	90.2	51	No	2.47862
APC_IM_vircontig_629	3816	Clostridium botulinum 202F plasmid pCBI, complete sequence	0	80.92	2400	No	2.24671
APC_IM_vircontig_63	34904	Veillonella parvula strain UTDB1-3, complete genome	0	88.91	2470	No	6.5028
APC_IM_vircontig_630	3813	Faecalibacterium prausnitzii L2/6 draft genome	0	82.45	1322	No	8.06255
APC_IM_vircontig_631	3809	TPA_exp: Clostridium difficile strain QCD-66C26 transposon Tn6110, complete sequence	0	94.17	2180	No	3.7572
APC_IM_vircontig_632	3807	Bifidobacterium adolescentis strain 22L, complete genome	0	86.08	3800	No	28.8211
APC_IM_vircontig_633	3799	Lactobacillus rhamnosus LOCK908, complete genome	0	99.97	3757	No	9.8681
APC_IM_vircontig_634	3793	Klebsiella pneumoniae strain Kpn555, complete genome	0	97.94	3791	No	3.45087
APC_IM_vircontig_635	3793	Lactobacillus ruminis ATCC 27782, complete genome	0	92	1388	No	5.39504
APC_IM_vircontig_636	3791	Prevotella fusca JCM 17724 strain W1435 chromosome 2, complete sequence	0	78.79	2551	No	2.41322
APC_IM_vircontig_637	3788	Uncultured prokaryote from Rat gut metagenome metamobilome, isolate RGFK1133	2e-157	81.82	682	No	6.8553
APC_IM_vircontig_638	3783	Human adenovirus C strain human/USA/Pitts_00109/1992/2[P2H2F2], complete genome	0	99.92	3738	No	3.985
APC_IM_vircontig_639	3780	Torque teno virus complete genome, isolate HD13a gsB20.33	0	94.33	3666	No	2.61538
APC_IM_vircontig_64	34866	No hit	No hit	No hit	No hit	No	2.57899
APC_IM_vircontig_640	3773	Lactococcus phage CB13, complete genome	2e-122	87.13	404	No	2.51325
APC_IM_vircontig_641	3770	Lactobacillus salivarius str. Ren, complete genome	0	84.08	1112	No	5.8179
APC_IM_vircontig_642	3762	Flavonifractor plautii strain YL31, complete genome	1e-34	78.08	260	No	2.4913
APC_IM_vircontig_643	3756	No hit	No hit	No hit	No hit	No	8.9311
APC_IM_vircontig_644	3749	Torque teno virus, isolate tth8, complete genome	0	77.52	1735	No	43.9563
APC_IM_vircontig_645	3747	Bifidobacterium breve strain LMC520, complete genome	0	99.01	3725	No	3.58223
APC_IM_vircontig_646	3742	Lactobacillus ruminis ATCC 27782, complete genome	0	81.89	2120	No	3.46839
APC_IM_vircontig_647	3742	Lactococcus phage M6653, complete genome	0	86.63	3755	No	2.74355
APC_IM_vircontig_648	3740	No hit	No hit	No hit	No hit	No	3.065
APC_IM_vircontig_649	3739	Lactococcus phage 936 group phage PhiA1127, complete genome	0	94.4	1519	No	6.8335
APC_IM_vircontig_65	34493	Bacteroides dorei isolate HS1_L_3_B_079, complete genome	0	97.21	18729	No	2.29691
APC_IM_vircontig_650	3737	No hit	No hit	No hit	No hit	No	5.38931
APC_IM_vircontig_651	3716	No hit	No hit	No hit	No hit	No	2.2005
APC_IM_vircontig_652	3714	No hit	No hit	No hit	No hit	No	4.04519
APC_IM_vircontig_653	3708	Uncultured bacterium clone LM0ACA20ZE01FM1 genomic sequence	0	98.99	397	No	4.67755
APC_IM_vircontig_654	3702	Escherichia coli genome assembly FHI74, scaffold scaffold-15_contig-8.0_1_33683_[organism:Escherichia	0	99.01	2518	No	4.16834
APC_IM_vircontig_655	3702	No hit	No hit	No hit	No hit	No	7.1689
APC_IM_vircontig_656	3700	Streptococcus phage DCC1738, complete sequence	1e-05	88.68	53	No	7.7846
APC_IM_vircontig_657	3699	No hit	No hit	No hit	No hit	No	3.76865
APC_IM_vircontig_658	3695	Torque teno virus isolate LTT10 ORF1 gene, complete cds	0	98.3	2874	No	4.9078
APC_IM_vircontig_659	3692	Escherichia coli strain H6, complete genome	0	95.42	2203	No	3.46516
APC_IM_vircontig_66	34165	No hit	No hit	No hit	No hit	Yes	4.12941
APC_IM_vircontig_660	3690	Coprococcus catus GD/7 draft genome	0	99.26	3365	No	3.60893
APC_IM_vircontig_661	3690	No hit	No hit	No hit	No hit	No	2.51556
APC_IM_vircontig_662	3684	Faecalibacterium prausnitzii strain Indica chromosome, complete genome	0	96.82	2544	No	5.3047
APC_IM_vircontig_663	3682	No hit	No hit	No hit	No hit	No	2.30556
APC_IM_vircontig_664	3680	Roseburia hominis A2-183, complete genome	0	99.34	2737	No	1.9258
APC_IM_vircontig_665	3679	No hit	No hit	No hit	No hit	No	101.31
APC_IM_vircontig_666	3670	Torque teno virus isolate P18-1 ORF1 gene, complete cds	0	80.27	1318	No	3.46751
APC_IM_vircontig_667	3648	No hit	No hit	No hit	No hit	No	2.06086
APC_IM_vircontig_668	3643	No hit	No hit	No hit	No hit	No	44.4298
APC_IM_vircontig_669	3642	No hit	No hit	No hit	No hit	No	19.2986
APC_IM_vircontig_67	33731	Enterococcus faecium strain E232 chromosome, complete genome	3e-114	93.99	283	No	3.40525
APC_IM_vircontig_670	3640	Lobelia holstii plastid, complete genome	2e-13	94.92	59	No	4.31186
APC_IM_vircontig_671	3634	Faecalibacterium prausnitzii strain Indica chromosome, complete genome	4e-84	90.69	247	No	3.80254
APC_IM_vircontig_672	3631	No hit	No hit	No hit	No hit	No	3.43729
APC_IM_vircontig_673	3623	Uncultured bacterium clone LM0ABA4ZD08RM1 genomic sequence	0	98.07	724	No	20.715
APC_IM_vircontig_674	3622	No hit	No hit	No hit	No hit	No	4.20865
APC_IM_vircontig_675	3615	TTV-like mini virus isolate TTMV-204, complete genome	3e-135	88	425	No	2.46265
APC_IM_vircontig_676	3610	Bifidobacterium longum subsp. infantis genome assembly Bifidobacterium longum subsp. infantis CECT7210, chromosome : I	0	93.86	1710	No	5.1932
APC_IM_vircontig_677	3602	Bacteroides fragilis 638R genome	0	99.78	3602	No	4.69558
APC_IM_vircontig_678	3578	Candidatus Saccharibacteria oral taxon TM7x, complete genome	2e-42	92.97	128	No	2.74809
APC_IM_vircontig_679	3577	Torque teno virus 20 ORF4, ORF3, ORF2, ORF1 genes, complete cds, clone: SAa-10	0	92.47	3149	No	7.4846
APC_IM_vircontig_68	33677	Enterococcus durans strain KLDS 6.0930, complete genome	0	75.17	6674	No	3.83901
APC_IM_vircontig_680	3571	Escherichia coli P12b, complete genome	0	99.16	2016	No	4.32509
APC_IM_vircontig_681	3543	Ralstonia solanacearum genome assembly 9 genomes, chromosome : IX	1e-28	98.73	79	No	6.8265
APC_IM_vircontig_682	3543	No hit	No hit	No hit	No hit	No	4.73522
APC_IM_vircontig_683	3543	Bifidobacterium breve JCM 7019, complete genome	1e-178	97.34	376	No	3.3928
APC_IM_vircontig_684	3536	Bacteroides dorei isolate HS2_L_2_B_045b, complete genome	0	88.89	1107	No	5.78418
APC_IM_vircontig_685	3534	Eubacterium sp. Marseille-P3177 strain Marseille-P3177T genome assembly, chromosome: contig00001	0	80.83	2274	No	3.79536
APC_IM_vircontig_686	3530	No hit	No hit	No hit	No hit	No	5.99398
APC_IM_vircontig_687	3528	Lactococcus phage 936 group phage PhiS0139, complete genome	0	90.42	3550	No	10.8982
APC_IM_vircontig_688	3521	No hit	No hit	No hit	No hit	No	7.0206
APC_IM_vircontig_689	3520	No hit	No hit	No hit	No hit	No	29.3042
APC_IM_vircontig_69	33431	No hit	No hit	No hit	No hit	Yes	3.23682
APC_IM_vircontig_690	3518	Streptococcus pyogenes strain M23ND, complete genome	3e-06	95.24	42	No	3.05359
APC_IM_vircontig_691	3515	Bacteroides fragilis strain BOB25, complete genome	0	99.69	3515	No	61.6099
APC_IM_vircontig_692	3498	Faecalibacterium prausnitzii L2/6 draft genome	0	93.51	3498	No	5.2197
APC_IM_vircontig_693	3498	Escherichia coli plasmid pMG828-4, complete sequence	0	94.74	3079	No	11.1462
APC_IM_vircontig_694	3489	No hit	No hit	No hit	No hit	No	2.47186
APC_IM_vircontig_695	3480	Torque teno virus complete genome, isolate TTV-HD18a (uro703)	0	95.89	3305	No	3.10139
APC_IM_vircontig_696	3471	Lactococcus phage 936 group phage Phi129, complete genome	0	96.27	2895	No	4.02255
APC_IM_vircontig_697	3471	Uncultured bacterium clone PE_040101_Contig_5 genomic sequence	0	98.39	372	No	3.68897
APC_IM_vircontig_698	3468	Enterobacter asburiae strain CAV1043, complete genome	0	93.71	1718	No	6.2197
APC_IM_vircontig_699	3468	Bifidobacterium scardovii JCM 12489 = DSM 13734 DNA, complete genome	0	83.97	892	No	8.4913
APC_IM_vircontig_7	72405	Proteiniphilum saccharofermentans isolate M3/6 genome assembly, chromosome: I	0	77.88	4678	No	7.61478
APC_IM_vircontig_70	33258	Lactobacillus ruminis ATCC 27782, complete genome	2e-65	83.92	286	No	4.6747
APC_IM_vircontig_700	3465	Faecalibacterium prausnitzii L2/6 draft genome	0	98.53	2518	No	12.3757
APC_IM_vircontig_701	3458	Lactococcus phage CaseusJM1, complete genome	0	98.24	2440	No	2.77594
APC_IM_vircontig_702	3454	Faecalibacterium prausnitzii SL3/3 draft genome	0	94.37	3464	No	3.98
APC_IM_vircontig_703	3450	No hit	No hit	No hit	No hit	No	3.45979
APC_IM_vircontig_704	3449	No hit	No hit	No hit	No hit	No	94.8898
APC_IM_vircontig_705	3446	No hit	No hit	No hit	No hit	No	4.17498
APC_IM_vircontig_706	3436	No hit	No hit	No hit	No hit	No	5.0868
APC_IM_vircontig_707	3434	Klebsiella pneumoniae strain AR_0107, complete genome	0	100	3434	No	18.1646
APC_IM_vircontig_708	3433	Bifidobacterium longum subsp. longum strain AH1206, complete genome	0	98.88	1159	No	4.76795
APC_IM_vircontig_709	3427	No hit	No hit	No hit	No hit	No	2.67018
APC_IM_vircontig_71	33170	No hit	No hit	No hit	No hit	No	3.2827
APC_IM_vircontig_710	3426	Bacteroides fragilis YCH46 DNA, complete genome	0	99.59	3380	No	3.45606
APC_IM_vircontig_711	3424	No hit	No hit	No hit	No hit	No	2.49428
APC_IM_vircontig_712	3422	Torque teno mini virus 7 DNA, complete genome, isolate: TLMV-CLC156	1e-113	87.43	374	No	5.10563
APC_IM_vircontig_713	3404	Dolichospermum compactum NIES-806 DNA, nearly complete genome	9e-11	100	44	No	3.07923
APC_IM_vircontig_714	3402	No hit	No hit	No hit	No hit	No	2.0679
APC_IM_vircontig_715	3401	Unidentified phage clone 2210_scaffold709 genomic sequence	0	99.26	3400	No	4.68402
APC_IM_vircontig_716	3394	Torque teno virus isolate P18-1 ORF1 gene, complete cds	0	84.52	1311	No	3.68789
APC_IM_vircontig_717	3389	No hit	No hit	No hit	No hit	No	6.98673
APC_IM_vircontig_718	3377	No hit	No hit	No hit	No hit	No	2.18673
APC_IM_vircontig_719	3376	Faecalibacterium prausnitzii L2/6 draft genome	0	95.44	1668	No	3.44898
APC_IM_vircontig_72	32756	No hit	No hit	No hit	No hit	No	3.15084
APC_IM_vircontig_720	3369	No hit	No hit	No hit	No hit	No	2.44898
APC_IM_vircontig_721	3358	No hit	No hit	No hit	No hit	No	5.7953
APC_IM_vircontig_722	3346	Faecalibacterium prausnitzii SL3/3 draft genome	0	94.81	1349	No	34.5622
APC_IM_vircontig_723	3342	No hit	No hit	No hit	No hit	No	4.75844
APC_IM_vircontig_724	3339	TT virus gene for ORF1, ORF2, ORF3, ORF4, complete cds, clone:SAj-30	0	77.42	1568	No	3.32682
APC_IM_vircontig_725	3335	Bifidobacterium longum subsp. infantis genome assembly Bifidobacterium longum subsp. infantis CECT7210, chromosome : I	0	78.17	2231	No	4.08711
APC_IM_vircontig_726	3322	No hit	No hit	No hit	No hit	No	5.90658
APC_IM_vircontig_727	3319	Coprococcus sp. ART55/1 draft genome	0	99.19	3213	No	2.29501
APC_IM_vircontig_728	3314	No hit	No hit	No hit	No hit	No	2.08289
APC_IM_vircontig_729	3314	No hit	No hit	No hit	No hit	No	5.71964
APC_IM_vircontig_73	32520	Mycoplasma bovigenitalium DNA, complete genome	2e-15	89.74	78	No	2.80804
APC_IM_vircontig_730	3312	No hit	No hit	No hit	No hit	No	1.75089
APC_IM_vircontig_731	3310	No hit	No hit	No hit	No hit	No	1.55446
APC_IM_vircontig_732	3310	No hit	No hit	No hit	No hit	No	2.55009
APC_IM_vircontig_733	3308	Lactobacillus ruminis ATCC 27782, complete genome	0	84.13	1512	No	2.50717
APC_IM_vircontig_734	3308	No hit	No hit	No hit	No hit	No	2.59425
APC_IM_vircontig_735	3307	No hit	No hit	No hit	No hit	No	4.01348
APC_IM_vircontig_736	3305	No hit	No hit	No hit	No hit	No	8.1551
APC_IM_vircontig_737	3305	No hit	No hit	No hit	No hit	No	4.31593
APC_IM_vircontig_738	3301	Escherichia coli strain 13E0767, complete genome	0	97.08	3250	No	3.45365
APC_IM_vircontig_739	3292	No hit	No hit	No hit	No hit	No	4
APC_IM_vircontig_74	32495	No hit	No hit	No hit	No hit	No	3.15766
APC_IM_vircontig_740	3278	Faecalibacterium prausnitzii L2/6 draft genome	1e-73	89.82	226	No	2.98829
APC_IM_vircontig_741	3275	Uncultured bacterium extrachromosomal DNA RGI01377	0	94.65	1028	No	118.816
APC_IM_vircontig_742	3267	Escherichia coli IAI39 chromosome, complete genome	0	99.97	3267	No	2.64743
APC_IM_vircontig_743	3264	No hit	No hit	No hit	No hit	No	7.44575
APC_IM_vircontig_744	3264	No hit	No hit	No hit	No hit	No	2.33725
APC_IM_vircontig_745	3241	No hit	No hit	No hit	No hit	No	4.8544
APC_IM_vircontig_746	3240	No hit	No hit	No hit	No hit	No	6.07149
APC_IM_vircontig_747	3239	No hit	No hit	No hit	No hit	No	2.64163
APC_IM_vircontig_748	3239	Faecalibacterium prausnitzii L2/6 draft genome	0	94.71	2856	No	4.5259
APC_IM_vircontig_749	3220	No hit	No hit	No hit	No hit	No	19.6332
APC_IM_vircontig_75	31896	Lactococcus phage 86501, complete genome	4e-33	78.9	237	No	3.84149
APC_IM_vircontig_750	3202	Lactococcus lactis subsp. lactis strain 275, complete genome	0	95.87	1865	No	3.10779
APC_IM_vircontig_751	3200	Escherichia coli strain C7, complete genome	0	100	3200	No	2.87138
APC_IM_vircontig_752	3191	[Eubacterium] rectale ATCC 33656 chromosome, complete genome	0	97.34	3043	No	2.66848
APC_IM_vircontig_753	3191	TTV-like mini virus isolate TTMV_LY3, complete genome	4e-143	74.68	1323	No	3.47053
APC_IM_vircontig_754	3190	Uncultured crAssphage, complete genome	0	96.92	1720	No	4.0725
APC_IM_vircontig_755	3190	Gokushovirus WZ-2015a isolate 45Mky19, complete genome	8e-170	84	650	No	2.81942
APC_IM_vircontig_756	3182	Uncultured organism clone VC1D056TF genomic sequence	0	88.05	912	No	7.2498
APC_IM_vircontig_757	3182	Torque teno midi virus DNA, complete genome, isolate: MDJN1	0	81.4	3123	No	3.17711
APC_IM_vircontig_758	3178	No hit	No hit	No hit	No hit	No	5.2388
APC_IM_vircontig_759	3163	No hit	No hit	No hit	No hit	No	3.57818
APC_IM_vircontig_76	31805	Ruminococcus bicirculans chromosome II, complete genome	0	91.53	2657	No	3
APC_IM_vircontig_760	3162	No hit	No hit	No hit	No hit	No	4.7654
APC_IM_vircontig_761	3131	Lactococcus phage 936 group phage Phi44, complete genome	0	94.32	1513	No	3.50409
APC_IM_vircontig_762	3131	TT virus DNA for ORF2, partial cds, isolate:HIJ/2-4E	0	95.86	459	No	3.02366
APC_IM_vircontig_763	3129	Klebsiella pneumoniae strain DHQP1605752_NV chromosome, complete genome	0	80.72	949	No	48.4936
APC_IM_vircontig_764	3128	No hit	No hit	No hit	No hit	No	3.165
APC_IM_vircontig_765	3127	Veillonella parvula strain UTDB1-3, complete genome	8e-56	77.98	377	No	2.866
APC_IM_vircontig_766	3124	Torque teno virus isolate P1-2 ORF1 gene, complete cds	9e-85	85.23	325	No	5.7361
APC_IM_vircontig_767	3123	No hit	No hit	No hit	No hit	No	107.337
APC_IM_vircontig_768	3112	No hit	No hit	No hit	No hit	No	16.413
APC_IM_vircontig_769	3105	Lactococcus lactis phage 645, complete genome	0	99.25	2938	No	5.33608
APC_IM_vircontig_77	31058	Bacillus subtilis strain DKU_NT_01 genome	0	85.85	6070	No	3.0989
APC_IM_vircontig_770	3104	No hit	No hit	No hit	No hit	No	2.76282
APC_IM_vircontig_771	3104	No hit	No hit	No hit	No hit	No	3.59945
APC_IM_vircontig_772	3103	No hit	No hit	No hit	No hit	No	3.57745
APC_IM_vircontig_773	3102	Lactococcus phage CaseusJM1, complete genome	0	94.05	3109	No	2.55229
APC_IM_vircontig_774	3099	No hit	No hit	No hit	No hit	No	16.4182
APC_IM_vircontig_775	3093	Clostridiales sp. SS3/4 draft genome	0	94.26	1219	No	1.94388
APC_IM_vircontig_776	3093	Blautia hansenii DSM 20583, complete genome	0	79.76	2406	No	3.24885
APC_IM_vircontig_777	3091	No hit	No hit	No hit	No hit	No	3.2214
APC_IM_vircontig_778	3087	Faecalibacterium prausnitzii strain A2165 chromosome, complete genome	0	98.42	2535	No	7.0983
APC_IM_vircontig_779	3081	Cutibacterium acnes strain KCOM 1861 (= ChDC B594) chromosome, complete genome	0	99.3	1849	No	2.79132
APC_IM_vircontig_78	31006	No hit	No hit	No hit	No hit	No	3.4658
APC_IM_vircontig_780	3077	TTV-like mini virus isolate Emory2, complete genome	3e-100	88.71	319	No	2.85213
APC_IM_vircontig_781	3077	Torque teno mini virus ALA22, complete genome	1e-122	90.91	341	No	1.9353
APC_IM_vircontig_782	3070	Torque teno mini virus 7 DNA, complete genome, isolate: TLMV-CLC156	2e-82	84.43	334	No	2.79425
APC_IM_vircontig_783	3070	Flavonifractor plautii strain YL31, complete genome	1e-18	93.24	74	No	9.0335
APC_IM_vircontig_784	3068	No hit	No hit	No hit	No hit	No	2.51577
APC_IM_vircontig_785	3066	Candidatus Saccharibacteria bacterium RAAC3_TM7_1, complete genome	2e-26	81.21	165	No	2.18663
APC_IM_vircontig_786	3065	TTV-like mini virus isolate Emory2, complete genome	9e-110	86.81	379	No	3.80669
APC_IM_vircontig_787	3062	No hit	No hit	No hit	No hit	No	2.58271
APC_IM_vircontig_788	3059	Ruminococcus torques L2-14 draft genome	0	99.54	3059	No	3.49674
APC_IM_vircontig_789	3059	TTV-like mini virus complete genome, isolate:TLMV-CLC062	1e-93	87.15	319	No	3.39983
APC_IM_vircontig_79	30998	No hit	No hit	No hit	No hit	No	4.5771
APC_IM_vircontig_790	3052	Lactococcus phage fd13, complete genome	0	88.69	1892	No	3.28758
APC_IM_vircontig_791	3051	Clostridium saccharolyticum-like K10 draft genome	0	99.65	1415	No	76.8908
APC_IM_vircontig_792	3049	TTV-like mini virus isolate TTMV-204, complete genome	5e-147	89.44	426	No	24.6119
APC_IM_vircontig_793	3048	Haemophilus influenzae F3047 complete genome	0	82.37	1446	No	3.30748
APC_IM_vircontig_794	3047	TTV-like mini virus isolate LIL-y3 ORF2, ORF1, ORF3, and ORF4 genes, complete cds	4e-138	74.87	1190	No	2.96632
APC_IM_vircontig_795	3045	No hit	No hit	No hit	No hit	No	5.8135
APC_IM_vircontig_796	3045	No hit	No hit	No hit	No hit	No	3.76945
APC_IM_vircontig_797	3043	Candidatus Saccharibacteria oral taxon TM7x, complete genome	6e-166	80.86	768	No	3.52765
APC_IM_vircontig_798	3042	Candidatus Saccharibacteria oral taxon TM7x, complete genome	0	83.79	2998	No	3.26617
APC_IM_vircontig_799	3037	No hit	No hit	No hit	No hit	No	6.99625
APC_IM_vircontig_8	72262	No hit	No hit	No hit	No hit	No	6.46948
APC_IM_vircontig_80	30977	Uncultured bacterium clone HA0AAA21ZC10FM1 genomic sequence	0	99.85	656	No	3.94554
APC_IM_vircontig_800	3033	TTV-like mini virus isolate TTMV-204, complete genome	7e-106	91.16	294	No	5.2884
APC_IM_vircontig_801	3033	Torque teno mini virus 9 DNA, complete genome, isolate: TLMV-NLC030	2e-76	84.81	316	No	2.53246
APC_IM_vircontig_802	3033	No hit	No hit	No hit	No hit	No	2.47413
APC_IM_vircontig_803	3032	Bacteroides caccae strain ATCC 43185, complete genome	0	79.56	1761	No	5.5622
APC_IM_vircontig_804	3025	Faecalibacterium prausnitzii L2/6 draft genome	0	91.25	1475	No	4.47
APC_IM_vircontig_805	3017	Uncultured organism clone VC1BY71TR genomic sequence	4e-19	98.39	62	No	3.08765
APC_IM_vircontig_806	3007	TTV-like mini virus isolate Emory2, complete genome	7e-61	81.96	316	No	2.53911
APC_IM_vircontig_807	3005	Enterococcus faecalis str. Symbioflor 1, complete genome	0	97.97	2222	No	2.00283
APC_IM_vircontig_808	3003	Microviridae IME-16, complete sequence	0	86.21	2299	No	3.85377
APC_IM_vircontig_809	3000	Bacillus thuringiensis strain CTC plasmid, complete sequence	0	87.77	3009	No	2.11604
APC_IM_vircontig_81	30507	No hit	No hit	No hit	No hit	No	1.87819
APC_IM_vircontig_810	2989	TTV-like mini virus isolate TTMV-204, complete genome	2e-116	86.67	405	No	1.87347
APC_IM_vircontig_811	2986	Torque teno mini virus 8 isolate PB4TL, complete genome	3e-65	91.33	196	No	6.4785
APC_IM_vircontig_812	2984	TTV-like mini virus isolate TTMV-204, complete genome	5e-97	84.5	387	No	3.00851
APC_IM_vircontig_813	2984	TTV-like mini virus isolate TTMV-204, complete genome	7e-126	87.38	420	No	4.26017
APC_IM_vircontig_814	2983	Human feces pecovirus strain PeCV-NI, complete genome	0	97.99	2536	No	55.7188
APC_IM_vircontig_815	2980	TT virus sle1889 intragenomic rearrangement	9e-120	89.04	365	No	7.8821
APC_IM_vircontig_816	2971	No hit	No hit	No hit	No hit	No	5.3915
APC_IM_vircontig_817	2969	No hit	No hit	No hit	No hit	No	3.9981
APC_IM_vircontig_818	2968	Torque teno virus isolate P13-3 ORF1 gene, complete cds	0	90.57	509	No	15.661
APC_IM_vircontig_819	2968	Torque teno virus isolate P1-2 ORF1 gene, complete cds	2e-85	84.84	343	No	1.78822
APC_IM_vircontig_82	30399	No hit	No hit	No hit	No hit	No	3.66255
APC_IM_vircontig_820	2966	Lactococcus phage 936 group phage PhiL.6, complete genome	0	94.47	2081	No	3.12262
APC_IM_vircontig_821	2965	Parabacteroides distasonis ATCC 8503, complete genome	0	99.52	2945	No	2.69392
APC_IM_vircontig_822	2964	No hit	No hit	No hit	No hit	No	2.64639
APC_IM_vircontig_823	2963	TTV-like mini virus isolate Emory2, complete genome	4e-118	89.3	355	No	2.93625
APC_IM_vircontig_824	2962	Escherichia coli strain ECONIH2, complete genome	0	90.08	1431	No	2.91151
APC_IM_vircontig_825	2962	Lactococcus phage R31, complete genome	0	92.56	1936	No	2.2569
APC_IM_vircontig_826	2958	TTV-like mini virus isolate Emory2, complete genome	9e-105	87.08	356	No	7.4846
APC_IM_vircontig_827	2958	Lactobacillus oris strain J-1, complete genome	0	81.6	2967	No	2.72952
APC_IM_vircontig_828	2952	Faecalibacterium prausnitzii L2/6 draft genome	0	97.97	2952	No	2.55333
APC_IM_vircontig_829	2948	TTV-like mini virus isolate Emory2, complete genome	4e-98	86.24	356	No	2.22381
APC_IM_vircontig_83	30386	Enterococcus faecium NRRL B-2354, complete genome	0	95.34	5497	No	13.7204
APC_IM_vircontig_830	2948	Torque teno virus isolate P15-2 ORF1 gene, complete cds	0	93.27	2956	No	2.17636
APC_IM_vircontig_831	2944	Lactococcus phage 936 group phage Phi5.12, complete genome	0	89.4	1368	No	1.95043
APC_IM_vircontig_832	2939	No hit	No hit	No hit	No hit	No	2.17001
APC_IM_vircontig_833	2938	No hit	No hit	No hit	No hit	No	3.78394
APC_IM_vircontig_834	2938	No hit	No hit	No hit	No hit	No	1.69025
APC_IM_vircontig_835	2937	No hit	No hit	No hit	No hit	No	1.39617
APC_IM_vircontig_836	2937	TTV-like mini virus isolate Emory2, complete genome	1e-102	86.76	355	No	2.19828
APC_IM_vircontig_837	2934	Torque teno virus isolate P1-2 ORF1 gene, complete cds	3e-65	80.6	366	No	78.9741
APC_IM_vircontig_838	2933	No hit	No hit	No hit	No hit	No	3.2805
APC_IM_vircontig_839	2930	Clostridiales sp. SS3/4 draft genome	0	88.03	2064	No	1.70413
APC_IM_vircontig_84	30111	Bifidobacterium longum strain Su859 genome assembly, chromosome: I	0	90.25	882	Yes	11.6442
APC_IM_vircontig_840	2927	Shigella flexneri 5 str. 8401, complete genome	0	96.88	2276	No	32.1306
APC_IM_vircontig_841	2927	No hit	No hit	No hit	No hit	No	3.84023
APC_IM_vircontig_842	2925	Torque teno mini virus 5 DNA, complete genome, isolate: TGP96	4e-83	89.27	261	No	4.7879
APC_IM_vircontig_843	2920	No hit	No hit	No hit	No hit	No	1.90944
APC_IM_vircontig_844	2917	TTV-like mini virus isolate LIL-y3 ORF2, ORF1, ORF3, and ORF4 genes, complete cds	9e-100	72.85	1197	No	2.35487
APC_IM_vircontig_845	2914	Torque teno mini virus 9 DNA, complete genome, isolate: TLMV-NLC030	3e-104	89.49	314	No	3.12066
APC_IM_vircontig_846	2911	Torque teno virus isolate P13-4 ORF1 gene, partial cds	1e-103	87.14	350	No	1.72657
APC_IM_vircontig_847	2909	Torque teno midi virus DNA, complete genome, isolate: MDJN51	0	90.98	632	No	4.233
APC_IM_vircontig_848	2908	TTV-like mini virus isolate TTMV_LY3, complete genome	0	81.29	1304	No	2.23888
APC_IM_vircontig_849	2908	No hit	No hit	No hit	No hit	No	3.9486
APC_IM_vircontig_85	29901	Oscillibacter valericigenes Sjm18-20 DNA, complete genome	6e-06	80	100	No	3.21491
APC_IM_vircontig_850	2904	Ruminococcus bicirculans chromosome II, complete genome	0	72.37	2935	No	3.00968
APC_IM_vircontig_851	2898	Faecalibacterium prausnitzii SL3/3 draft genome	0	94.56	2847	No	52.9743
APC_IM_vircontig_852	2898	Torque teno virus isolate P13-3 ORF1 gene, complete cds	2e-131	84.01	519	No	3.86919
APC_IM_vircontig_853	2897	TTV-like mini virus isolate TTMV-204, complete genome	1e-103	84.32	421	No	2.45736
APC_IM_vircontig_854	2897	Torque teno virus isolate P13-4 ORF1 gene, partial cds	3e-139	90.89	384	No	8.05626
APC_IM_vircontig_855	2895	TTV-like mini virus isolate F1TL1 ORF1 gene, partial cds	2e-151	95.89	341	No	3.22308
APC_IM_vircontig_856	2891	Candidatus Saccharibacteria bacterium RAAC3_TM7_1, complete genome	1e-23	94.94	79	No	18.9747
APC_IM_vircontig_857	2891	Torque teno virus isolate P1-2 ORF1 gene, complete cds	9e-80	83.92	342	No	3.06025
APC_IM_vircontig_858	2886	TTV-like mini virus isolate Emory2, complete genome	3e-30	75.63	357	No	7.5005
APC_IM_vircontig_859	2883	Uncultured organism clone VC1D570TR genomic sequence	0	96.37	441	No	3.6103
APC_IM_vircontig_86	29513	Clostridiales sp. SM4/1 draft genome	3e-78	78.4	486	No	20.3038
APC_IM_vircontig_860	2878	TTV-like mini virus isolate TTMV-204, complete genome	7e-96	89.23	297	No	4.32456
APC_IM_vircontig_861	2875	Romboutsia ilealis strain CRIB genome assembly, chromosome: chr1	0	90.55	899	No	1.70078
APC_IM_vircontig_862	2875	TTV-like mini virus isolate LIL-y4 ORF2 and ORF1 genes, complete cds	1e-93	84.74	380	No	6.45659
APC_IM_vircontig_863	2865	Veillonella parvula strain UTDB1-3, complete genome	0	91.53	2184	No	4.60683
APC_IM_vircontig_864	2858	Torque teno mini virus ALA22, complete genome	8e-140	93.39	348	No	3.33854
APC_IM_vircontig_865	2855	Lactococcus phage 936 group phage PhiJF1, complete genome	0	94.49	1542	No	1.70537
APC_IM_vircontig_866	2854	Lactococcus phage 936 group phage Phi19, complete genome	0	89.21	2140	No	4.50293
APC_IM_vircontig_867	2853	TTV-like mini virus isolate LIL-y1 ORF2, ORF1, ORF3, and ORF4 genes, complete cds	8e-165	75.95	1235	No	3.69922
APC_IM_vircontig_868	2851	No hit	No hit	No hit	No hit	No	2.98143
APC_IM_vircontig_869	2847	No hit	No hit	No hit	No hit	No	2.7955
APC_IM_vircontig_87	29480	Bifidobacterium longum subsp. infantis genome assembly Bifidobacterium longum subsp. infantis CECT7210, chromosome : I	0	96.21	6234	No	3.23115
APC_IM_vircontig_870	2844	Enterococcus faecalis str. Symbioflor 1, complete genome	0	76.62	1463	No	4.52255
APC_IM_vircontig_871	2837	TTV-like mini virus isolate TTMV_LY3, complete genome	1e-87	91.2	250	No	3.90481
APC_IM_vircontig_872	2823	TTV-like mini virus isolate Emory2, complete genome	1e-92	86.4	331	No	3.23651
APC_IM_vircontig_873	2816	No hit	No hit	No hit	No hit	No	2.51717
APC_IM_vircontig_874	2801	TTV-like mini virus isolate Emory1, complete genome	2e-85	88.03	284	No	2.30815
APC_IM_vircontig_875	2801	Bovine faeces associated smacovirus 2 isolate 23_Fec30587_cow, complete sequence	2e-21	83.87	124	No	3.00589
APC_IM_vircontig_876	2799	Lactococcus phage 936 group phage Phi109, complete genome	0	89.26	2811	No	5.589
APC_IM_vircontig_877	2798	Uncultured virus contig196 genomic sequence	4e-113	74.11	1178	No	2.99606
APC_IM_vircontig_878	2795	TTV-like mini virus isolate Emory2, complete genome	1e-108	89.94	318	No	2.19094
APC_IM_vircontig_879	2794	Klebsiella oxytoca DNA, complete genome, strain: JKo3	0	98.71	2794	No	21.5178
APC_IM_vircontig_88	29445	Bifidobacterium longum subsp. longum strain AH1206, complete genome	0	98.64	6557	No	2.83629
APC_IM_vircontig_880	2793	Faecalibacterium prausnitzii strain A2165 chromosome, complete genome	0	97.49	716	No	2.33235
APC_IM_vircontig_881	2788	No hit	No hit	No hit	No hit	No	12.0449
APC_IM_vircontig_882	2783	No hit	No hit	No hit	No hit	No	77.1145
APC_IM_vircontig_883	2780	Bifidobacterium kashiwanohense PV20-2, complete genome	0	80.64	1276	No	3.35242
APC_IM_vircontig_884	2779	Torque teno mini virus 5 DNA, complete genome, isolate: TGP96	9e-45	78.5	321	No	15.0553
APC_IM_vircontig_885	2771	No hit	No hit	No hit	No hit	No	29.9268
APC_IM_vircontig_886	2769	No hit	No hit	No hit	No hit	No	1.8495
APC_IM_vircontig_887	2768	No hit	No hit	No hit	No hit	No	5.0432
APC_IM_vircontig_888	2763	No hit	No hit	No hit	No hit	No	4.86806
APC_IM_vircontig_889	2761	No hit	No hit	No hit	No hit	No	3.37798
APC_IM_vircontig_89	29142	No hit	No hit	No hit	No hit	No	2.96429
APC_IM_vircontig_890	2756	No hit	No hit	No hit	No hit	No	2.50694
APC_IM_vircontig_891	2753	Enterococcus faecalis 62, complete genome	0	90.14	2191	No	3.44389
APC_IM_vircontig_892	2750	Bifidobacterium adolescentis strain 22L, complete genome	0	87.64	1400	No	4.21592
APC_IM_vircontig_893	2743	No hit	No hit	No hit	No hit	No	4.09055
APC_IM_vircontig_894	2740	Torque teno midi virus DNA, complete genome, isolate: MDJN1	0	80.37	968	No	3.52736
APC_IM_vircontig_895	2739	Candidatus Saccharibacteria oral taxon TM7x, complete genome	0	88.12	2736	No	10.4877
APC_IM_vircontig_896	2737	Torque teno mini virus ALA22, complete genome	8e-70	95.98	174	No	3.57271
APC_IM_vircontig_897	2722	Torque teno mini virus 5 DNA, complete genome, isolate: TGP96	1e-62	96.73	153	No	3.48606
APC_IM_vircontig_898	2716	Torque teno mini virus ALA22, complete genome	6e-116	89.97	339	No	2.07171
APC_IM_vircontig_899	2712	No hit	No hit	No hit	No hit	No	6.7554
APC_IM_vircontig_9	71623	Clostridioides difficile strain 08ACD0030 chromosome, complete genome	0	95.91	1564	No	3.40977
APC_IM_vircontig_90	28927	No hit	No hit	No hit	No hit	No	3.34232
APC_IM_vircontig_900	2712	Flavonifractor plautii strain YL31, complete genome	9e-35	78.08	260	No	3.26547
APC_IM_vircontig_901	2709	No hit	No hit	No hit	No hit	No	8.0227
APC_IM_vircontig_902	2708	TTV-like mini virus isolate TTMV-204, complete genome	1e-77	85.16	310	No	6.39161
APC_IM_vircontig_903	2706	No hit	No hit	No hit	No hit	No	2.19622
APC_IM_vircontig_904	2701	No hit	No hit	No hit	No hit	No	3.693
APC_IM_vircontig_905	2691	No hit	No hit	No hit	No hit	No	11.6256
APC_IM_vircontig_906	2690	Blautia hansenii DSM 20583, complete genome	0	82.26	840	No	5.0133
APC_IM_vircontig_907	2689	Torque teno mini virus 1 DNA, complete genome, isolate: TLMV-CBD279	0	76.9	2545	No	5.14128
APC_IM_vircontig_908	2689	Escherichia coli UMNK88, complete genome	0	97.65	2042	No	2.80561
APC_IM_vircontig_909	2686	Faecalibacterium prausnitzii L2/6 draft genome	0	98.3	2061	No	2.56814
APC_IM_vircontig_91	28904	Clostridiales sp. SM4/1 draft genome	0	78.52	1913	No	2.38176
APC_IM_vircontig_910	2683	Torque teno mini virus 5 DNA, complete genome, isolate: TGP96	1e-68	97.52	161	No	2.31363
APC_IM_vircontig_911	2682	No hit	No hit	No hit	No hit	No	6.7236
APC_IM_vircontig_912	2680	No hit	No hit	No hit	No hit	No	409.271
APC_IM_vircontig_913	2678	No hit	No hit	No hit	No hit	No	11.8686
APC_IM_vircontig_914	2674	Clostridium botulinum 202F, complete genome	3e-164	78.8	953	No	2.35707
APC_IM_vircontig_915	2670	TTV-like mini virus isolate TTMV_LY1, complete genome	6e-61	94.44	162	No	9.2331
APC_IM_vircontig_916	2666	Torque teno mini virus 5 DNA, complete genome, isolate: TGP96	8e-70	98.11	159	No	2.91859
APC_IM_vircontig_917	2664	Leuconostoc phage phiLNTR3, complete genome	0	95.35	1700	No	2.51658
APC_IM_vircontig_918	2662	TTV-like mini virus isolate LIL-y1 ORF2, ORF1, ORF3, and ORF4 genes, complete cds	6e-61	81.59	315	No	5.69819
APC_IM_vircontig_919	2661	Torque teno mini virus 5 DNA, complete genome, isolate: TGP96	0	78.83	1200	No	4.167
APC_IM_vircontig_92	28781	Bifidobacterium longum subsp. infantis ATCC 15697 = JCM 1222 = DSM 20088 DNA, complete genome	0	94.1	7168	No	3.42555
APC_IM_vircontig_920	2654	Escherichia coli W, complete genome	0	93.62	2664	No	2.98491
APC_IM_vircontig_921	2653	TT virus sle1841 intragenomic rearrangement	1e-32	92.59	108	No	2.88229
APC_IM_vircontig_922	2652	No hit	No hit	No hit	No hit	No	9.605
APC_IM_vircontig_923	2650	Bifidobacterium phage Bbif-1, complete sequence	0	91.84	2586	No	3.97782
APC_IM_vircontig_924	2642	TTV-like mini virus isolate ITVPI-1562/0, untranslated region	4e-83	87.54	281	No	2.6875
APC_IM_vircontig_925	2641	Enterobacter asburiae strain ATCC 35953, complete sequence	0	89.3	2655	No	1.83669
APC_IM_vircontig_926	2636	No hit	No hit	No hit	No hit	No	5.191
APC_IM_vircontig_927	2626	Lactococcus Phage ASCC544, complete genome	0	90.49	2630	No	3.30373
APC_IM_vircontig_928	2626	Lactococcus phage 936 group phage Phi43, complete genome	0	90.18	2637	No	2.97881
APC_IM_vircontig_929	2622	No hit	No hit	No hit	No hit	No	5.4493
APC_IM_vircontig_93	28490	Clostridium saccharobutylicum strain NCP 195, complete genome	6e-06	91.84	49	No	2.22424
APC_IM_vircontig_930	2619	No hit	No hit	No hit	No hit	No	2.02326
APC_IM_vircontig_931	2618	No hit	No hit	No hit	No hit	No	2.39676
APC_IM_vircontig_932	2614	No hit	No hit	No hit	No hit	No	1.53644
APC_IM_vircontig_933	2608	Lactobacillus ruminis ATCC 27782, complete genome	0	90.53	1310	No	6.49949
APC_IM_vircontig_934	2607	No hit	No hit	No hit	No hit	No	2.17528
APC_IM_vircontig_935	2606	Torque teno mini virus 7 DNA, complete genome, isolate: TLMV-CLC156	1e-162	72.54	2156	No	1.77508
APC_IM_vircontig_936	2593	Anaerostipes hadrus draft genome	0	100	2593	No	3.41379
APC_IM_vircontig_937	2591	No hit	No hit	No hit	No hit	No	3.05172
APC_IM_vircontig_938	2586	No hit	No hit	No hit	No hit	No	6.976
APC_IM_vircontig_939	2586	Dehalococcoides mccartyi strain KBTCE1, complete genome	2e-11	91.67	60	No	6.9365
APC_IM_vircontig_94	28454	Veillonella rodentium strain NCTC12018 genome assembly, chromosome: 1	0	80.9	2675	No	2.94411
APC_IM_vircontig_940	2585	IAS virus, complete genome	0	82.52	1161	No	3.56415
APC_IM_vircontig_941	2585	Torque teno mini virus 6 DNA, complete genome, isolate: TLMV-CBD203	3e-104	73.73	1180	No	3.3666
APC_IM_vircontig_942	2584	Lactococcus phage 936 group phage PhiM.5, complete genome	0	93	1029	No	5.8679
APC_IM_vircontig_943	2584	Uncultured virus contig195 genomic sequence	0	78.92	2377	No	3.07645
APC_IM_vircontig_944	2581	TTV-like mini virus complete genome, isolate:TLMV-CLC205	6e-76	74.32	806	No	9.86
APC_IM_vircontig_945	2578	No hit	No hit	No hit	No hit	No	2.66088
APC_IM_vircontig_946	2566	Lactococcus phage fd13, complete genome	0	88.02	2588	No	3.14315
APC_IM_vircontig_947	2565	Faecalibacterium prausnitzii L2/6 draft genome	0	96.64	1907	No	2.57873
APC_IM_vircontig_948	2563	No hit	No hit	No hit	No hit	No	2.89969
APC_IM_vircontig_949	2555	Lactococcus phage 936 group phage PhiJF1, complete genome	0	94.99	2513	No	1.92631
APC_IM_vircontig_95	28234	Bifidobacterium longum subsp. infantis genome assembly Bifidobacterium longum subsp. infantis CECT7210, chromosome : I	0	95.69	5725	No	3.12295
APC_IM_vircontig_950	2554	Torque teno midi virus DNA, complete genome, isolate: MDJN52	0	77.13	1207	No	1.47029
APC_IM_vircontig_951	2553	No hit	No hit	No hit	No hit	No	1.92718
APC_IM_vircontig_952	2553	No hit	No hit	No hit	No hit	No	7.4903
APC_IM_vircontig_953	2552	Uncultured virus contig196 genomic sequence	3e-109	90.68	311	No	2.39877
APC_IM_vircontig_954	2549	Torque teno midi virus DNA, complete genome, isolate: MDJN69	2e-50	79.43	316	No	4.7286
APC_IM_vircontig_955	2543	No hit	No hit	No hit	No hit	No	2.76235
APC_IM_vircontig_956	2539	Coprococcus catus GD/7 draft genome	0	99.68	2539	No	3.8393
APC_IM_vircontig_957	2535	Lactococcus phage M6654, complete genome	0	87.96	2043	No	5.2064
APC_IM_vircontig_958	2533	No hit	No hit	No hit	No hit	No	8.4815
APC_IM_vircontig_959	2531	No hit	No hit	No hit	No hit	No	2.64706
APC_IM_vircontig_96	28168	No hit	No hit	No hit	No hit	No	6.2451
APC_IM_vircontig_960	2528	Bifidobacterium longum subsp. infantis genome assembly Bifidobacterium longum subsp. infantis CECT7210, chromosome : I	6e-111	84.33	434	No	2.6491
APC_IM_vircontig_961	2520	No hit	No hit	No hit	No hit	No	5.6305
APC_IM_vircontig_962	2513	Torque teno virus isolate P13-4 ORF1 gene, partial cds	0	76.28	1349	No	3.10962
APC_IM_vircontig_963	2506	Lactococcus phage 936 group phage PhiC0139, complete genome	0	89.92	2500	No	2.90486
APC_IM_vircontig_964	2503	Torque teno mini virus 18 isolate 222, complete genome	4e-38	89.78	137	No	2.70217
APC_IM_vircontig_965	2502	Torque teno midi virus DNA, complete genome, isolate: MDJN47	2e-165	76.56	1156	No	2.01034
APC_IM_vircontig_966	2502	No hit	No hit	No hit	No hit	No	3.91304
APC_IM_vircontig_967	2495	No hit	No hit	No hit	No hit	No	5.7806
APC_IM_vircontig_968	2494	TTV-like mini virus isolate TTMV_LY2, complete genome	6e-21	76.92	234	No	2.12332
APC_IM_vircontig_969	2491	Torque teno midi virus DNA, complete genome, isolate: MDJN1	1e-63	76.06	564	No	9.0098
APC_IM_vircontig_97	27658	No hit	No hit	No hit	No hit	No	4.09959
APC_IM_vircontig_970	2488	Torque teno mini virus 3 DNA, complete genome, isolate: TLMV-NLC026	4e-18	82.4	125	No	3.8112
APC_IM_vircontig_971	2487	Lactococcus phage fd13, complete genome	0	92.86	2156	No	3.53167
APC_IM_vircontig_972	2486	TTV-like mini virus isolate TTMV_LY3, complete genome	5e-22	93.75	80	No	2.8264
[truncated: 29 more rows]
