# Supplementary material for: Viromes of one year old infants reveal the impact of birth mode on microbiome diversity
Source: PeerJ. 2018 May 7;6:e4694. doi: 10.7717/peerj.4694 (PMC5944432; doi:10.7717/peerj.4694)
Supplement: Table S5 — Positive log fold changes represent an increase in C-section relative to SVD. The column padj corresponds to the p value adjusted for multiple testing. [file peerj-06-4694-s005.xlsx]

## Sheet: Sheet1
	baseMean	log2FoldChange	lfcSE	stat	pvalue	padj
APC_IM_vircontig_1	2.47639	-3.44032	1.73511	-1.98277	0.0473933	0.180651		Positive log fold changes represent an increase in C-section relative to SVD
APC_IM_vircontig_4	52153.3	3.03074	1.77744	1.70512	0.0881723	0.241389
APC_IM_vircontig_10	2.41932	4.60041	1.67148	2.7523	0.00591788	0.0541007		Negative log fold changes represent an increase in SVD relative to C-Section
APC_IM_vircontig_12	61.2622	-8.17793	2.14141	-3.81894	0.000134027	0.00879214
APC_IM_vircontig_14	6.57226	-0.768554	1.96559	-0.391005	0.695794	0.755696
APC_IM_vircontig_15	16.4241	-0.824915	2.04469	-0.403441	0.686623	0.748214
APC_IM_vircontig_16	984.37	-5.97731	1.87463	-3.18852	0.00143001	0.0360803
APC_IM_vircontig_17	14.2508	-4.41778	1.66405	-2.65484	0.00793453	0.0679288
APC_IM_vircontig_18	4.87983	-5.01581	1.9635	-2.55452	0.0106333	0.0775051
APC_IM_vircontig_19	1.90044	-3.29135	2.20678	-1.49147	0.135837	0.299024
APC_IM_vircontig_20	53.7675	-5.26011	1.62759	-3.23184	0.00122997	0.0356458
APC_IM_vircontig_21	4.47958	2.02089	2.23297	0.905024	0.365453	0.490302
APC_IM_vircontig_23	2.52888	-1.35468	1.45206	-0.932933	0.350854	0.485571
APC_IM_vircontig_24	9.67222	-6.11448	2.16716	-2.82142	0.00478109	0.0494704
APC_IM_vircontig_27	10.094	1.8384	2.12055	0.866946	0.385971	0.500787
APC_IM_vircontig_31	3.16757	2.48448	1.57468	1.57776	0.11462	0.279339
APC_IM_vircontig_34	3.86489	-1.62492	1.89384	-0.858001	0.390892	0.502492
APC_IM_vircontig_35	13.9119	-5.1999	1.81268	-2.86863	0.00412252	0.0483644
APC_IM_vircontig_36	1.65392	-3.4412	2.36862	-1.45283	0.146271	0.308121
APC_IM_vircontig_38	7.63494	-2.32236	1.63399	-1.42128	0.155236	0.314306
APC_IM_vircontig_40	5.45205	-0.356398	1.45011	-0.245773	0.805858	0.833822
APC_IM_vircontig_42	4.85325	-2.27788	1.55774	-1.4623	0.143659	0.307975
APC_IM_vircontig_44	6.82143	-1.54673	1.68233	-0.919395	0.357889	0.487086
APC_IM_vircontig_46	8.09906	-0.337313	1.28128	-0.263263	0.792348	0.827676
APC_IM_vircontig_49	8.747	-1.11236	1.53313	-0.725544	0.468119	0.577229
APC_IM_vircontig_51	6.09121	-4.81585	1.88282	-2.55778	0.0105342	0.0775051
APC_IM_vircontig_54	10.1116	-3.43665	1.47282	-2.33338	0.0196281	0.111
APC_IM_vircontig_60	28.3783	-4.34202	1.57823	-2.75119	0.00593788	0.0541007
APC_IM_vircontig_64	7.70017	-2.80199	1.47527	-1.89931	0.0575232	0.197783
APC_IM_vircontig_65	11.7408	-2.11112	2.29212	-0.921034	0.357033	0.487086
APC_IM_vircontig_66	3.38134	1.36495	1.65411	0.825192	0.409263	0.518294
APC_IM_vircontig_74	5.87877	-5.39943	1.96929	-2.74181	0.0061102	0.0541661
APC_IM_vircontig_75	2.05714	-3.10263	2.30132	-1.34819	0.177596	0.32891
APC_IM_vircontig_76	3.86573	-3.76685	2.28834	-1.64611	0.099741	0.255586
APC_IM_vircontig_85	2.25831	5.74614	2.37157	2.42292	0.0153962	0.0977714
APC_IM_vircontig_87	45.2847	-6.47167	1.65395	-3.91285	9.12123e-05	0.00747941
APC_IM_vircontig_88	449.141	-8.09561	1.89991	-4.26104	2.03474e-05	0.00667394
APC_IM_vircontig_89	16.6673	-6.90681	1.84139	-3.75087	0.000176223	0.00963352
APC_IM_vircontig_91	13.9453	-0.10843	1.87862	-0.0577182	0.953973	0.953973
APC_IM_vircontig_92	52.3887	-5.60707	1.63404	-3.43141	0.000600455	0.0241812
APC_IM_vircontig_95	106.944	-4.45519	1.7755	-2.50927	0.0120982	0.0831151
APC_IM_vircontig_98	3.28875	0.328676	1.76596	0.186118	0.852352	0.871159
APC_IM_vircontig_100	2.77188	3.69784	1.95792	1.88866	0.0589375	0.198128
APC_IM_vircontig_102	6.66434	-1.7427	1.78983	-0.973667	0.330222	0.463245
APC_IM_vircontig_105	14.2033	-4.18605	1.81314	-2.30873	0.0209588	0.112835
APC_IM_vircontig_106	17.8607	-1.82536	1.43608	-1.27107	0.203705	0.350173
APC_IM_vircontig_107	11.6803	-2.97697	1.92181	-1.54904	0.121372	0.286402
APC_IM_vircontig_111	26.1153	-6.02476	2.0221	-2.97946	0.0028876	0.0430515
APC_IM_vircontig_112	1.71373	-2.49827	2.3202	-1.07675	0.281594	0.419831
APC_IM_vircontig_113	1.49973	-0.665931	2.3519	-0.283146	0.777065	0.816884
APC_IM_vircontig_116	1.48208	-1.48707	1.69905	-0.875236	0.381445	0.500456
APC_IM_vircontig_119	4.046	-4.40766	2.15631	-2.04408	0.0409459	0.167878
APC_IM_vircontig_122	24.9139	-4.08431	1.54192	-2.64884	0.0080769	0.0679288
APC_IM_vircontig_123	37.2841	-1.30196	1.2309	-1.05773	0.290176	0.430402
APC_IM_vircontig_125	37.1953	-1.95062	1.95224	-0.99917	0.317712	0.455064
APC_IM_vircontig_126	10.2529	-1.99542	1.50028	-1.33003	0.183508	0.32891
APC_IM_vircontig_128	3.03279	0.95698	1.9142	0.499937	0.617119	0.690836
APC_IM_vircontig_129	5.87245	-1.52014	2.06088	-0.737615	0.460749	0.570285
APC_IM_vircontig_131	5.84386	0.167157	1.55444	0.107535	0.914364	0.925653
APC_IM_vircontig_132	22.0019	-0.459669	1.64205	-0.279936	0.779526	0.816884
APC_IM_vircontig_136	2.90576	-0.796133	1.91769	-0.415152	0.678031	0.741313
APC_IM_vircontig_138	3.30279	-2.54167	2.31447	-1.09817	0.272131	0.409445
APC_IM_vircontig_142	28.9288	-5.02406	1.66291	-3.02125	0.0025173	0.0430515
APC_IM_vircontig_143	7.73976	1.75352	1.54545	1.13464	0.256528	0.401
APC_IM_vircontig_149	2.00449	-1.245	1.9161	-0.649761	0.515847	0.615265
APC_IM_vircontig_153	2.47091	-4.25593	2.36907	-1.79645	0.0724224	0.220656
APC_IM_vircontig_158	21.801	-1.7953	1.72528	-1.04058	0.29807	0.43799
APC_IM_vircontig_159	69.2604	-7.80494	2.31234	-3.37534	0.000737233	0.0241812
APC_IM_vircontig_162	1.90708	-3.68784	2.36848	-1.55705	0.11946	0.28399
APC_IM_vircontig_163	8.76478	1.31212	1.60527	0.817382	0.41371	0.519912
APC_IM_vircontig_165	2.77749	-3.12342	2.00612	-1.55694	0.119484	0.28399
APC_IM_vircontig_166	21.0973	-5.9883	1.71629	-3.48909	0.000484667	0.0227101
APC_IM_vircontig_173	6.14569	-3.11125	1.97385	-1.57623	0.114972	0.279339
APC_IM_vircontig_174	101.083	-3.57862	2.15668	-1.65932	0.0970504	0.25065
APC_IM_vircontig_176	2.24727	0.95296	1.70103	0.560224	0.575326	0.660116
APC_IM_vircontig_179	4.13746	-0.8697	1.73007	-0.502697	0.615177	0.690836
APC_IM_vircontig_181	3.73623	2.67984	1.76039	1.5223	0.127934	0.293654
APC_IM_vircontig_182	28.3794	-0.608576	1.70551	-0.356829	0.72122	0.780727
APC_IM_vircontig_183	11.8995	-3.45247	1.82987	-1.88673	0.0591968	0.198128
APC_IM_vircontig_184	2.40457	1.853	2.32654	0.796463	0.425763	0.533016
APC_IM_vircontig_186	1.98462	1.10495	1.66574	0.663337	0.507115	0.609281
APC_IM_vircontig_191	2.4937	-3.08216	2.11357	-1.45827	0.144766	0.308121
APC_IM_vircontig_194	1.69627	-3.95457	1.80821	-2.18701	0.028742	0.136629
APC_IM_vircontig_199	14.4846	-5.00898	1.63886	-3.05638	0.0022403	0.0430515
APC_IM_vircontig_201	4.74024	-4.6356	1.91516	-2.42047	0.0155003	0.0977714
APC_IM_vircontig_210	10.6705	-4.82647	1.65244	-2.92081	0.00349121	0.0477132
APC_IM_vircontig_212	1.64547	-3.77869	2.3699	-1.59445	0.110835	0.27751
APC_IM_vircontig_220	2.27829	-2.1953	1.98076	-1.10831	0.267726	0.408438
APC_IM_vircontig_222	5.2501	-3.47484	1.88259	-1.84577	0.0649249	0.206751
APC_IM_vircontig_227	4.17862	0.765857	1.77277	0.432012	0.665733	0.73522
APC_IM_vircontig_246	4.03161	5.92944	2.3648	2.50737	0.0121632	0.0831151
APC_IM_vircontig_247	3.17592	-0.738949	1.73258	-0.426501	0.669743	0.737166
APC_IM_vircontig_248	12.9349	-2.48055	1.62987	-1.52193	0.128026	0.293654
APC_IM_vircontig_249	31.4069	-6.46812	2.14214	-3.01947	0.00253213	0.0430515
APC_IM_vircontig_253	44.2775	-6.30182	1.85372	-3.39955	0.000674958	0.0241812
APC_IM_vircontig_255	2.0732	-3.8302	1.58061	-2.42324	0.0153827	0.0977714
APC_IM_vircontig_257	2.38067	-4.20352	2.36916	-1.77427	0.0760186	0.220656
APC_IM_vircontig_258	12.9873	5.92265	1.97707	2.99567	0.00273842	0.0430515
APC_IM_vircontig_261	9.65481	-0.722078	2.10536	-0.342971	0.73162	0.785613
APC_IM_vircontig_274	3.22933	-2.42087	1.60882	-1.50475	0.132388	0.296775
APC_IM_vircontig_278	2.01455	-0.569507	1.85312	-0.307323	0.758597	0.805242
APC_IM_vircontig_279	2.67111	-4.62681	2.11325	-2.18942	0.028566	0.136629
APC_IM_vircontig_283	3.02286	-2.76711	2.1663	-1.27734	0.201481	0.349661
APC_IM_vircontig_285	26.8766	-1.14994	1.34829	-0.85289	0.393721	0.502492
APC_IM_vircontig_286	102.122	-8.78457	2.18005	-4.02953	5.58882e-05	0.00747941
APC_IM_vircontig_291	31.2204	-5.26777	1.89053	-2.78639	0.00532981	0.0528846
APC_IM_vircontig_292	25.2473	-1.27554	1.4544	-0.87702	0.380476	0.500456
APC_IM_vircontig_293	5.82647	3.21702	1.59961	2.01112	0.0443123	0.177249
APC_IM_vircontig_296	1.93002	-1.20795	2.12647	-0.568054	0.569998	0.660116
APC_IM_vircontig_297	3.21242	-1.93248	1.49719	-1.29074	0.196795	0.343345
APC_IM_vircontig_309	6.39322	-4.24654	1.84671	-2.29952	0.0214756	0.113613
APC_IM_vircontig_316	111.393	-1.25032	2.22787	-0.561216	0.57465	0.660116
APC_IM_vircontig_317	12.3761	-0.731113	1.44095	-0.507382	0.611887	0.689687
APC_IM_vircontig_321	4.51932	6.45551	2.16464	2.98225	0.00286136	0.0430515
APC_IM_vircontig_324	3.91727	-1.60105	1.7648	-0.90721	0.364296	0.490302
APC_IM_vircontig_327	3.04923	2.28451	1.70152	1.34263	0.179392	0.32891
APC_IM_vircontig_343	26.0112	5.80538	2.22602	2.60797	0.00910822	0.0694767
APC_IM_vircontig_344	19.348	-1.20744	1.41416	-0.853823	0.393203	0.502492
APC_IM_vircontig_352	2.47116	-2.04883	1.61891	-1.26556	0.20567	0.351353
APC_IM_vircontig_354	38.8562	-2.16185	1.52942	-1.41351	0.157505	0.315009
APC_IM_vircontig_356	3.35187	-2.4563	1.85991	-1.32065	0.186618	0.32909
APC_IM_vircontig_363	2.40464	-4.27488	2.02484	-2.11122	0.0347535	0.158322
APC_IM_vircontig_368	3.82483	-5.19816	1.97849	-2.62734	0.0086056	0.0694767
APC_IM_vircontig_370	28.8073	-3.21062	1.37572	-2.33377	0.0196076	0.111
APC_IM_vircontig_383	1.6037	-3.61725	2.15912	-1.67534	0.0938678	0.246811
APC_IM_vircontig_385	1.65201	-1.01784	1.9432	-0.523795	0.600421	0.686195
APC_IM_vircontig_391	11.4985	-2.88956	1.46248	-1.9758	0.0481774	0.180651
APC_IM_vircontig_393	1.70387	4.08181	2.06877	1.97306	0.0484884	0.180651
APC_IM_vircontig_394	143.108	-1.88493	1.48363	-1.27049	0.203912	0.350173
APC_IM_vircontig_401	4.50681	-3.43743	2.29055	-1.5007	0.133433	0.296775
APC_IM_vircontig_402	1.86283	5.10476	2.13592	2.38996	0.0168502	0.100488
APC_IM_vircontig_408	8.92643	-2.04446	1.40819	-1.45184	0.146545	0.308121
APC_IM_vircontig_410	2.69219	-2.03034	1.71669	-1.18271	0.236926	0.377767
APC_IM_vircontig_412	1.76351	3.57361	1.85063	1.93103	0.0534796	0.190666
APC_IM_vircontig_416	39.4399	-1.80566	1.34913	-1.33839	0.180769	0.32891
APC_IM_vircontig_421	5.62527	-5.19335	2.36785	-2.19328	0.0282875	0.136629
APC_IM_vircontig_427	1.55044	0.425227	2.25287	0.188749	0.850289	0.871159
APC_IM_vircontig_428	20.9453	-1.66705	1.4805	-1.12601	0.260163	0.404054
APC_IM_vircontig_429	4.02802	4.71027	1.80271	2.61288	0.00897824	0.0694767
APC_IM_vircontig_434	5.98053	2.74303	1.56948	1.74773	0.0805109	0.229631
APC_IM_vircontig_435	8.40921	-3.62979	1.7307	-2.0973	0.035967	0.161605
APC_IM_vircontig_438	2.89766	-3.32391	1.75261	-1.89655	0.0578878	0.197783
APC_IM_vircontig_448	1.64884	-0.559283	1.69506	-0.329948	0.741439	0.792157
APC_IM_vircontig_453	1.51828	-1.29906	2.23765	-0.580545	0.561547	0.653147
APC_IM_vircontig_454	2.78789	1.65364	1.61619	1.02317	0.306226	0.446183
APC_IM_vircontig_455	4.36611	-4.20279	2.36523	-1.77691	0.0755831	0.220656
APC_IM_vircontig_456	5.99419	2.46483	1.75208	1.4068	0.159486	0.315907
APC_IM_vircontig_458	1.64444	0.687616	2.01502	0.341245	0.732919	0.785613
APC_IM_vircontig_462	2.39464	-3.657	1.85115	-1.97553	0.0482081	0.180651
APC_IM_vircontig_485	1.5401	-0.29057	2.02157	-0.143735	0.88571	0.89942
APC_IM_vircontig_487	43.2343	-4.44314	2.02466	-2.19451	0.0281987	0.136629
APC_IM_vircontig_488	13.312	-1.83223	1.20933	-1.51508	0.129753	0.295549
APC_IM_vircontig_492	1.59599	-0.931044	1.94635	-0.478354	0.632399	0.704202
APC_IM_vircontig_494	2.6104	-0.51744	2.04222	-0.253371	0.799981	0.83036
APC_IM_vircontig_502	25.6066	-6.25759	2.1952	-2.85057	0.00436406	0.0493363
APC_IM_vircontig_506	7.55718	3.28449	1.93591	1.69661	0.0897709	0.241389
APC_IM_vircontig_507	58.7185	-2.63416	1.55081	-1.69857	0.0893995	0.241389
APC_IM_vircontig_511	1.80286	-3.92502	1.9114	-2.05348	0.0400256	0.167485
APC_IM_vircontig_514	6.04495	-3.89371	1.95023	-1.99654	0.0458753	0.180651
APC_IM_vircontig_517	19.9589	-2.40356	1.39853	-1.71863	0.0856809	0.238755
APC_IM_vircontig_533	2.5992	-4.51361	1.99463	-2.26288	0.023643	0.12117
APC_IM_vircontig_539	2.14041	-2.76615	2.20113	-1.2567	0.208863	0.354448
APC_IM_vircontig_540	47.5377	-1.37154	1.35168	-1.01469	0.310253	0.448294
APC_IM_vircontig_546	7.24999	5.85569	1.48948	3.93136	8.44682e-05	0.00747941
APC_IM_vircontig_555	3.07967	-4.02685	2.17957	-1.84754	0.0646687	0.206751
APC_IM_vircontig_558	6.84125	4.17733	2.17139	1.9238	0.0543794	0.19179
APC_IM_vircontig_565	9.60356	-1.18993	1.42556	-0.834715	0.403878	0.513458
APC_IM_vircontig_568	1.64315	2.46731	2.00605	1.22994	0.218721	0.355831
APC_IM_vircontig_570	1.86482	2.18368	1.99869	1.09256	0.274589	0.411257
APC_IM_vircontig_578	28.3239	-2.23835	1.41328	-1.5838	0.113239	0.279265
APC_IM_vircontig_583	1.88152	1.66613	1.93243	0.862196	0.38858	0.501788
APC_IM_vircontig_586	5.97755	-0.736373	1.41943	-0.51878	0.603914	0.687791
APC_IM_vircontig_589	2.79029	-1.75022	1.55761	-1.12366	0.261157	0.404054
APC_IM_vircontig_594	1.50303	3.12534	2.22369	1.40548	0.15988	0.315907
APC_IM_vircontig_596	1.59111	-2.0625	1.67844	-1.22882	0.21914	0.355831
APC_IM_vircontig_607	7.42802	-1.86435	1.95428	-0.953984	0.340092	0.474681
APC_IM_vircontig_612	10.1187	-1.79571	1.3492	-1.33095	0.183206	0.32891
APC_IM_vircontig_616	23.4659	-2.24626	1.48756	-1.51003	0.131036	0.296411
APC_IM_vircontig_619	4.55604	-3.00206	1.55389	-1.93196	0.0533643	0.190666
APC_IM_vircontig_645	1.89834	1.72925	1.87879	0.920407	0.35736	0.487086
APC_IM_vircontig_649	6.34002	-3.13867	1.51034	-2.07813	0.0376977	0.164865
APC_IM_vircontig_658	1.94104	-3.55942	2.05988	-1.72797	0.0839929	0.237497
APC_IM_vircontig_662	1.72632	-1.43246	1.65337	-0.866387	0.386278	0.500787
APC_IM_vircontig_666	24.3079	-6.58846	2.10197	-3.13442	0.00172194	0.0403425
APC_IM_vircontig_679	3.06088	-3.71771	2.07128	-1.79489	0.0726719	0.220656
APC_IM_vircontig_681	6.29233	0.264038	1.03656	0.254725	0.798936	0.83036
APC_IM_vircontig_687	21.2726	-0.62883	1.37274	-0.458083	0.646893	0.716827
APC_IM_vircontig_695	9.00426	-1.10114	2.16156	-0.509422	0.610456	0.689687
APC_IM_vircontig_696	22.8721	-2.08785	1.51458	-1.3785	0.168049	0.324235
APC_IM_vircontig_700	3.214	-2.33472	1.88902	-1.23594	0.216481	0.355613
APC_IM_vircontig_701	8.66874	-2.71865	1.58294	-1.71747	0.0858937	0.238755
APC_IM_vircontig_702	7.74521	-1.10415	1.72381	-0.640529	0.521829	0.617846
APC_IM_vircontig_708	5.39461	-5.3926	2.05693	-2.62167	0.00874993	0.0694767
APC_IM_vircontig_711	8.18393	5.07527	2.03031	2.49975	0.012428	0.0831915
APC_IM_vircontig_712	1.74477	-2.21261	2.00784	-1.10199	0.270468	0.409445
APC_IM_vircontig_716	3.50608	-4.99245	2.07638	-2.4044	0.0161991	0.0995711
APC_IM_vircontig_724	11.5599	-5.8112	2.01421	-2.8851	0.00391285	0.0483644
APC_IM_vircontig_750	2.84189	-1.41333	1.56162	-0.905039	0.365445	0.490302
APC_IM_vircontig_752	4.61856	-1.13761	1.65415	-0.68773	0.491623	0.601688
APC_IM_vircontig_754	14.6806	4.1782	2.16184	1.93271	0.0532721	0.190666
APC_IM_vircontig_757	4.92317	-3.55114	1.90443	-1.86467	0.062227	0.204105
APC_IM_vircontig_761	4.14876	-2.18041	1.47958	-1.47367	0.140571	0.303338
APC_IM_vircontig_769	5.88339	0.980632	1.75163	0.559839	0.575589	0.660116
APC_IM_vircontig_773	6.02208	-3.13244	1.46588	-2.13691	0.0326056	0.150629
APC_IM_vircontig_788	1.82089	-0.500391	1.65491	-0.302369	0.762371	0.806638
APC_IM_vircontig_790	8.54078	-2.70006	1.53066	-1.76399	0.0777341	0.223656
APC_IM_vircontig_791	1.97106	-4.12802	2.24643	-1.83759	0.0661226	0.20854
APC_IM_vircontig_800	2.57444	-4.40967	1.91039	-2.30826	0.0209846	0.112835
APC_IM_vircontig_809	5.28117	-3.45423	1.45982	-2.3662	0.0179716	0.105262
APC_IM_vircontig_812	7.31069	-5.6649	1.9751	-2.86816	0.00412867	0.0483644
APC_IM_vircontig_814	3.04258	3.30215	1.96992	1.67628	0.0936825	0.246811
APC_IM_vircontig_815	5.6	-5.45364	1.89497	-2.87795	0.00400271	0.0483644
APC_IM_vircontig_820	8.371	-1.72319	1.37682	-1.25158	0.210724	0.354448
APC_IM_vircontig_821	8.50026	-0.139885	2.19538	-0.0637181	0.949195	0.952097
APC_IM_vircontig_823	2.60083	-4.10118	1.96812	-2.0838	0.0371781	0.164789
APC_IM_vircontig_825	29.0173	-2.45647	1.35667	-1.81066	0.0701942	0.219273
APC_IM_vircontig_829	12.7488	3.50866	2.34089	1.49886	0.133911	0.296775
APC_IM_vircontig_831	8.7841	-1.81472	1.46943	-1.23498	0.216837	0.355613
APC_IM_vircontig_836	2.3468	-3.87485	1.9685	-1.96843	0.0490181	0.180651
APC_IM_vircontig_842	1.78066	-3.20507	2.32144	-1.38064	0.167391	0.324235
APC_IM_vircontig_847	33.4354	-6.46461	2.18168	-2.96313	0.00304525	0.0434279
APC_IM_vircontig_851	2.73167	-2.61167	1.46737	-1.77983	0.0751039	0.220656
APC_IM_vircontig_857	1.88531	-4.22857	2.06246	-2.05026	0.0403394	0.167485
APC_IM_vircontig_864	1.77084	-3.87212	1.96158	-1.97398	0.0483842	0.180651
APC_IM_vircontig_865	11.3442	-1.60967	1.43763	-1.11967	0.262853	0.404769
APC_IM_vircontig_866	5.57196	-1.12351	1.25329	-0.896448	0.370014	0.493351
APC_IM_vircontig_876	13.9942	-2.12962	1.50552	-1.41454	0.157203	0.315009
APC_IM_vircontig_877	7.00815	-5.16768	2.0413	-2.53156	0.0113556	0.0809701
APC_IM_vircontig_894	10.8344	-6.40085	2.05847	-3.10952	0.00187394	0.0409767
APC_IM_vircontig_909	4.47364	1.06491	1.59069	0.669464	0.5032	0.6068
APC_IM_vircontig_927	4.82463	-2.66707	1.48311	-1.79829	0.0721307	0.220656
APC_IM_vircontig_928	16.3045	-2.20938	1.65673	-1.33358	0.182342	0.32891
APC_IM_vircontig_942	14.3115	-1.82853	1.52558	-1.19858	0.23069	0.370913
APC_IM_vircontig_946	17.1652	-3.60944	1.29964	-2.77726	0.00548194	0.0528846
APC_IM_vircontig_949	13.3164	-1.51977	1.28837	-1.1796	0.238158	0.377767
APC_IM_vircontig_963	6.60627	-0.419828	1.44327	-0.290887	0.771138	0.81329
APC_IM_vircontig_971	6.3516	-1.4794	1.34447	-1.10036	0.271175	0.409445
APC_IM_vircontig_973	8.26145	-5.65161	2.35479	-2.40005	0.0163928	0.0995711
APC_IM_vircontig_976	3.37618	6.56477	2.15166	3.05103	0.00228055	0.0430515
APC_IM_vircontig_980	104.9	-1.99166	1.48623	-1.34007	0.180221	0.32891
APC_IM_vircontig_987	2.07284	-1.26001	1.53701	-0.819783	0.41234	0.519912
APC_IM_vircontig_995	20.0198	-2.44762	1.59906	-1.53066	0.125853	0.293268
APC_IM_vircontig_998	3.39676	-0.980716	2.05595	-0.477013	0.633353	0.704202
APC_IM_vircontig_1006	8.68508	-2.52526	1.48848	-1.69653	0.0897848	0.241389
APC_IM_vircontig_1009	3.64375	-0.871252	1.69553	-0.513852	0.607355	0.689317
APC_IM_vircontig_1011	11.0549	-1.76707	1.26531	-1.39656	0.162546	0.319253
APC_IM_vircontig_1015	2.08314	-3.81424	1.753	-2.17583	0.0295677	0.138546
APC_IM_vircontig_1026	8.00077	-2.47301	1.38592	-1.78439	0.0743606	0.220656
APC_IM_vircontig_1031	3.40322	-1.83886	1.37519	-1.33717	0.181167	0.32891
APC_IM_vircontig_1032	21.2364	-2.26448	1.57296	-1.43963	0.149972	0.309376
APC_IM_vircontig_1035	2.85468	-3.40669	1.49001	-2.28636	0.0222333	0.115754
APC_IM_vircontig_1039	55.9975	-1.45876	1.5355	-0.950019	0.342103	0.475465
APC_IM_vircontig_1042	15.3239	-2.4953	1.49858	-1.66511	0.0958903	0.249619
APC_IM_vircontig_1059	15.7172	-1.01483	1.45975	-0.695208	0.486925	0.59817
APC_IM_vircontig_1071	3.78872	-0.0897135	1.40215	-0.0639827	0.948984	0.952097
APC_IM_vircontig_1079	6.29701	-0.451625	1.45898	-0.309548	0.756904	0.805242
APC_IM_vircontig_1097	3.27947	-2.86564	1.53643	-1.86513	0.0621632	0.204105
APC_IM_vircontig_1118	7.22642	-1.91306	1.44822	-1.32097	0.186511	0.32909
APC_IM_vircontig_1139	3.28589	-2.27454	1.58821	-1.43214	0.152103	0.311812
APC_IM_vircontig_1143	2.5828	-2.00325	1.38783	-1.44344	0.148896	0.309101
APC_IM_vircontig_1151	3.31293	-0.307048	1.7598	-0.174479	0.861489	0.877542
APC_IM_vircontig_1167	11.497	-2.07085	1.65198	-1.25356	0.210002	0.354448
APC_IM_vircontig_1172	6.00084	-1.89423	1.92793	-0.982517	0.325845	0.460677
APC_IM_vircontig_1174	6.45629	-4.71131	1.67163	-2.8184	0.00482638	0.0494704
APC_IM_vircontig_1187	5.97649	-2.23117	1.42924	-1.56109	0.118503	0.28399
APC_IM_vircontig_1199	7.04977	-1.96747	1.43257	-1.37338	0.169634	0.324934
APC_IM_vircontig_1200	3.82712	-2.95727	1.43988	-2.05384	0.0399914	0.167485
APC_IM_vircontig_1203	1.52194	-1.99594	1.5183	-1.31459	0.188649	0.330892
APC_IM_vircontig_1205	4.97872	-0.963268	1.41159	-0.6824	0.494986	0.60276
APC_IM_vircontig_1231	8.12246	-1.67109	1.58358	-1.05526	0.291309	0.430402
APC_IM_vircontig_1242	2.45211	-1.87036	1.80131	-1.03833	0.299115	0.43799
APC_IM_vircontig_1249	1.8508	-0.985844	1.54591	-0.637711	0.523662	0.617846
APC_IM_vircontig_1251	2.26686	-2.10332	1.57488	-1.33554	0.181699	0.32891
APC_IM_vircontig_1264	3.07558	-2.63813	1.7873	-1.47604	0.139933	0.303338
APC_IM_vircontig_1267	1.8319	0.599107	1.71542	0.349247	0.726904	0.784291
APC_IM_vircontig_1279	11.7865	-2.91056	1.41795	-2.05265	0.0401064	0.167485
APC_IM_vircontig_1283	16.9767	-2.63443	1.57339	-1.67436	0.0940591	0.246811
APC_IM_vircontig_1285	6.34872	-1.71704	1.37936	-1.24481	0.213201	0.355613
APC_IM_vircontig_1312	3.60072	-2.91268	1.52359	-1.91172	0.0559115	0.195096
APC_IM_vircontig_1318	6.47048	-1.37104	1.54614	-0.886748	0.375215	0.497581
APC_IM_vircontig_1321	4.65859	-2.62726	1.48008	-1.77509	0.0758838	0.220656
APC_IM_vircontig_1323	1.93438	-1.30243	1.91388	-0.680521	0.496175	0.60276
APC_IM_vircontig_1325	4.21479	-1.39898	1.5483	-0.903555	0.366232	0.490302
APC_IM_vircontig_1326	1.61703	-2.01983	1.6296	-1.23946	0.215174	0.355613
APC_IM_vircontig_1349	2.7982	-1.45781	1.47586	-0.98777	0.323265	0.459009
APC_IM_vircontig_1351	88.9759	6.98242	2.17178	3.21507	0.00130411	0.0356458
APC_IM_vircontig_1354	7.0868	-1.01218	1.57861	-0.641185	0.521402	0.617846
APC_IM_vircontig_1372	6.30716	-1.66636	1.46927	-1.13414	0.256738	0.401
APC_IM_vircontig_1382	6.81573	-2.28477	1.58126	-1.4449	0.148485	0.309101
APC_IM_vircontig_1390	1.74624	-0.940827	1.5683	-0.599901	0.548572	0.640326
APC_IM_vircontig_1393	1.86365	-2.53482	1.59462	-1.58961	0.111923	0.278112
APC_IM_vircontig_1394	3.97031	-4.77087	1.67993	-2.83992	0.00451247	0.0493363
APC_IM_vircontig_1395	2.93694	-0.930657	1.4866	-0.62603	0.531295	0.624605
APC_IM_vircontig_1399	4.93864	-2.07807	1.40125	-1.48301	0.138071	0.301915
APC_IM_vircontig_1402	2.03577	-0.274079	1.47478	-0.185844	0.852567	0.871159
APC_IM_vircontig_1411	2.77445	-0.383502	1.78358	-0.215017	0.829754	0.855847
APC_IM_vircontig_1448	2.44044	-1.71304	1.69879	-1.00839	0.313268	0.450666
APC_IM_vircontig_1468	5.60922	-1.04573	1.54922	-0.675003	0.499674	0.604771
APC_IM_vircontig_1489	9.50359	-1.32013	1.35657	-0.973136	0.330486	0.463245
APC_IM_vircontig_1493	1.71681	-3.83979	2.3698	-1.6203	0.105168	0.265346
APC_IM_vircontig_1503	8.38345	-0.866621	1.42533	-0.608015	0.543177	0.636293
APC_IM_vircontig_1506	3.89589	-1.80594	1.3173	-1.37095	0.170392	0.324934
APC_IM_vircontig_1515	3.05445	-2.3711	1.73633	-1.36558	0.172072	0.32624
APC_IM_vircontig_1539	10.1307	-1.93306	1.63961	-1.17898	0.238408	0.377767
APC_IM_vircontig_1549	8.45039	-2.31945	1.62838	-1.42439	0.154332	0.314306
APC_IM_vircontig_1552	2.1712	-4.21984	2.27127	-1.85792	0.0631802	0.205179
APC_IM_vircontig_1576	6.2461	-1.10124	1.68459	-0.653713	0.513297	0.614457
APC_IM_vircontig_1613	2.7339	-2.20787	1.63023	-1.35433	0.17563	0.32891
APC_IM_vircontig_1661	1.51901	-2.13697	1.39691	-1.52979	0.12607	0.293268
APC_IM_vircontig_1664	2.76819	-4.31806	1.85764	-2.32448	0.0200995	0.11174
APC_IM_vircontig_1673	4.74644	-1.46865	1.5827	-0.927935	0.353441	0.487086
APC_IM_vircontig_1682	3.27198	-3.22677	1.60253	-2.01355	0.0440573	0.177249
APC_IM_vircontig_1724	2.85114	-3.54218	1.60276	-2.21006	0.0271013	0.136629
APC_IM_vircontig_1752	12.2476	-0.59359	1.41824	-0.418541	0.675552	0.741074
APC_IM_vircontig_1775	6.00682	-1.20508	1.61386	-0.746707	0.455241	0.565602
APC_IM_vircontig_1786	3.78562	-0.107706	1.46837	-0.0733506	0.941527	0.950218
APC_IM_vircontig_1808	5.0169	-1.86414	1.52071	-1.22584	0.22026	0.355888
APC_IM_vircontig_1845	1.61468	-1.95853	2.21333	-0.884883	0.37622	0.497581
APC_IM_vircontig_1871	3.87365	-1.35029	1.55312	-0.869402	0.384628	0.500787
APC_IM_vircontig_1872	1.50343	-2.10456	1.6986	-1.239	0.215346	0.355613
APC_IM_vircontig_1900	3.7838	-1.25077	1.66144	-0.752821	0.451558	0.563159
APC_IM_vircontig_1902	5.85428	-1.60977	1.57724	-1.02063	0.307431	0.446183
APC_IM_vircontig_1924	2.00843	-2.29838	1.73727	-1.32298	0.185841	0.32909
APC_IM_vircontig_1933	3.60476	-1.37134	1.38467	-0.990371	0.321993	0.459009
APC_IM_vircontig_1954	2.60901	-1.91666	1.63358	-1.17329	0.24068	0.379534
APC_IM_vircontig_1965	1.74748	3.35544	2.04438	1.6413	0.100735	0.256132
APC_IM_vircontig_1990	6.46389	-2.24979	2.01647	-1.11571	0.264546	0.405472
APC_IM_vircontig_2014	1.54447	-2.2453	1.6283	-1.37892	0.167918	0.324235
